# Supplementary material for: Identifying the causative proteins of similar side effect pairs to explore the common molecular basis of these side effects
Source: Royal Society of Chemistry journal article supplement (doi:10.1039/c5mb00242g), 2015-04-28
Supplement: c5mb00242g1.xlsx [file c5mb00242g1.xlsx]

## Sheet: Sheet1
ADR ID	ADR name
C0000737, C0003123	abdominal pain, anorexia
C0000737, C0003467	abdominal pain, anxiety
C0000737, C0003862	abdominal pain, arthralgias
C0000737, C0004093	abdominal pain, asthenic
C0000737, C0004604	abdominal pain, back pain
C0000737, C0008031	abdominal pain, chest pain
C0000737, C0009806	abdominal pain, constipation
C0000737, C0010200	abdominal pain, cough
C0000737, C0011991	abdominal pain, diarrhea
C0000737, C0012833	abdominal pain, dizziness
C0000737, C0013395	abdominal pain, indigestion
C0000737, C0013404	abdominal pain, dyspnea
C0000737, C0013604	abdominal pain, oedema
C0000737, C0015230	abdominal pain, skin rashes
C0000737, C0015672	abdominal pain, tiredness
C0000737, C0015967	abdominal pain, fever
C0000737, C0018681	abdominal pain, headache
C0000737, C0020517	abdominal pain, allergy
C0000737, C0027497	abdominal pain, nausea
C0000737, C0030193	abdominal pain, pain
C0000737, C0030554	abdominal pain, paresthesias
C0000737, C0033774	abdominal pain, itching
C0000737, C0042963	abdominal pain, vomiting
C0000737, C0231528	abdominal pain, myalgia
C0000737, C0917801	abdominal pain, insomnia
C0002871, C0003123	anemia, anorexia
C0002871, C0009806	anemia, constipation
C0002871, C0011991	anemia, diarrhea
C0002871, C0015230	anemia, skin rashes
C0002871, C0015967	anemia, fever
C0002871, C0023530	anemia, leukopenia
C0002871, C0027497	anemia, nausea
C0002871, C0040034	anemia, thrombocytopenia
C0002871, C0042963	anemia, vomiting
C0003123, C0004093	anorexia, asthenic
C0003123, C0009806	anorexia, constipation
C0003123, C0011991	anorexia, diarrhea
C0003123, C0012833	anorexia, dizziness
C0003123, C0013395	anorexia, indigestion
C0003123, C0013404	anorexia, dyspnea
C0003123, C0015230	anorexia, skin rashes
C0003123, C0015672	anorexia, tiredness
C0003123, C0015967	anorexia, fever
C0003123, C0023530	anorexia, leukopenia
C0003123, C0027497	anorexia, nausea
C0003123, C0033774	anorexia, itching
C0003123, C0040034	anorexia, thrombocytopenia
C0003123, C0042963	anorexia, vomiting
C0003123, C0917801	anorexia, insomnia
C0003467, C0004093	anxiety, asthenic
C0003467, C0008031	anxiety, chest pain
C0003467, C0009806	anxiety, constipation
C0003467, C0010200	anxiety, cough
C0003467, C0012833	anxiety, dizziness
C0003467, C0013395	anxiety, indigestion
C0003467, C0013404	anxiety, dyspnea
C0003467, C0030554	anxiety, paresthesias
C0003467, C0038990	anxiety, sweating
C0003467, C0917801	anxiety, insomnia
C0003467, C2830004	anxiety, somnolence
C0003862, C0004093	arthralgias, asthenic
C0003862, C0004604	arthralgias, back pain
C0003862, C0008031	arthralgias, chest pain
C0003862, C0009806	arthralgias, constipation
C0003862, C0010200	arthralgias, cough
C0003862, C0011991	arthralgias, diarrhea
C0003862, C0013395	arthralgias, indigestion
C0003862, C0013404	arthralgias, dyspnea
C0003862, C0013604	arthralgias, oedema
C0003862, C0015672	arthralgias, tiredness
C0003862, C0030554	arthralgias, paresthesias
C0003862, C0031350	arthralgias, pharyngitis
C0003862, C0231218	arthralgias, malaise
C0003862, C0231528	arthralgias, myalgia
C0003862, C0917801	arthralgias, insomnia
C0004093, C0004604	asthenic, back pain
C0004093, C0008031	asthenic, chest pain
C0004093, C0009806	asthenic, constipation
C0004093, C0010200	asthenic, cough
C0004093, C0011991	asthenic, diarrhea
C0004093, C0012833	asthenic, dizziness
C0004093, C0013395	asthenic, indigestion
C0004093, C0013404	asthenic, dyspnea
C0004093, C0013604	asthenic, oedema
C0004093, C0015967	asthenic, fever
C0004093, C0030554	asthenic, paresthesias
C0004093, C0035455	asthenic, rhinitis
C0004093, C0231528	asthenic, myalgia
C0004093, C0917801	asthenic, insomnia
C0004093, C2830004	asthenic, somnolence
C0004238, C0232197	fibrillation atrial, fibrillation
C0004604, C0008031	back pain, chest pain
C0004604, C0010200	back pain, cough
C0004604, C0013395	back pain, indigestion
C0004604, C0031350	back pain, pharyngitis
C0004604, C0037199	back pain, sinusitis
C0004604, C0231528	back pain, myalgia
C0006277, C0021400	bronchitis, flu syndrome
C0006277, C0037199	bronchitis, sinusitis
C0008031, C0009806	chest pain, constipation
C0008031, C0010200	chest pain, cough
C0008031, C0013395	chest pain, indigestion
C0008031, C0013404	chest pain, dyspnea
C0008031, C0013604	chest pain, oedema
C0008031, C0030554	chest pain, paresthesias
C0008031, C0231528	chest pain, myalgia
C0009676, C0009806	confusional state, constipation
C0009676, C0018524	confusional state, hallucination
C0009806, C0010200	constipation, cough
C0009806, C0011991	constipation, diarrhea
C0009806, C0012833	constipation, dizziness
C0009806, C0013395	constipation, indigestion
C0009806, C0013404	constipation, dyspnea
C0009806, C0013604	constipation, oedema
C0009806, C0015230	constipation, skin rashes
C0009806, C0015672	constipation, tiredness
C0009806, C0015967	constipation, fever
C0009806, C0018681	constipation, headache
C0009806, C0027497	constipation, nausea
C0009806, C0030554	constipation, paresthesias
C0009806, C0033774	constipation, itching
C0009806, C0038990	constipation, sweating
C0009806, C0042963	constipation, vomiting
C0009806, C0043352	constipation, mouth dry
C0009806, C0231528	constipation, myalgia
C0009806, C0917801	constipation, insomnia
C0009806, C2830004	constipation, somnolence
C0010200, C0013395	cough, indigestion
C0010200, C0013404	cough, dyspnea
C0010200, C0013604	cough, oedema
C0010200, C0015967	cough, fever
C0010200, C0021311	cough, infections
C0010200, C0031350	cough, pharyngitis
C0010200, C0035455	cough, rhinitis
C0010200, C0231528	cough, myalgia
C0011991, C0012833	diarrhea, dizziness
C0011991, C0013395	diarrhea, indigestion
C0011991, C0013404	diarrhea, dyspnea
C0011991, C0013604	diarrhea, oedema
C0011991, C0015230	diarrhea, skin rashes
C0011991, C0015672	diarrhea, tiredness
C0011991, C0015967	diarrhea, fever
C0011991, C0018681	diarrhea, headache
C0011991, C0020517	diarrhea, allergy
C0011991, C0027497	diarrhea, nausea
C0011991, C0030193	diarrhea, pain
C0011991, C0030554	diarrhea, paresthesias
C0011991, C0033774	diarrhea, itching
C0011991, C0040034	diarrhea, thrombocytopenia
C0011991, C0042109	diarrhea, urticaria
C0011991, C0042963	diarrhea, vomiting
C0011991, C0231528	diarrhea, myalgia
C0011991, C0917801	diarrhea, insomnia
C0012833, C0013395	dizziness, indigestion
C0012833, C0013404	dizziness, dyspnea
C0012833, C0013604	dizziness, oedema
C0012833, C0015230	dizziness, skin rashes
C0012833, C0015672	dizziness, tiredness
C0012833, C0015967	dizziness, fever
C0012833, C0018681	dizziness, headache
C0012833, C0020517	dizziness, allergy
C0012833, C0020649	dizziness, hypotension
C0012833, C0027497	dizziness, nausea
C0012833, C0030193	dizziness, pain
C0012833, C0030554	dizziness, paresthesias
C0012833, C0033774	dizziness, itching
C0012833, C0042109	dizziness, urticaria
C0012833, C0042963	dizziness, vomiting
C0012833, C0043352	dizziness, mouth dry
C0012833, C0917801	dizziness, insomnia
C0013395, C0013404	indigestion, dyspnea
C0013395, C0013604	indigestion, oedema
C0013395, C0015230	indigestion, skin rashes
C0013395, C0015672	indigestion, tiredness
C0013395, C0016204	indigestion, flatulence
C0013395, C0030193	indigestion, pain
C0013395, C0030554	indigestion, paresthesias
C0013395, C0031350	indigestion, pharyngitis
C0013395, C0033774	indigestion, itching
C0013395, C0035455	indigestion, rhinitis
C0013395, C0042571	indigestion, vertigo
C0013395, C0043352	indigestion, mouth dry
C0013395, C0231528	indigestion, myalgia
C0013395, C0917801	indigestion, insomnia
C0013395, C2830004	indigestion, somnolence
C0013404, C0013604	dyspnea, oedema
C0013404, C0015230	dyspnea, skin rashes
C0013404, C0015672	dyspnea, tiredness
C0013404, C0015967	dyspnea, fever
C0013404, C0018681	dyspnea, headache
C0013404, C0020517	dyspnea, allergy
C0013404, C0020649	dyspnea, hypotension
C0013404, C0027497	dyspnea, nausea
C0013404, C0030193	dyspnea, pain
C0013404, C0030554	dyspnea, paresthesias
C0013404, C0033774	dyspnea, itching
C0013404, C0038990	dyspnea, sweating
C0013404, C0039070	dyspnea, syncope
C0013404, C0039231	dyspnea, tachycardia
C0013404, C0042963	dyspnea, vomiting
C0013404, C0231528	dyspnea, myalgia
C0013404, C0917801	dyspnea, insomnia
C0013404, C2830004	dyspnea, somnolence
C0013604, C0015230	oedema, skin rashes
C0013604, C0015967	oedema, fever
C0013604, C0018681	oedema, headache
C0013604, C0020517	oedema, allergy
C0013604, C0021311	oedema, infections
C0013604, C0027497	oedema, nausea
C0013604, C0030193	oedema, pain
C0013604, C0030554	oedema, paresthesias
C0013604, C0033774	oedema, itching
C0013604, C0042109	oedema, urticaria
C0013604, C0042963	oedema, vomiting
C0013604, C0231528	oedema, myalgia
C0013604, C0917801	oedema, insomnia
C0013687, C0032226	effusion, pleural
C0013687, C0032227	effusion, pleural effusion
C0015230, C0015672	skin rashes, tiredness
C0015230, C0015967	skin rashes, fever
C0015230, C0018681	skin rashes, headache
C0015230, C0020517	skin rashes, allergy
C0015230, C0027497	skin rashes, nausea
C0015230, C0030193	skin rashes, pain
C0015230, C0030554	skin rashes, paresthesias
C0015230, C0033774	skin rashes, itching
C0015230, C0040034	skin rashes, thrombocytopenia
C0015230, C0042109	skin rashes, urticaria
C0015230, C0042963	skin rashes, vomiting
C0015230, C0917801	skin rashes, insomnia
C0015672, C0027497	tiredness, nausea
C0015672, C0030554	tiredness, paresthesias
C0015672, C0042963	tiredness, vomiting
C0015672, C0917801	tiredness, insomnia
C0015967, C0018681	fever, headache
C0015967, C0020517	fever, allergy
C0015967, C0027497	fever, nausea
C0015967, C0030193	fever, pain
C0015967, C0030554	fever, paresthesias
C0015967, C0033774	fever, itching
C0015967, C0042109	fever, urticaria
C0015967, C0042963	fever, vomiting
C0015967, C0231528	fever, myalgia
C0017178, C0025061	gastrointestinal disorders, mediastinal disorders
C0017178, C0027765	gastrointestinal disorders, nervous system disorders
C0017178, C0729233	gastrointestinal disorders, thoracic complications
C0018681, C0020517	headache, allergy
C0018681, C0027497	headache, nausea
C0018681, C0030193	headache, pain
C0018681, C0030554	headache, paresthesias
C0018681, C0033774	headache, itching
C0018681, C0042109	headache, urticaria
C0018681, C0042963	headache, vomiting
C0018681, C0917801	headache, insomnia
C0018801, C0018802	cardiac failure, congestive heart failure
C0019340, C0019348	herpes, herpes simplex
C0019340, C0019360	herpes, zoster
C0020517, C0027497	allergy, nausea
C0020517, C0030193	allergy, pain
C0020517, C0033774	allergy, itching
C0020517, C0042109	allergy, urticaria
C0020517, C0042963	allergy, vomiting
C0020649, C0039231	hypotension, tachycardia
C0020649, C0042963	hypotension, vomiting
C0021167, C0042024	incontinence, urinary incontinence
C0021400, C0031350	flu syndrome, pharyngitis
C0021400, C0037199	flu syndrome, sinusitis
C0023530, C0040034	leukopenia, thrombocytopenia
C0025061, C0027765	mediastinal disorders, nervous system disorders
C0025061, C0042373	mediastinal disorders, vascular disorders
C0025061, C0729233	mediastinal disorders, thoracic complications
C0027497, C0030193	nausea, pain
C0027497, C0030554	nausea, paresthesias
C0027497, C0033774	nausea, itching
C0027497, C0042109	nausea, urticaria
C0027497, C0042963	nausea, vomiting
C0027497, C0917801	nausea, insomnia
C0027765, C0042373	nervous system disorders, vascular disorders
C0027765, C0729233	nervous system disorders, thoracic complications
C0027769, C0030252	nervousness, palpitation
C0027769, C0043352	nervousness, mouth dry
C0027769, C2830004	nervousness, somnolence
C0029877, C0029882	otitis, otitis media
C0030193, C0033774	pain, itching
C0030193, C0042109	pain, urticaria
C0030193, C0042963	pain, vomiting
C0030252, C0043352	palpitation, mouth dry
C0030554, C0033774	paresthesias, itching
C0030554, C0038990	paresthesias, sweating
C0030554, C0039070	paresthesias, syncope
C0030554, C0042571	paresthesias, vertigo
C0030554, C0042963	paresthesias, vomiting
C0030554, C0043352	paresthesias, mouth dry
C0030554, C0231528	paresthesias, myalgia
C0030554, C0917801	paresthesias, insomnia
C0030554, C2830004	paresthesias, somnolence
C0031350, C0035455	pharyngitis, rhinitis
C0031350, C0037199	pharyngitis, sinusitis
C0031350, C0231528	pharyngitis, myalgia
C0032226, C0032227	pleural, pleural effusion
C0033774, C0042109	itching, urticaria
C0033774, C0042963	itching, vomiting
C0035243, C0041912	respiratory tract infection, upper respiratory infection
C0035455, C0037199	rhinitis, sinusitis
C0035455, C0231528	rhinitis, myalgia
C0036104, C0037036	salivation, increased salivation
C0038990, C0043352	sweating, mouth dry
C0038990, C0917801	sweating, insomnia
C0040034, C0042963	thrombocytopenia, vomiting
C0040264, C0042571	tinnitus, vertigo
C0042109, C0042963	urticaria, vomiting
C0042373, C0729233	vascular disorders, thoracic complications
C0042963, C0917801	vomiting, insomnia
C0043352, C0917801	mouth dry, insomnia
C0043352, C2830004	mouth dry, somnolence
C0151904, C0151905	aspartate aminotransferase increased, elevated alt
C0231218, C0231528	malaise, myalgia
C0231528, C0917801	myalgia, insomnia
C0917801, C2830004	insomnia, somnolence
