# Supplementary material for: Identifying the causative proteins of similar side effect pairs to explore the common molecular basis of these side effects
Source: Royal Society of Chemistry journal article supplement (doi:10.1039/c5mb00242g), 2015-04-28
Supplement: c5mb00242g2.xlsx [file c5mb00242g2.xlsx]

## Sheet: drug-target
drug	target
abarelix	Gnrhr
abilify	DRD2
abilify	cyp2d6
abilify	CYP3A5
abilify	HTR7
abilify	htr2c
abilify	CYP3A4
abilify	HTR1A
abilify	HTR2A
abilify	kcnh2
abilify	Htr2b
abilify	DRD3
abilify	CYP3A7
abilify discmelt	DRD3
abilify discmelt	CYP3A5
abilify discmelt	CYP3A4
abilify discmelt	htr2c
abilify discmelt	DRD2
abilify discmelt	HTR1A
abilify discmelt	cyp2d6
abilify discmelt	kcnh2
abilify discmelt	Htr2b
abilify discmelt	HTR7
abilify discmelt	HTR2A
abilify discmelt	CYP3A7
acamprosate	Grm5
acamprosate	GRM3
acamprosate	Gabra1
acamprosate	GRM1
acamprosate	Grin3a
acamprosate	GRM2
accolate	CHRM1
accolate	CYP2C9
accolate	HTR1F
accolate	HTR2A
accolate	DRD2
accolate	Cyp1a2
accolate	Adrb3
accolate	CYP2C8
accolate	cyp2d6
accolate	HRH1
accolate	pla2g4a
accolate	CYP2E1
accolate	OPRM1
accolate	ADRA1D
accolate	CYSLTR1
accolate	Adora1
accolate	ADRA2C
accolate	CYP2C19
accolate	CYP3A4
acebutolol	ADRB1
acebutolol	Adrb3
acebutolol	cyp2d6
acetylcysteine	CSAD
acetylcysteine	SLC19A3
acetylcysteine	GCLM
acetylcysteine	NFS1
acetylcysteine	CARS2
acetylcysteine	CDO1
acetylcysteine	KIF11
acetylcysteine	CPA1
acetylcysteine	GOT1
acetylcysteine	gss
acetylcysteine	NFKB2
acetylcysteine	GCLC
acetylcysteine	Cbs
acetylcysteine	CTH
acetylcysteine	NFKB1
acetylcysteine	CPA5
acetylcysteine	mgmt
acetylcysteine	relA
acetylcysteine	carS
actonel	FDPS
actonel	ispA
actonel	GGPS1
actos	CYP3A4
actos	cyp2d6
actos	CYP2C19
actos	PPARA
actos	acpT
actos	PPARG
actos	ptpn1
actos	CYP2C8
actos	MAOB
actos	CYP2C9
adapalene	RXRG
adapalene	Rxrb
adapalene	rarA
adapalene	RXRA
adapalene	rarg
adapalene	Rarb
adefovir	ada
adenoscan	Adora2a
adenoscan	AURKA
adenoscan	Adora1
adenoscan	Adora2b
adenoscan	adk
adenoscan	AURKAPS1
adenoscan	TNF
adenoscan	LOC100131909
adenoscan	ADCY1
adenoscan	ADORA3
adenosine	Adora2b
adenosine	TNF
adenosine	AURKAPS1
adenosine	Adora2a
adenosine	ADORA3
adenosine	AURKA
adenosine	LOC100131909
adenosine	ADCY1
adenosine	adk
adenosine	Adora1
afinitor	CYP3A4
afinitor	MTOR
agenerase	CYP3A5
agenerase	gag-pol
agenerase	ABCB1
agenerase	CYP2B6
agenerase	CYP3A7
agenerase	cyp2d6
agenerase	CTSD
agenerase	CYP2C8
agenerase	CYP3A4
agenerase	CYP2C19
agenerase	CYP2C9
albuterol	CYP3A4
albuterol	Adrb3
albuterol	ADRB1
albuterol	IL8
albuterol	ADRB2
aldara	Cyp1a2
aldara	TLR7
aldara	CYP3A4
aldara	TLR8
alendronate	PTPN4
alendronate	GGPS1
alendronate	FDPS
alendronate	PIK3CA
alfuzosin	ADRA1A
alfuzosin	ADRA1D
alfuzosin	CYP3A4
alfuzosin	adra1b
almotriptan	cyp2d6
almotriptan	htr5a
almotriptan	HTR2A
almotriptan	CYP3A4
almotriptan	HTR7
almotriptan	htr2c
almotriptan	HTR6
almotriptan	HTR1D
almotriptan	Htr2b
almotriptan	HTR1A
almotriptan	HTR1E
almotriptan	HTR4
almotriptan	HTR1B
alosetron	kcnh2
alosetron	HTR3A
alosetron	Cyp1a2
alosetron	CYP3A4
alosetron	CYP2E1
alosetron	CYP2C9
aloxi	Casp3
aloxi	CA2
aloxi	GGT4P
aloxi	CTSG
aloxi	CYP2C9
aloxi	ggt2
aloxi	GGTLC3
aloxi	CYP2C19
aloxi	CA1
aloxi	Ptgs1
aloxi	FABP1
aloxi	CYP2C8
aloxi	F2R
aloxi	GGTLC5P
aloxi	itga2b
aloxi	HTR3A
aloxi	PTGS2
aloxi	Os11g0255300
aloxi	ggt1
aloxi	ELANE
alprazolam	CYP3A4
alprazolam	Gabra1
alprazolam	CYP3A7
alprazolam	GABRA5
alprazolam	Gabra2
alprazolam	GABRA4
alprazolam	GABRA3
alprazolam	CCKBR
alprazolam	tspO
alprazolam	Gabra6
alprazolam	CYP3A5
alprostadil	Ptger2
alprostadil	PTGIR
alprostadil	Ptger1
altace	ACE
altocor	CYP3A4
altocor	CYP3A7
altocor	HMGCR
altocor	LOC100009551
altocor	CYP3A5
altocor	CYP2C9
altocor	ICAM1
altocor	rasd1
altocor	CYP2C8
altocor	cyp2d6
altocor	ITGAL
altocor	cyp4f22
altoprev	ICAM1
altoprev	LOC100009551
altoprev	rasd1
altoprev	CYP3A5
altoprev	ITGAL
altoprev	cyp2d6
altoprev	CYP3A4
altoprev	CYP3A7
altoprev	CYP2C8
altoprev	CYP2C9
altoprev	HMGCR
altoprev	cyp4f22
amaryl	ache
amaryl	Kcnj11
amaryl	KCNJ1
amaryl	CYP2C9
amaryl	CYP2C8
ambien	CYP3A5
ambien	GABRA5
ambien	Gabra2
ambien	tspO
ambien	CYP3A7
ambien	GABRA3
ambien	Gabra1
ambien	CYP3A4
ambien	Gabra6
amerge	HTR1A
amerge	HTR1F
amerge	HTR1D
amerge	HTR1B
aminolevulinic	FCGR1C
aminolevulinic	Ldlr
aminolevulinic	Gabrr1
aminolevulinic	ABO_0079
aminolevulinic	fcgr1a
aminolevulinic	Alad
aminophylline	cyp2d6
aminophylline	PDE6C
aminophylline	CYP1A1
aminophylline	ADORA3
aminophylline	hpd
aminophylline	CYP2E1
aminophylline	CHIT1
aminophylline	Cyp1a2
aminophylline	LOC100131909
aminophylline	LOC785098
aminophylline	PDE3A
aminophylline	Pde2a
aminophylline	Adora2a
aminophylline	CYP2C8
aminophylline	PDE5A
aminophylline	PDE4C
aminophylline	Adora2b
aminophylline	CYP1B1
aminophylline	Adora1
aminophylline	CYP2C9
aminophylline	Pde6a
aminophylline	Pde4a
aminophylline	CYP3A4
aminophylline	ADCY2
aminophylline	Pde6b
aminophylline	Pde4b
amiodarone	thrB
amiodarone	CYP3A5
amiodarone	thrA
amiodarone	CYP3A4
amiodarone	cyp2d6
amiodarone	ABCB1
amiodarone	CYP1A1
amiodarone	Cyp1a2
amiodarone	CYP2C9
amiodarone	pxo1_107
amiodarone	CYP3A7
amiodarone	kcnh2
amiodarone	ADRA1A
amiodarone	CYP2C19
amiodarone	ADRB1
amiodarone	CYP2C8
amiodarone	lef
amitiza	CLCN2
amlodipine	ADRA1A
amlodipine	ADRA1D
amlodipine	CYP3A7
amlodipine	cyp2d6
amlodipine	CYP2C8
amlodipine	CYP2C9
amlodipine	Cacna1a
amlodipine	CYP1A1
amlodipine	NOS3
amlodipine	Cyp1a2
amlodipine	CYP3A4
amlodipine	Cacna1b
amlodipine	cyp2a6
amlodipine	CACNG1
amlodipine	NOS2
amlodipine	CYP3A5
amlodipine	Pkc98E
amlodipine	NOS1
amlodipine	adra1b
amlodipine	CYP2B6
amlodipine	CA1
amphotericin	erg28
amprenavir	CYP2B6
amprenavir	CYP2C19
amprenavir	CYP3A7
amprenavir	CYP3A4
amprenavir	CYP2C8
amprenavir	gag-pol
amprenavir	cyp2d6
amprenavir	CYP2C9
amprenavir	CTSD
amprenavir	ABCB1
amprenavir	CYP3A5
amrix	HTR2A
amrix	Cyp1a2
amrix	CYP3A4
amrix	cyp2d6
anafranil	Cyp1a2
anafranil	CYP2D7P1
anafranil	HRH2
anafranil	SLC6A4
anafranil	CYP2C19
anafranil	SLC6A2
anafranil	HTR2A
anafranil	GSTP1
anafranil	CYP3A4
anafranil	DRD2
anafranil	ADCY1
anafranil	cyp2d6
anastrozole	p2ry12
anastrozole	Pde2a
anastrozole	PDE3A
anastrozole	Cyp1a2
androderm	Ar
androderm	shbg
androderm	nppb
androderm	alb
androgel	Ar
androgel	alb
androgel	shbg
androgel	nppb
angiomax	F2
antara	Pld3
antara	PPARA
antara	PLD1
antara	CYP3A4
antara	CYP2C9
antara	CYP2C19
antara	PLD2
antara	PPARG
antara	CYP2C8
antara	Cyp7a1
antara	FABP1
apomorphine	DRD3
apomorphine	DRD2
apomorphine	HTR1A
apomorphine	DRD4
apomorphine	calY
apomorphine	DRD5
apomorphine	COMT
apomorphine	ADRB2
apomorphine	DRD1
apomorphine	TH
apriso	ALOX5
apriso	Ptgs1
apriso	PTGS2
apriso	tpmT
aprotinin	KLK1
aprotinin	CTRB1
aprotinin	Try6
aprotinin	plg
aprotinin	PRSS1
arava	dhodh
arava	NOS2
arava	CYP2C8
arava	ALOX5
arava	CYP2C9
aredia	FDPS
aredia	GGPS1
argatroban	CYP3A5
argatroban	F2
argatroban	CYP3A4
aricept	CYP3A4
aricept	HTR2A
aricept	bchE
aricept	ache
aricept	cyp2d6
aricept	chat
aripiprazole	HTR2A
aripiprazole	CYP3A5
aripiprazole	HTR7
aripiprazole	kcnh2
aripiprazole	CYP3A7
aripiprazole	DRD3
aripiprazole	htr2c
aripiprazole	cyp2d6
aripiprazole	CYP3A4
aripiprazole	DRD2
aripiprazole	Htr2b
aripiprazole	HTR1A
arixtra	serpinc1
arthrotec	PTGIR
arthrotec	akr1c3
asacol	Ptgs1
asacol	ALOX5
asacol	tpmT
asacol	PTGS2
atazanavir	ABCB1
atenolol	ADORA3
atenolol	FABP1
atenolol	ADRB2
atenolol	ADRB1
atenolol	Adrb3
atenolol	CYP3A4
ativan	tspO
ativan	GABRB1
ativan	Gabra6
ativan	GABRA4
ativan	Gabra1
ativan	GABRA3
ativan	GABRB2
ativan	GABRA5
ativan	FABP1
ativan	GABRB3
ativan	Gabra2
atomoxetine	OPRD1
atomoxetine	SLC6A2
atomoxetine	SLC6A4
atomoxetine	cyp2d6
atomoxetine	OPRM1
atomoxetine	kcnh2
atomoxetine	OPRL1
atomoxetine	CYP2D7P1
atomoxetine	slc6a3
atomoxetine	CYP2C19
atomoxetine	CYP3A4
atovaquone	CYP2C9
atovaquone	Uqcrc1
atovaquone	dhodh
atovaquone	PFF0160c
atovaquone	CYTB
atracurium	CHRNA3
atracurium	CHRNA7
atracurium	CHRNB2
atracurium	CHRFAM7A
atracurium	CHRNA2
atrovent	CHRM3
atrovent	CHRM1
atrovent	chrm4
atrovent	Chrm5
atrovent	CHRM2
avelox	kcnh2
avelox	parC
avelox	gyrA
avelox	TOP2A
azasan	IMPDH1
azasan	gmpr
azasan	HPRT1
azasan	Impdh2
azasan	GMPS
azasan	ampd2
azasan	ADSL
azasan	AMPD3
azasan	GMPR2
azasan	PPAT
azasan	AMPD1
azathioprine	PPAT
azathioprine	AMPD1
azathioprine	Impdh2
azathioprine	ampd2
azathioprine	IMPDH1
azathioprine	ADSL
azathioprine	gmpr
azathioprine	GMPS
azathioprine	AMPD3
azathioprine	GMPR2
azathioprine	HPRT1
azelaic acid	LOC100130902
azelaic acid	MJ1097
azelaic acid	TXNRD1
azelaic acid	TYRL
azelaic acid	hba2
azelaic acid	HBB
azelaic acid	ntrA
azelaic acid	HBA1
azelaic acid	tyr
azelaic acid	Srd5a2
azelaic acid	trxB
azelaic acid	polA
azelastine	Cyp1a2
azelastine	CYP2E1
azelastine	cyp2d6
azelastine	CYP2B6
azelastine	cyp2a6
azelastine	CYP2C19
azelastine	CYP2C9
azelastine	HRH1
azelastine	CYP2D7P1
azelastine	CYP3A4
azilect	MAOB
azilect	Cyp1a2
azilect	BCL2
azilect	MAOA
baclofen	BCL2
baclofen	Cyp1a2
baclofen	MAOB
baclofen	MAOA
bactroban	ileS
bactroban	iars
balsalazide	PTGS2
balsalazide	Ptgs1
beclomethasone	ANXA1
beclomethasone	CYP3A5
beclomethasone	SERPINA6
benazepril	ACE
benazepril	Cyp11b2
benzoyl	Cyp2a5
benzoyl	tyr
benzoyl	LOC100009551
benzoyl	ache
benzoyl	Cyp2a21-ps
benzoyl	ptpn1
benzoyl	Cyp2b1
benzoyl	GSK3B
benzoyl	parp1
benzoyl	cyp2a6
benzoyl	Akr1b1-ps2
benzoyl	AKR1B1
benzoyl	Ces2
benzoyl	Hdac1
benzoyl	TYRL
benzoyl	CTSB
benzoyl	IDO1
benzoyl	OBP
benzoyl	bchE
benzoyl	CYB2
benzoyl	CES1
benzoyl	CYP1A1
benzoyl	ALOX5
bexarotene	LOC100047069
bexarotene	rarg
bexarotene	rarA
bexarotene	Rarb
bexarotene	RXRA
bexarotene	CYP2C9
bexarotene	CYP3A4
bexarotene	RXRG
bexarotene	Rxrb
bivalirudin	F2
bortezomib	CYP2C8
bortezomib	psmA2
bortezomib	NFKB2
bortezomib	ICE
bortezomib	CYP3A4
bortezomib	CYP2C19
bortezomib	CTRB1
bortezomib	psmb2
bortezomib	PSMB5
bortezomib	F2
bortezomib	CTSG
bortezomib	psmb1
bortezomib	ELANE
bortezomib	KLK3
bortezomib	Cyp1a2
bortezomib	psd
bortezomib	CYP1A1
bortezomib	CYP2C9
bortezomib	MAPK1
bortezomib	cyp2d6
bortezomib	Psd2
bortezomib	NFKB1
bortezomib	PSMD2
bortezomib	relA
bortezomib	PSMD1
bosentan	Mmp2
bosentan	abcb11
bosentan	nr1i2
bosentan	Pkc98E
bosentan	CYP2C9
bosentan	NOS2
bosentan	ednrb
bosentan	LOC497963
bosentan	EDNRA
bosentan	CYP3A4
budesonide	NR3C1
budesonide	CYP3A4
budesonide	PTGS2
buprenorphine	cyp2a6
buprenorphine	CYP3A4
buprenorphine	CYP2C8
buprenorphine	cyp2d6
buprenorphine	CYP2C19
buprenorphine	OPRM1
buprenorphine	OPRD1
buprenorphine	oprk1
buprenorphine	Cyp1a2
buprenorphine	OPRL1
buprenorphine	CYP2C18
bupropion	slc6a3
bupropion	cyp2a6
bupropion	CYP2E1
bupropion	SLC6A4
bupropion	CYP2B6
bupropion	SLC6A2
bupropion	CYP3A4
bupropion	Cyp1a2
bupropion	CYP2C9
bupropion	cyp2d6
bupropion	CYP2C8
buspirone	ADRA1D
buspirone	CYP3A4
buspirone	DRD3
buspirone	CYP3A5
buspirone	HTR1A
buspirone	htr2c
buspirone	cyp2d6
buspirone	HTR2A
buspirone	SLC6A4
buspirone	DRD2
buspirone	CYP3A7
busulfan	gsta1
busulfan	CYP3A4
butorphanol tartrate	OPRD1
butorphanol tartrate	OPRM1
butorphanol tartrate	oprk1
byetta	GLP1R
calan	Cacna1d
calan	CYP2C19
calan	kcnh2
calan	CYP2C9
calan	CACNA1G
calan	CACNB2
calan	CYP2B6
calan	CYP3A4
calan	Cyp1a2
calan	CACNG1
calan	CACNB1
calan	CA1
calan	CACNB4
calan	CACNA1I
calan	CYP3A5
calan	Cacna1f
calan	ABCB1
calan	Kcnj11
calan	CACNB3
calan	CACNA1C
calan	SCN5A
calan	CYP3A7
calan	cyp2d6
calan	CACNA1S
calan	Abcc2
calan	CYP2C8
calan	LOC100131098
calcitonin	CALCR
campral	Grm5
campral	GRM3
campral	GRM2
campral	GRM1
campral	Grin3a
campral	Gabra1
camptosar	top1mt
camptosar	CYP3A4
camptosar	CYP2B6
camptosar	CYP3A5
camptosar	ABCB1
camptosar	TOP1
camptosar	Abcg2
camptosar	CYP3A7
camptosar	ache
camptosar	Ces2
capecitabine	DPYD
capecitabine	CYP2C9
capecitabine	Tyms
capsaicin	Cyp1a2
capsaicin	CYP1A1
capsaicin	TRPV1
capsaicin	CYP3A4
capsaicin	CYP2C9
capsaicin	CYP2E1
capsaicin	Yars
capsaicin	CYP2B6
capsaicin	CYP2C8
capsaicin	cyp2d6
capsaicin	Cnr2
capsaicin	CYP2C19
capsaicin	Ptgs1
carbamazepine	cyp2d6
carbamazepine	CYP3A7
carbamazepine	CYP2C9
carbamazepine	CYP2B6
carbamazepine	CYP2C8
carbamazepine	SCN9A
carbamazepine	CYP3A5
carbamazepine	CYP2C19
carbamazepine	SCN5A
carbamazepine	PRNP
carbamazepine	CYP3A4
carbamazepine	Cyp1a2
carboplatin	alb
cardizem	cyp2d6
cardizem	CYP3A4
cardizem	Grin3a
cardizem	CACNG1
cardizem	CACNA1S
cardizem	CACNB1
cardizem	GRIN1
cardizem	Cacna1f
cardizem	CACNB4
cardizem	ODC1
cardizem	GRIN2B
cardizem	CYP2C8
cardizem	CYP3A7
cardizem	LOC503456
cardizem	CACNB3
cardizem	Cacna1d
cardizem	CYP3A5
cardizem	CYP2C9
cardizem	CACNA1C
cardizem	LOC100131098
cardizem	kcnh2
cardura	adra1b
cardura	cyp2d6
cardura	ADRA1D
cardura	ADRA2C
cardura	CYP3A4
cardura	ADRA1A
cardura	Adra2a
cardura	Adra2b
cardura	CYP2C19
carisoprodol	CYP2C19
carisoprodol	COMT
carmustine	Cyp1a2
carmustine	gsr
caspofungin	CYP3A4
caspofungin	An06g01550
caverject	PTGIR
cefpodoxime	pbpA
cefpodoxime	Slc15a1
celebrex	CA9
celebrex	CA1
celebrex	akt1
celebrex	Mmp9
celebrex	Ptgs1
celebrex	CAR3
celebrex	PLAU
celebrex	KLK3
celebrex	PDPK1
celebrex	SAA1
celebrex	CYP3A4
celebrex	PTGS2
celebrex	Mmp2
celebrex	cyp2d6
celebrex	ca12
celebrex	LOC100047666
celebrex	CAR1_PREDICTED
celebrex	CA4
celebrex	MMP10
celebrex	Mapk14
celebrex	ALOX5
celebrex	CYP2C9
celebrex	SAA2
celebrex	cox-1
celebrex	CA2
celecoxib	PDPK1
celecoxib	CA2
celecoxib	Mmp2
celecoxib	CAR1_PREDICTED
celecoxib	SAA1
celecoxib	MMP10
celecoxib	SAA2
celecoxib	Mapk14
celecoxib	CA4
celecoxib	cyp2d6
celecoxib	CA1
celecoxib	Mmp9
celecoxib	Ptgs1
celecoxib	ca12
celecoxib	CA9
celecoxib	cox-1
celecoxib	akt1
celecoxib	ALOX5
celecoxib	PLAU
celecoxib	CYP2C9
celecoxib	PTGS2
celecoxib	KLK3
celecoxib	LOC100047666
celecoxib	CYP3A4
celecoxib	CAR3
celexa	CYP2B6
celexa	slc6a3
celexa	CYP3A4
celexa	SLC6A2
celexa	kcnh2
celexa	cyp2d6
celexa	CYP2E1
celexa	CYP2C19
celexa	SLC6A4
celexa	Cyp1a2
cervidil	HPGD
cervidil	Ptger2
cervidil	Ptger1
cervidil	PTGS2
cervidil	PTGIR
cervidil	CYP4F2
cervidil	Cyp1a2
cervidil	PTGES2
cervidil	Ptges3
cervidil	CYP19A1
cervidil	Ptgs1
cervidil	Ptger4
cervidil	PTGER3
cervidil	REN
cetirizine	HRH4
cetirizine	HRH1
cetirizine	kcnh2
cetirizine	CYP3A4
cevimeline	CHRM3
cevimeline	CHRM1
cialis	pde1b
cialis	Pde6a
cialis	PDE9A
cialis	LOC785098
cialis	PDE3A
cialis	PDE4C
cialis	PDE5A
cialis	PDE10A
cialis	CYP3A4
cialis	Pde2a
cialis	Pde4a
cialis	PDE7A
ciclesonide	CYP3A4
ciclesonide	NR3C1
ciclesonide	SERPINA6
cidofovir	ispF
citalopram	CYP2B6
citalopram	SLC6A2
citalopram	Cyp1a2
citalopram	kcnh2
citalopram	SLC6A4
citalopram	CYP3A4
citalopram	cyp2d6
citalopram	slc6a3
citalopram	CYP2C19
citalopram	CYP2E1
clarinex	Cyp1a2
clarinex	CYP3A4
clarinex	CYP2C9
clarinex	CYP2C19
clarinex	HRH1
clarinex	cyp2d6
claritin	HRH1
claritin	kcnh2
claritin	KCNA5
claritin	HRH4
claritin	cyp2d6
claritin	CYP2C9
claritin	CYP3A4
claritin	CYP2C8
claritin	CYP2C19
cleocin	rplJ
cleocin	CYP3A4
climara	CYP1B1
climara	Sts
climara	CYP3A7
climara	Ar
climara	CYP2C19
climara	CYP3A4
climara	CYP2C8
climara	PGR
climara	Esr1
climara	CYP3A5
climara	Cyp1a2
climara	CYP2C9
climara	CYP1A1
climara	nr1i2
climara	ESR2
climara	esrra
climara	CYP19A1
climara	shbg
climara	Hsd17b1
climara	ADRA1A
clindamycin	rplJ
clindamycin	CYP3A4
clobazam	CYP3A4
clobazam	CYP2B6
clobazam	CYP2C18
clobazam	CYP2C19
clobazam	Gabra1
clobetasol	ANXA1
clobetasol	CYP1A1
clobetasol	Cyp1a2
clomid	CYP3A4
clomid	Cyp1a2
clomid	CYP2E1
clomid	Esr1
clomid	CYP1A1
clomid	cyp2a6
clomid	CYP19A1
clomiphene	CYP1A1
clomiphene	CYP3A4
clomiphene	Esr1
clomiphene	cyp2a6
clomiphene	CYP2E1
clomiphene	Cyp1a2
clomiphene	CYP19A1
clomipramine	CYP3A4
clomipramine	CYP2D7P1
clomipramine	DRD2
clomipramine	CYP2C19
clomipramine	SLC6A4
clomipramine	HRH2
clomipramine	SLC6A2
clomipramine	Cyp1a2
clomipramine	HTR2A
clomipramine	cyp2d6
clomipramine	GSTP1
clomipramine	ADCY1
clonazepam	Gabra1
clonazepam	CCKAR
clonazepam	alb
clonazepam	Gabrr1
clonazepam	CYP2B6
clonazepam	CYP3A4
clonazepam	tspO
clonazepam	GABRR2
clonazepam	CCKBR
clonidine	TACR2
clonidine	Adra2a
clonidine	Adra2b
clonidine	MAOA
clonidine	ADRA1D
clonidine	CYP19A1
clonidine	ADRA2C
clozapine	HRH1
clozapine	CYP3A4
clozapine	ADRA2C
clozapine	DRD1
clozapine	CYP2E1
clozapine	cyp2a6
clozapine	CYP2D7P1
clozapine	CYP1B1
clozapine	CYP2C9
clozapine	HTR1A
clozapine	CYP2C19
clozapine	ADRA1D
clozapine	htr2c
clozapine	SLC6A4
clozapine	calY
clozapine	Htr2b
clozapine	HTR7
clozapine	DRD4
clozapine	Adra2a
clozapine	ADORA3
clozapine	CYP1A1
clozapine	CYP2C8
clozapine	htr5a
clozapine	kcnh2
clozapine	DRD5
clozapine	DRD2
clozapine	HRH4
clozapine	cyp2d6
clozapine	HTR2A
clozapine	DRD3
clozapine	CHRM1
clozapine	HTR6
clozapine	HRH3
clozapine	Cyp1a2
clozaril	DRD5
clozaril	HRH1
clozaril	kcnh2
clozaril	CYP2E1
clozaril	CYP2C19
clozaril	CYP2D7P1
clozaril	SLC6A4
clozaril	ADRA1D
clozaril	htr5a
clozaril	Cyp1a2
clozaril	HTR6
clozaril	htr2c
clozaril	DRD2
clozaril	HTR1A
clozaril	ADORA3
clozaril	CYP1A1
clozaril	HTR7
clozaril	HTR2A
clozaril	Htr2b
clozaril	CYP2C9
clozaril	cyp2d6
clozaril	Adra2a
clozaril	DRD1
clozaril	HRH4
clozaril	cyp2a6
clozaril	CYP1B1
clozaril	calY
clozaril	DRD3
clozaril	DRD4
clozaril	CYP2C8
clozaril	CHRM1
clozaril	ADRA2C
clozaril	CYP3A4
clozaril	HRH3
colchicine	CYP2C9
colchicine	CYP1A1
colchicine	ABCB1
colchicine	MEFV
colchicine	tubB
colchicine	TUBBP2
colchicine	TUBBP1
colchicine	CYP2B6
colchicine	CYP3A4
colchicine	CYP2E1
colchicine	TUBA1A
colchicine	Tubb1
colchicine	LOC442308
colchicine	CYP2C8
combivir	tk1
combivir	TERT
combivir	CYP3A4
combivir	CYP2C19
combivir	CYP2C8
combivir	CXCR4
combivir	PRKCB
combivir	CYP2C9
combivir	Prkce
combivir	cyp2a6
combivir	MT3345
combivir	gag-pol
combivir	tmk
combivir	polB
combunox	Ptgs1
combunox	Faah
combunox	CYP2C19
combunox	PTGS2
combunox	CYP2C9
combunox	ALOX5
combunox	FABP1
combunox	alb
combunox	CYP2C8
comtan	CYP2C8
comtan	Cyp1a2
comtan	cyp2d6
comtan	CYP2C19
comtan	cyp2a6
comtan	CYP2C9
comtan	CYP2E1
comtan	COMT
comtan	CYP3A4
concerta	SLC6A4
concerta	slc6a3
concerta	SLC6A2
concerta	cyp2d6
condylox	Ptgs1
condylox	PTGS2
condylox	TUBA1A
condylox	TOP2A
conivaptan	AVPR2
conivaptan	AVPR1A
cordarone	ABCB1
cordarone	pxo1_107
cordarone	CYP3A7
cordarone	Cyp1a2
cordarone	CYP2C9
cordarone	thrB
cordarone	CYP2C8
cordarone	lef
cordarone	CYP2C19
cordarone	kcnh2
cordarone	CYP1A1
cordarone	CYP3A5
cordarone	ADRB1
cordarone	thrA
cordarone	ADRA1A
cordarone	cyp2d6
cordarone	CYP3A4
cozaar	PDE3A
cozaar	CYP2C19
cozaar	CYP3A4
cozaar	CYP2C9
cozaar	CYP3A5
cozaar	Cyp1a2
cozaar	Agtr2
cozaar	PDE4C
cozaar	ACE
cozaar	CYP2C8
cozaar	Agtr1
crinone	CYP17A1
crinone	CYP2C19
crinone	Cyp1a2
crinone	cyp2d6
crinone	CYP21A2
crinone	cyp2a6
crinone	CYP1B1
crinone	Esr1
crinone	cyp4b1
crinone	PGR
crinone	CYP1A1
crinone	CYP3A4
crinone	cyp46a1
crinone	CYP3A5
crinone	CYP2C9
crinone	CYP2C8
crinone	Akr1c1
crinone	CYP3A7
cutivate	NR3C1
cutivate	pla2g4a
cutivate	SERPINA6
cutivate	CYP3A4
cyclobenzaprine	cyp2d6
cyclobenzaprine	Cyp1a2
cyclobenzaprine	CYP3A4
cyclobenzaprine	HTR2A
cyclosporine	CYP3A4
cyclosporine	ABCB1
cyclosporine	LOC439953
cyclosporine	ppiA
cyclosporine	fkbp4
cyclosporine	CYP2C19
cyclosporine	CYP2C9
cyclosporine	cyp2d6
cyclosporine	Abcc2
cyclosporine	PPIAL3
cyclosporine	Cyp1a2
cyclosporine	ppiB
cyclosporine	dhodh
cymbalta	cyp2d6
cymbalta	slc6a3
cymbalta	SLC6A4
cymbalta	HRH3
cymbalta	SLC6A2
cystagon	TAH13
cystagon	sst
cytarabine	cda
cytarabine	uck2
cytarabine	ORF36
cytarabine	DCK
cytarabine	CYP3A4
cytarabine	ispF
cytarabine	polB
cytarabine	cmk
cytarabine	tk1
cytarabine	alb
cytarabine	dnk
dapsone	CYP3A7
dapsone	CYP2C19
dapsone	folP2
dapsone	CYP2C9
dapsone	folP
dapsone	CYP2C8
dapsone	CYP3A4
dapsone	Dhfr
dapsone	CYP2E1
dapsone	CYP3A5
dapsone	CYP2C18
daunorubicin	HSP90AA1
daunorubicin	HSP90AA2
daunorubicin	CYP1A1
daunorubicin	ABCB1
daunorubicin	CYP1B1
daunorubicin	Cyp1a2
daunorubicin	DCXR
daunorubicin	ABCC1
daunorubicin	CYP3A4
daunorubicin	Mmp2
daunoxome	DCXR
daunoxome	Mmp2
daunoxome	ABCB1
daunoxome	CYP1B1
daunoxome	CYP3A4
daunoxome	ABCC1
daunoxome	CYP1A1
daunoxome	Cyp1a2
ddavp	AVPR2
ddavp	AVPR1A
ddavp	AVP
ddavp	AVPR1B
decitabine	TERT
decitabine	Esr1
decitabine	dnmt1
decitabine	PLAU
decitabine	HOS3
decitabine	LOC497963
decitabine	mgmt
decitabine	NOS2
decitabine	Rarb
decitabine	Rrm2b
delavirdine	CYP2C19
delavirdine	CYP2C8
delavirdine	Cyp1a2
delavirdine	CYP2C9
delavirdine	CYP3A4
delavirdine	gag-pol
delavirdine	cyp2d6
denavir	UL30
depacon	AKR1A1
depacon	AKR1B1
depacon	Akr1b1-ps2
depakote	GSK3B
depakote	F3
depakote	cyp2a6
depakote	F2
depakote	hdac9
depakote	HOS3
depakote	CYP4A11
depakote	ACADSB
depakote	GSK3A
depakote	CYP3A4
depakote	CYP2C8
depakote	CYP2C19
depakote	CYP2C9
depakote	Cyp1a2
depakote	CYP2C18
depakote	ABAT
depocyt	DCK
depocyt	CYP3A4
depocyt	ORF36
depocyt	dnk
depocyt	polB
depocyt	tk1
depocyt	alb
depocyt	uck2
desloratadine	Cyp1a2
desloratadine	HRH1
desloratadine	CYP2C19
desloratadine	cyp2d6
desloratadine	CYP2C9
desloratadine	CYP3A4
desmopressin	AVPR1A
desmopressin	AVPR1B
desmopressin	AVP
desmopressin	AVPR2
dexamethasone	NOS2
dexamethasone	relA
dexamethasone	CYP3A7
dexamethasone	nr0b1
dexamethasone	CYP2C19
dexamethasone	CYP3A43
dexamethasone	CYP2C9
dexamethasone	ABCB1
dexamethasone	NFKB2
dexamethasone	CYP2C8
dexamethasone	CYP3A5
dexamethasone	ANXA1
dexamethasone	CYP2E1
dexamethasone	CYP17A1
dexamethasone	CYP3A4
dexamethasone	Ar
dexamethasone	cyp2a6
dexamethasone	PLA2G1B
dexamethasone	CYP2B6
dexamethasone	NR3C1
dexamethasone	CYP1B1
dexamethasone	PTGS2
dexamethasone	CYP1A1
dexamethasone	NFKB1
dexamethasone	CXCL12
dexamethasone	cyp2d6
dexamethasone	FABP1
dexamethasone	Cyp7a1
dexamethasone	Cyp27a1
dexamethasone	CYP19A1
dexamethasone	ALOX5
dexamethasone	CYP4A11
dexamethasone	PGR
dexamethasone	CYP11B1
dexamethasone	NR3C2
dexmedetomidine	ADRA2C
dexmedetomidine	ADRA1D
dexmedetomidine	Adra2a
dexrazoxane	TOP2A
dexrazoxane	DPYS
dexrazoxane	TOP2B
dexrazoxane	TOP2
diclofenac	CYP2B6
diclofenac	CYP3A4
diclofenac	TTR
diclofenac	PTGS2
diclofenac	CA1
diclofenac	CYP2C8
diclofenac	Cyp1a2
diclofenac	Cxcr1
diclofenac	CYP1A1
diclofenac	akr1c3
diclofenac	CYP2C9
diclofenac	CA9
diclofenac	cyp2d6
diclofenac	CYP2C18
diclofenac	IL8
diclofenac	CYP2C19
diclofenac	CYP2E1
diclofenac	CA2
diclofenac	Ptgs1
diclofenac	cyp46a1
diclofenac	FABP1
dicyclomine	CYP1A1
dicyclomine	CHRM1
didanosine	gag-pol
didanosine	pnp
differin	RXRA
differin	rarg
differin	Rxrb
differin	RXRG
differin	Rarb
differin	rarA
dihydroergotamine	HTR2A
dihydroergotamine	HTR1D
dihydroergotamine	HTR1B
dihydroergotamine	CYP3A4
diltiazem	kcnh2
diltiazem	CACNA1S
diltiazem	CACNB3
diltiazem	CYP3A7
diltiazem	LOC100131098
diltiazem	CYP2C8
diltiazem	Cacna1d
diltiazem	CYP2C9
diltiazem	CYP3A5
diltiazem	CACNB1
diltiazem	cyp2d6
diltiazem	Cacna1f
diltiazem	CYP3A4
diltiazem	CACNA1C
diltiazem	CACNG1
diltiazem	CACNB4
dinoprostone	Ptger4
dinoprostone	Ptger2
dinoprostone	HPGD
dinoprostone	Cyp1a2
dinoprostone	REN
dinoprostone	PTGS2
dinoprostone	Ptger1
dinoprostone	PTGER3
dinoprostone	PTGES2
dinoprostone	CYP4F2
dinoprostone	Ptgs1
dinoprostone	CYP19A1
dinoprostone	Ptges3
dinoprostone	PTGIR
diovan	ca12
diovan	CA9
diovan	CYP2C9
diovan	CA2
diovan	Cyp11b2
diovan	Agtr1
diovan	KCNMA1
diovan	CA1
diovan	SLC12A3
diovan	CA4
dipyridamole	Pde6a
dipyridamole	Pde2a
dipyridamole	ABCB1
dipyridamole	PDE6C
dipyridamole	Pde6b
dipyridamole	NOS3
dipyridamole	LOC785098
dipyridamole	ada
dipyridamole	PDE5A
dipyridamole	HSP90AA2
dipyridamole	PDE10A
dipyridamole	NOS1
dipyridamole	NOS2
dipyridamole	PDE4C
dipyridamole	Pde4a
dipyridamole	Slc29a1
dipyridamole	HSP90AA1
divalproex	F3
divalproex	ACADSB
divalproex	ABAT
divalproex	CYP2C19
divalproex	CYP2C18
divalproex	CYP3A4
divalproex	CYP4A11
divalproex	F2
divalproex	Cyp1a2
divalproex	CYP2C8
divalproex	cyp2a6
divalproex	HOS3
divalproex	CYP2C9
divalproex	GSK3A
divalproex	GSK3B
divalproex	hdac9
docetaxel	CYP1B1
docetaxel	CYP3A5
docetaxel	CYP3A4
docetaxel	CYP3A7
docetaxel	BCL2
docetaxel	Tubb1
docetaxel	ABCB1
dofetilide	Kcnj12
dofetilide	LOC100290070
dofetilide	KCNH5
dofetilide	KCNJ18
dofetilide	kcnh2
dofetilide	CYP3A4
dofetilide	KCNK2
dofetilide	LOC100131509
dofetilide	SCN5A
dolasetron	DCXR
dolasetron	CYP2C9
dolasetron	HTR3A
dolasetron	cyp2d6
dolasetron	CYP2C8
dolasetron	CYP3A4
donepezil	bchE
donepezil	chat
donepezil	HTR2A
donepezil	CYP3A4
donepezil	ache
donepezil	cyp2d6
doxazosin	ADRA1D
doxazosin	Adra2b
doxazosin	adra1b
doxazosin	ADRA1A
doxazosin	CYP3A4
doxazosin	Adra2a
doxazosin	CYP2C19
doxazosin	cyp2d6
doxazosin	ADRA2C
doxepin	ADCY1
doxepin	SLC6A4
doxepin	SLC6A2
doxepin	CYP2C19
doxepin	HRH1
doxepin	CYP3A4
doxepin	cyp2d6
doxepin	HRH2
doxepin	CYP2C9
doxepin	Cyp1a2
doxil	TOP2B
doxil	HSP90AA1
doxil	CYP2B6
doxil	DNASE1
doxil	TERT
doxil	CYP3A4
doxil	HSP90AA2
doxil	CYP1B1
doxil	TOP1
doxil	p2ry12
doxil	cyp2d6
doxil	TOP2A
doxorubicin	TOP1
doxorubicin	CYP3A4
doxorubicin	TOP2A
doxorubicin	TOP2B
doxorubicin	DNASE1
doxorubicin	CYP2B6
doxorubicin	cyp2d6
doxorubicin	TERT
doxorubicin	p2ry12
doxorubicin	CYP1B1
doxycycline	CYP3A4
doxycycline	rplJ
doxycycline	rpsD
doxycycline	rpsI
doxycycline	CYP1B1
duloxetine	SLC6A2
duloxetine	cyp2d6
duloxetine	HRH3
duloxetine	SLC6A4
duloxetine	slc6a3
dynacirc	Cacna2d1
dynacirc	CACNA1C
dynacirc	CYP3A4
dynacirc	LOC100131098
efavirenz	Cyp1a2
efavirenz	CYP2C8
efavirenz	CYP2C9
efavirenz	CYP2B6
efavirenz	CYP3A4
efavirenz	CYP2C19
efavirenz	cyp2d6
eletriptan	HTR1F
eletriptan	HTR1E
eletriptan	cyp2a6
eletriptan	cyp2d6
eletriptan	Htr2b
eletriptan	HTR7
eletriptan	CYP3A4
eletriptan	HTR1D
eletriptan	HTR1A
eletriptan	HTR1B
elidel	FKBP1A
elidel	Ppp3r1
ellence	CHD1
ellence	TOP2A
emsam	MAOB
emsam	CYP2E1
emsam	MAOA
emsam	CYP2B6
emsam	CYP3A4
emsam	cyp2a6
emsam	CYP2C8
emsam	Cyp1a2
emsam	CYP2C9
emsam	CYP2C19
emsam	cyp2d6
enablex	chrm4
enablex	CHRM2
enablex	Chrm5
enablex	CHRM3
enablex	CHRM1
enalapril	KCNMA1
enalapril	SLC12A3
enalapril	CYP3A4
enalapril	ca12
enalapril	ACE
enalapril	CA4
enalapril	CA1
enalapril	CA9
enalapril	CA2
enfuvirtide	DPYD
enoxaparin	F10
enoxaparin	fgfr3
enoxaparin	SELP
enoxaparin	serpind1
enoxaparin	serpinc1
enoxaparin	HPSE
enoxaparin	F2
enoxaparin	F9
entacapone	CYP2C8
entacapone	CYP2E1
entacapone	cyp2d6
entacapone	cyp2a6
entacapone	Cyp1a2
entacapone	CYP2C9
entacapone	COMT
entacapone	CYP2C19
entacapone	CYP3A4
epirubicin	CHD1
epirubicin	TOP2A
eplerenone	CYP3A5
eplerenone	NR3C1
eplerenone	Ar
eplerenone	CYP3A4
eplerenone	Esr1
eplerenone	NR3C2
eplerenone	PGR
eplerenone	CYP3A7
eplerenone	Cyp11b2
epoprostenol	p2ry12
epoprostenol	CYP2C9
epoprostenol	PTGS2
epoprostenol	PTGIR
epoprostenol	MAPK1
epoprostenol	Ptgs1
eprosartan	Agtr1
eprosartan	CYP2C9
eprosartan	CYP2C8
eptifibatide	ITGB3
eptifibatide	itga2b
equetro	CYP2C19
equetro	Cyp1a2
equetro	SCN5A
equetro	SCN9A
equetro	PRNP
equetro	CYP3A7
equetro	CYP2B6
equetro	cyp2d6
equetro	CYP2C9
equetro	CYP3A4
equetro	CYP2C8
equetro	CYP3A5
ergamisol	alb
ergamisol	unc-63
ergamisol	ALPI
ergamisol	Akp3
ergamisol	Alppl2
escitalopram	cyp2d6
escitalopram	CYP2C19
escitalopram	CYP3A4
escitalopram	SLC6A4
estazolam	CYP3A4
estazolam	tspO
estradiol	CYP3A7
estradiol	Esr1
estradiol	CYP2C19
estradiol	Sts
estradiol	shbg
estradiol	Hsd17b1
estradiol	Ar
estradiol	esrra
estradiol	Cyp1a2
estradiol	nr1i2
estradiol	ESR2
estradiol	CYP3A4
estradiol	CYP1A1
estradiol	CYP3A5
estradiol	CYP2C9
estradiol	CYP2C8
estradiol	CYP1B1
estring	CYP3A7
estring	esrra
estring	ESR2
estring	CYP2C8
estring	CYP3A4
estring	CYP1B1
estring	CYP3A5
estring	CYP2C19
estring	Sts
estring	shbg
estring	Esr1
estring	Hsd17b1
estring	nr1i2
estring	Cyp1a2
estring	CYP1A1
estring	CYP2C9
estring	Ar
estrogens	shbg
estrogens	Ar
estrogens	CYP3A4
estrogens	CYP2C8
estrogens	CYP2C19
estrogens	esrra
estrogens	Cyp1a2
estrogens	Esr1
estrogens	CYP2C9
estrogens	ESR2
estrogens	CYP1A1
estrogens	PGR
estrogens	Hsd17b1
estrogens	Sts
estrogens	CYP3A5
estrogens	CYP1B1
estrogens	CYP3A7
estrogens	nr1i2
estrogens	NR3C2
estrogens	NR3C1
eszopiclone	CYP2E1
eszopiclone	CYP3A4
eszopiclone	CYP2C8
eszopiclone	CYP2C9
eszopiclone	tspO
eszopiclone	Gabra6
etonogestrel	PGR
etonogestrel	CYP3A4
etonogestrel	Esr1
etonogestrel	CYP2C19
etonogestrel	Ar
etoposide	TOP2A
etoposide	CYP3A4
etoposide	MAP2K7
etoposide	CYP3A5
etoposide	Cyp1a2
etoposide	Abcc3
etoposide	ABCB1
etoposide	TOP1
etoposide	CYP2E1
etoposide	CYP2C8
etoposide	TOP2B
etoposide	Abcc2
etoposide	CYP2C9
etoposide	ABCC1
evista	CYP3A4
evista	Esr1
evista	CYP19A1
evista	CYP2C8
evista	ESR2
evoxac	CHRM3
evoxac	CHRM1
exelon	ache
exelon	cyp2d6
exelon	SLC6A4
exelon	CYP3A4
exelon	bchE
exemestane	CYP3A4
exemestane	CYP19A1
extina	hmox1
extina	CYP21A2
extina	PTGS2
extina	CYP11B1
extina	Hmox2
extina	CYP2F1
extina	CYP51A1
extina	CYP2C8
extina	CYP2B6
extina	CYP3A5
extina	kcnh2
extina	ABCB1
extina	CYP19A1
extina	CYP4F2
extina	cyp2a6
extina	CYP17A1
extina	CYP3A7
extina	Cyp4a10
extina	CYP1B1
extina	Cyp11b2
extina	Cyp24a1
extina	PLA2G1B
extina	CYP2C9
extina	Cyp4a1
extina	Cyp2c
extina	Cyp1a2
extina	Cyp2b1
extina	ALOX5
extina	CYP2C19
extina	erg11
extina	CYP3A4
extina	CYP1A1
extina	cyp2d6
extina	Cyp26a1
famciclovir	CYP3A4
famciclovir	ORF28
famciclovir	UL30
famvir	ORF28
famvir	UL30
famvir	CYP3A4
fareston	CYP3A4
fareston	Esr1
fareston	Cyp1a2
fareston	ESR2
fareston	CYP1A1
febuxostat	XDH
felbamate	GRIA1
felbamate	Grin3a
felbamate	GRIN2A
felbamate	CYP3A4
felbamate	GRIN2B
felbamate	CYP2E1
felbamate	CYP2C19
felbatol	CYP3A4
felbatol	GRIN2A
felbatol	GRIA1
felbatol	CYP2C19
felbatol	GRIN2B
felbatol	CYP2E1
felbatol	Grin3a
femara	Esr1
femara	CYP19A1
femara	Erbb2
femara	CYP3A4
femara	CYP2C19
femara	cyp2a6
femara	CA2
fenofibrate	Cyp7a1
fenofibrate	CYP2C19
fenofibrate	PLD2
fenofibrate	CYP2C8
fenofibrate	Ppard
fenofibrate	PPARG
fenofibrate	CYP2C9
fenofibrate	PLD1
fenofibrate	Pld3
fenofibrate	CYP3A4
fenofibrate	FABP1
fenofibrate	PPARA
fenoglide	PLD2
fenoglide	FABP1
fenoglide	Pld3
fenoglide	PLD1
fenoglide	CYP3A4
fenoglide	Cyp7a1
fenoglide	CYP2C19
fenoglide	CYP2C8
fenoglide	CYP2C9
fenoglide	PPARA
fenoglide	PPARG
fentanyl	CYP3A4
fentanyl	CYP3A5
fentanyl	OPRM1
fentanyl	MAOA
fentanyl	oprk1
fentanyl	OPRD1
fentanyl	CYP3A7
fexmid	CYP3A4
fexmid	Cyp1a2
fexmid	cyp2d6
fexmid	HTR2A
fexofenadine	HRH4
fexofenadine	cyp2d6
fexofenadine	HRH1
fexofenadine	ABCB1
fexofenadine	SLCO1A2
fexofenadine	kcnh2
fexofenadine	BMP1
fexofenadine	CYP3A4
finacea	HBA1
finacea	trxB
finacea	HBB
finacea	hba2
finacea	polA
finacea	ntrA
finacea	Srd5a2
finacea	tyr
finacea	TYRL
finacea	TXNRD1
finacea	MJ1097
finacea	LOC100130902
flecainide	kcnh2
flecainide	CYP2C9
flecainide	Cyp1a2
flecainide	cyp2d6
flecainide	KCNA5
flecainide	SCN5A
flexeril	cyp2d6
flexeril	Cyp1a2
flexeril	HTR2A
flexeril	CYP3A4
flolan	CYP2C9
flolan	p2ry12
flomax	ADRA1A
flomax	DRD3
flomax	DRD2
flomax	ADRA1D
flomax	Adra2a
flomax	ADRA2C
flomax	HTR7
flomax	CYP3A4
flomax	adra1b
flomax	HTR1A
flomax	ORM1
flomax	cyp2d6
floxin	parC
floxin	TOP2B
floxin	TOP2A
floxin	Cyp1a2
floxin	gyrB
floxin	SP_1937
floxin	gyrA
floxin	kcnh2
fludarabine	ada
fludarabine	STAT1
fludarabine	polA1
fludarabine	MTOR
fludarabine	BCL2
fludarabine	Rrm1
fluocinolone	pla2g4a
fluocinolone	SERPINA6
fluorouracil	UMPS
fluorouracil	DPYD
fluorouracil	Cyp1a2
fluorouracil	udp
fluorouracil	cyp2a6
fluorouracil	Tyms
fluorouracil	ICE
fluorouracil	CYP2C8
fluorouracil	CYP2C9
fluoxetine	CYP2B6
fluoxetine	CYP2C9
fluoxetine	SLC18A2
fluoxetine	DRD2
fluoxetine	cyp2d6
fluoxetine	Cyp1a2
fluoxetine	CYP2E1
fluoxetine	CYP2C19
fluoxetine	CYP2D7P1
fluoxetine	kcnh2
fluoxetine	SLC6A4
fluoxetine	CYP3A4
fluoxetine	MAOB
fluoxetine	slc6a3
fluoxetine	SLC6A2
fluoxetine	CYP2C8
fluoxetine	HRH3
fluoxetine	htr2c
fluoxetine	ache
flutamide	CYP2C19
flutamide	Cyp1a2
flutamide	CYP3A5
flutamide	Ar
flutamide	CYP3A4
flutamide	CYP1A1
flutamide	CYP1B1
fluticasone	NR3C1
fluticasone	pla2g4a
fluticasone	SERPINA6
fluticasone	CYP3A4
fluvoxamine	CYP2C19
fluvoxamine	Cyp1a2
fluvoxamine	HTR1A
fluvoxamine	slc6a3
fluvoxamine	cyp2d6
fluvoxamine	SLC18A2
fluvoxamine	HTR2A
fluvoxamine	CYP2C8
fluvoxamine	CYP2C9
fluvoxamine	CYP1A1
fluvoxamine	CYP2B6
fluvoxamine	CYP3A5
fluvoxamine	CYP2E1
fluvoxamine	SLC6A4
fluvoxamine	CYP3A4
fluvoxamine	CYP3A7
focalin	slc6a3
fondaparinux	serpinc1
fortical	CALCR
fosamax	PIK3CA
fosamax	GGPS1
fosamax	PTPN4
fosamax	FDPS
fosamprenavir	CYP2C19
fosamprenavir	CYP3A4
fosamprenavir	CYP2C8
fosamprenavir	CYP2C9
foscarnet	CA4
foscarnet	CD9
foscarnet	CA1
foscarnet	CA2
foscarnet	polA1
foscarnet	ORF28
foscarnet	CA9
foscarnet	UL30
foscarnet	Pold1
foscarnet	TERT
foscarnet	gag-pol
foscarnet	ca12
foscavir	Pold1
foscavir	CD9
foscavir	polA1
foscavir	gag-pol
foscavir	CA9
foscavir	CA1
foscavir	TERT
foscavir	CA2
foscavir	ORF28
foscavir	ca12
foscavir	UL30
foscavir	CA4
frova	HTR1A
frova	HTR1B
frova	HTR1D
frova	Cyp1a2
frovatriptan	Cyp1a2
frovatriptan	HTR1A
frovatriptan	HTR1D
frovatriptan	HTR1B
fuzeon	DPYD
gabapentin	SCN5A
gabapentin	Cacna2d1
gabapentin	Gabbr2
gabapentin	Cacna1b
gabapentin	Grin3a
gabapentin	BCAT1
gabapentin	Adra2a
gabapentin	Adora1
gabapentin	SLC7A5
gabapentin	CACNA2D2
gabitril	SLC6A11
gabitril	SLC6A1
gabitril	SLC6A12
gabitril	SLC6A13
gabitril	CYP3A4
gabitril	ABAT
gadobenic acid	alb
galantamine	CYP2D7P1
galantamine	cyp2d6
galantamine	ache
galantamine	CYP3A4
galantamine	bchE
gefitinib	Src
gefitinib	prkcq
gefitinib	CYP2C19
gefitinib	prkaa2
gefitinib	IGF1R
gefitinib	RET
gefitinib	FLT1
gefitinib	HCK
gefitinib	PIK3CA
gefitinib	EPHA2
gefitinib	KDR
gefitinib	CSNK1G2
gefitinib	XIAP
gefitinib	Map2k2
gefitinib	Mapk14
gefitinib	CSNK2A1P
gefitinib	PRKACA
gefitinib	KLK3
gefitinib	pdgfra
gefitinib	PRKAA1
gefitinib	Fgfr1
gefitinib	PDPK1
gefitinib	CSK
gefitinib	LOC100271831
gefitinib	egfr
gefitinib	MAPK3
gefitinib	Tgfbr2
gefitinib	Acvrl1
gefitinib	MAPKAPK2
gefitinib	GSK3A
gefitinib	tyro3
gefitinib	YES1
gefitinib	LOC652799
gefitinib	cyp2d6
gefitinib	PTK2B
gefitinib	Abcg2
gefitinib	MAP2K4
gefitinib	cdk8
gefitinib	PLK1
gefitinib	Pim1
gefitinib	CYP3A4
gefitinib	GSK3B
gefitinib	MAPK12
gefitinib	ITK
[truncated: 5,298 more rows]
