# Supplementary material for: Identifying the causative proteins of similar side effect pairs to explore the common molecular basis of these side effects
Source: Royal Society of Chemistry journal article supplement (doi:10.1039/c5mb00242g), 2015-04-28
Supplement: c5mb00242g3.xlsx [file c5mb00242g3.xlsx]

## Sheet: Sheet1
ICD code	disease category
1	Certain infectious and parasitic diseases
2	Neoplasms
3	Diseases of the blood and blood-forming organs and certain disorders involving the immune mechanism
4	Endocrine, nutritional and metabolic diseases
5	Mental and behavioural disorders
6	Diseases of the nervous system
7	Diseases of the eye and adnexa
8	Diseases of the ear and mastoid process
9	Diseases of the circulatory system
10	Diseases of the respiratory system
11	Diseases of the digestive system
12	Diseases of the skin and subcutaneous tissue
13	Diseases of the musculoskeletal system and connective tissue
14	Diseases of the genitourinary system
15	Pregnancy, childbirth and the puerperium
16	Certain conditions originating in the perinatal period
17	Congenital malformations, deformations and chromosomal abnormalities
18	Symptoms, signs and abnormal clinical and laboratory findings, not elsewhere classified
19	Injury, poisoning and certain other consequences of external causes
20	External causes of morbidity and mortality
21	Factors influencing health status and contact with health services
22	Codes for special purposes
val_pub indicates validation results from published literatures and databases.
val_ICD indicates validation results from ICD disease classification system.
ADR pair	causative protein	val_pub1	val_pub2	val_ICD1	val_ICD2
abdominal pain, ache	AKT1	0	14	6	12, 6
abdominal pain, ache	TRH	10	20	11	12
abdominal pain, ache	POMC	0	20	11	12
abdominal pain, ache	CSF2	3	0	11	12
abdominal pain, ache	NTSR1	0	0	11, 6	12, 6
abdominal pain, ache	TAC1	0	12	11, 6	12, 6
abdominal pain, ache	PROKR1	0	6	11, 6	12, 6
abdominal pain, ache	EDN1	0	0	11, 6	12, 6
abdominal pain, ache	PLCB1	0	0	11, 6	12, 6
abdominal pain, ache	OPRK1	0	10	11, 6	12, 6
abdominal pain, ache	HTR7	9	2	11, 6	12, 6
abdominal pain, ache	PNOC	0	3	11, 6	12, 6
abdominal pain, ache	ADM	0	20	11, 6	12, 6
abdominal pain, ache	DRD2	20	9	11, 6	12, 6
abdominal pain, ache	IL2	20	15	11, 6	12, 6
abdominal pain, ache	HTR1A	20	3	11, 6	12, 6
abdominal pain, ache	ALB	0	20	NA	NA
abdominal pain, ache	CRH	0	20	NA	NA
abdominal pain, ache	SLC9A1	0	2	NA	NA
abdominal pain, ache	PENK	20	12	NA	NA
abdominal pain, ache	PDYN	20	14	NA	NA
abdominal pain, ache	OXT	0	19	NA	NA
abdominal pain, ache	HCRT	1	5	NA	NA
abdominal pain, ache	BDKRB1	20	2	NA	NA
abdominal pain, ache	BDKRB2	20	20	NA	NA
abdominal pain, ache	KNG1	19	0	NA	NA
abdominal pain, anxiety	HTR2A	0	Database	11, 6	5, 6
abdominal pain, anxiety	HTR3C	0	Database	11, 6	5, 6
abdominal pain, anxiety	HTR2B	0	Database	11, 6	5, 6
abdominal pain, anxiety	HTR3B	0	Database	11, 6	5, 6
abdominal pain, anxiety	ADRA2A	0	Database	NA	NA
abdominal pain, anxiety	ADRA2C	0	13	NA	NA
abdominal pain, back pain	GABRA5	0	0	11	——
abdominal pain, back pain	GABRA6	0	0	11	——
abdominal pain, back pain	GABRA1	0	0	11	——
abdominal pain, back pain	GABRA3	0	0	11	——
abdominal pain, back pain	GABRA2	0	2	11	——
abdominal pain, cough	HTR2A	0	0	11, 6	6
abdominal pain, cough	HTR2C	0	0	11, 6	6
abdominal pain, cough	HTR1A	0	0	11, 6	6
abdominal pain, cough	DRD4	0	0	11, 6	10, 6
abdominal pain, cough	DRD2	0	0	11, 6	10, 6
abdominal pain, cough	DRD3	0	0	11, 6	10, 6
abdominal pain, cough	ADRA2C	0	0	NA	NA
abdominal pain, dyspnea	ADRA1D	0	0	6	9, 6
abdominal pain, dyspnea	HTR7	0	0	11, 6	6
abdominal pain, dyspnea	HTR6	0	0	11, 6	6
abdominal pain, dyspnea	HTR2A	0	0	11, 6	6
abdominal pain, dyspnea	HTR2C	0	0	11, 6	6
abdominal pain, dyspnea	HTR1A	0	0	11, 6	6
abdominal pain, dyspnea	ADRA1A	3	2	11, 6	9, 10, 6
abdominal pain, dyspnea	DRD4	0	0	11, 6	9, 10, 6
abdominal pain, dyspnea	DRD2	0	0	11, 6	9, 10, 6
abdominal pain, dyspnea	DRD3	0	0	11, 6	9, 10, 6
abdominal pain, dyspnea	CHRM1	0	0	11, 6	9, 10, 6
abdominal pain, dyspnea	DRD1	0	0	11, 6	9, 10, 6
abdominal pain, dyspnea	ADRB1	0	4	NA	NA
abdominal pain, dyspnea	HRH1	0	0	NA	NA
abdominal pain, headache	CACNA1I	0	Database	——	——
abdominal pain, headache	CACNA1C	0	Database	——	——
abdominal pain, headache	CACNA1D	0	Database	——	——
abdominal pain, headache	CACNA1F	20	Database	——	——
abdominal pain, headache	CACNA1G	2	Database	——	——
abdominal pain, headache	GNRH1	0	Database	——	——
abdominal pain, headache	CACNA1S	0	Database	——	——
abdominal pain, headache	CACNA1H	0	Database	11, 6	5, 6
abdominal pain, headache	OXT	0	Database	NA	NA
abdominal pain, vomiting	ESR2	2	Database	6	7, 6
abdominal pain, vomiting	ESR1	0	Database	6	7, 6
abdominal pain, vomiting	IFNG	0	Database	6	7, 6
abdominal pain, vomiting	IFNA2	Database	Database	6	7, 6
abdominal pain, vomiting	PDE4A	0	Database	11	11, 7
abdominal pain, vomiting	PDE4B	15	Database	11	11, 7
abdominal pain, vomiting	PDE4C	2	Database	11	11, 7
abdominal pain, vomiting	PDE4D	0	Database	11	11, 7
abdominal pain, vomiting	GNRH1	9	Database	——	7
abdominal pain, vomiting	ADCY1	20	Database	11, 6	11, 7, 6
abdominal pain, vomiting	HTR3B	20	Database	11, 6	11, 7, 6
abdominal pain, vomiting	HTR3C	0	Database	11, 6	11, 7, 6
abdominal pain, vomiting	TACR1	0	Database	NA	NA
ache, vomiting	GNRH1	0	Database	12	7
ache, vomiting	TRH	2	0	12	11, 7
ache, vomiting	POMC	0	0	12	11, 7
ache, vomiting	CSF2	16	0	12	11, 7
ache, vomiting	PDE4A	0	Database	12	11, 7
ache, vomiting	PDE4B	0	Database	12	11, 7
ache, vomiting	PDE4C	0	Database	12	11, 7
ache, vomiting	PDE4D	0	Database	12	11, 7
ache, vomiting	NTSR1	0	20	12, 6	11, 7, 6
ache, vomiting	TAC1	0	0	12, 6	11, 7, 6
ache, vomiting	PROKR1	0	0	12, 6	11, 7, 6
ache, vomiting	EDN1	0	0	12, 6	11, 7, 6
ache, vomiting	HTR3B	0	Database	12, 6	11, 7, 6
ache, vomiting	PLCB1	0	0	12, 6	11, 7, 6
ache, vomiting	OPRK1	0	0	12, 6	11, 7, 6
ache, vomiting	HTR7	20	0	12, 6	11, 7, 6
ache, vomiting	PNOC	0	0	12, 6	11, 7, 6
ache, vomiting	ADM	20	2	12, 6	11, 7, 6
ache, vomiting	ADCY1	20	Database	12, 6	11, 7, 6
ache, vomiting	DRD2	20	0	12, 6	11, 7, 6
ache, vomiting	IL2	0	0	12, 6	11, 7, 6
ache, vomiting	HTR3C	0	Database	12, 6	11, 7, 6
ache, vomiting	HTR1A	0	3	12, 6	11, 7, 6
ache, vomiting	AKT1	20	0	12, 6	7, 6
ache, vomiting	IFNG	0	Database	12, 6	7, 6
ache, vomiting	ESR2	20	Database	12, 6	7, 6
ache, vomiting	ESR1	20	Database	12, 6	7, 6
ache, vomiting	IFNA2	20	Database	12, 6	7, 6
ache, vomiting	GCH1	0	0	NA	NA
ache, vomiting	ALB	0	20	NA	NA
ache, vomiting	CRH	0	0	NA	NA
ache, vomiting	SLC9A1	2	0	NA	NA
ache, vomiting	PENK	9	0	NA	NA
ache, vomiting	PDYN	6	0	NA	NA
ache, vomiting	OXT	0	0	NA	NA
ache, vomiting	HCRT	20	0	NA	NA
ache, vomiting	TACR1	20	Database	NA	NA
ache, vomiting	BDKRB1	20	0	NA	NA
ache, vomiting	BDKRB2	20	2	NA	NA
ache, vomiting	KNG1	4	0	NA	NA
allergy, urticaria	HLA-DPB1	0	Database	12	12
allergy, urticaria	ICAM1	0	Database	12	12
allergy, urticaria	IL18	2	Database	3, 12	3, 12
allergy, urticaria	HLA-DRB1	0	Database	3, 12	3, 12
allergy, urticaria	TGFB1	0	Database	3, 12	3, 12
allergy, urticaria	PRKCB	0	0	3, 12	3, 12
allergy, urticaria	CHUK	5	0	3, 12	3, 12
allergy, urticaria	TNF	0	Database	3, 12	3, 12
allergy, urticaria	VCAM1	0	Database	3, 12	3, 12
allergy, urticaria	IL1B	0	Database	3, 12	3, 12
allergy, urticaria	ALB	2	Database	NA	NA
allergy, urticaria	HLA-DQB1	3	Database	NA	NA
anemia, anorexia	ESR1	0	Database	3	6
anemia, anorexia	CACNA1H	0	Database	3	11, 6
anemia, anorexia	ADCY1	0	Database	3	11, 6
anemia, anorexia	CACNA1I	20	Database	3	——
anemia, anorexia	CACNA1G	20	Database	3	——
anemia, anorexia	PDE4A	0	Database	——	11
anemia, anorexia	PDE4B	0	Database	——	11
anemia, anorexia	PDE4C	2	Database	——	11
anemia, anorexia	PDE4D	4	Database	——	11
anemia, anorexia	ESR2	20	Database	9, 3	6
anemia, anorexia	ADK	Database	0	9, 3	11, 6
anemia, anorexia	ADA	2	3	NA	NA
anemia, anorexia	TOP1	0	0	NA	NA
anemia, anorexia	TOP2A	0	0	NA	NA
anemia, diarrhea	TOP1	4	0	NA	NA
anemia, diarrhea	TOP2A	20	20	NA	NA
anemia, fever	TOP1	4	4	NA	NA
anemia, fever	TOP2A	6	0	NA	NA
anemia, leukopenia	IL2	0	Database	3	3
anemia, leukopenia	IL3	0	Database	3	3
anemia, leukopenia	SCN1B	2	Database	9, 3	3
anemia, leukopenia	TOP1	0	0	NA	NA
anemia, leukopenia	SCN2B	0	Database	NA	NA
anemia, leukopenia	TOP2B	0	0	NA	NA
anemia, leukopenia	SCN3B	0	Database	NA	NA
anemia, leukopenia	TOP2A	2	0	NA	NA
anemia, nausea	CACNA1I	0	Database	3	7
anemia, nausea	CACNA1G	10	Database	3	7
anemia, nausea	CACNA1H	0	Database	3	11, 7, 6
anemia, nausea	ADCY1	20	Database	3	11, 7, 6
anemia, nausea	HTR2B	0	Database	3	11, 7, 6
anemia, nausea	HTR2A	0	Database	3	11, 7, 6
anemia, nausea	HTR3B	0	Database	3	11, 7, 6
anemia, nausea	HTR3C	0	Database	3	11, 7, 6
anemia, nausea	HTR1A	20	Database	3	11, 7, 6
anemia, nausea	ESR1	0	Database	3	7, 6
anemia, nausea	IFNG	6	Database	3	7, 6
anemia, nausea	IFNA2	0	Database	3	7, 6
anemia, nausea	POMC	0	Database	——	11, 7
anemia, nausea	PDE4A	0	Database	——	11, 7
anemia, nausea	PDE4B	20	Database	——	11, 7
anemia, nausea	PDE4C	0	Database	——	11, 7
anemia, nausea	PDE4D	0	Database	——	11, 7
anemia, nausea	ADK	Database	0	9, 3	11, 7, 6
anemia, nausea	ESR2	0	Database	9, 3	7, 6
anemia, nausea	TOP1	0	0	NA	NA
anemia, nausea	TOP2A	0	0	NA	NA
anemia, thrombocytopenia	ITGB3	0	Database	3	3
anemia, thrombocytopenia	ITGA2B	0	Database	3	3
anemia, thrombocytopenia	PF4	0	Database	3	3
anemia, thrombocytopenia	IL3	16	Database	3	3
anemia, thrombocytopenia	CSF2	0	Database	——	——
anemia, thrombocytopenia	ALB	0	Database	NA	NA
anemia, thrombocytopenia	GP1BB	0	Database	NA	NA
anemia, thrombocytopenia	GP9	2	Database	NA	NA
anemia, vomiting	GNRH1	0	Database	3	7
anemia, vomiting	ADCY1	0	Database	3	11, 7, 6
anemia, vomiting	HTR3B	12	Database	3	11, 7, 6
anemia, vomiting	HTR3C	5	Database	3	11, 7, 6
anemia, vomiting	ESR1	0	Database	3	7, 6
anemia, vomiting	IFNG	8	Database	3	7, 6
anemia, vomiting	IFNA2	4	Database	3	7, 6
anemia, vomiting	PDE4A	0	Database	——	11, 7
anemia, vomiting	PDE4B	2	Database	——	11, 7
anemia, vomiting	PDE4C	0	Database	——	11, 7
anemia, vomiting	PDE4D	0	Database	——	11, 7
anemia, vomiting	ADK	Database	0	9, 3	11, 7, 6
anemia, vomiting	ESR2	0	Database	9, 3	7, 6
anemia, vomiting	TOP1	0	0	NA	NA
anemia, vomiting	TACR1	0	Database	NA	NA
anemia, vomiting	TOP2A	0	Database	NA	NA
anorexia, asthenic	ESR1	Database	19	6	6
anorexia, asthenic	ESR2	Database	10	6	9, 6
anorexia, asthenic	PDE4A	Database	20	11	5
anorexia, asthenic	PDE4B	Database	3	11	5
anorexia, asthenic	PDE4C	Database	5	11	5
anorexia, asthenic	PDE4D	Database	2	11	5
anorexia, asthenic	CACNA1I	Database	0	——	——
anorexia, asthenic	CACNA1G	Database	2	——	——
anorexia, asthenic	CACNA1H	Database	12	11, 6	5, 6
anorexia, asthenic	ADCY1	Database	14	11, 6	5, 6
anorexia, constipation	ESR2	Database	0	6	——
anorexia, constipation	ESR1	Database	20	6	——
anorexia, constipation	POMC	0	Database	11	11
anorexia, constipation	PDE4A	Database	0	11	11
anorexia, constipation	PDE4B	Database	0	11	11
anorexia, constipation	PDE4C	Database	0	11	11
anorexia, constipation	PDE4D	Database	20	11	11
anorexia, constipation	CACNA1I	Database	10	——	——
anorexia, constipation	CACNA1S	16	Database	——	——
anorexia, constipation	CACNA1C	0	Database	——	——
anorexia, constipation	CACNA1D	0	Database	——	——
anorexia, constipation	CACNA1G	Database	0	——	——
anorexia, constipation	CACNA1H	Database	20	11, 6	11
anorexia, constipation	ADCY1	Database	3	11, 6	11
anorexia, constipation	GCG	0	Database	11, 6	11
anorexia, constipation	BCHE	Database	0	NA	NA
anorexia, diarrhea	ESR2	Database	0	6	——
anorexia, diarrhea	ESR1	Database	0	6	——
anorexia, diarrhea	PDE4A	Database	0	11	11
anorexia, diarrhea	PDE4B	Database	0	11	11
anorexia, diarrhea	PDE4C	Database	0	11	11
anorexia, diarrhea	PDE4D	Database	0	11	11
anorexia, diarrhea	CACNA1I	Database	0	——	——
anorexia, diarrhea	CACNA1G	Database	0	——	——
anorexia, diarrhea	CACNA1H	Database	5	11, 6	11
anorexia, diarrhea	ADCY1	Database	0	11, 6	11
anorexia, dizziness	ESR1	Database	0	6	6
anorexia, dizziness	ESR2	Database	2	6	9, 6
anorexia, dizziness	PDE4A	Database	0	11	——
anorexia, dizziness	PDE4B	Database	0	11	——
anorexia, dizziness	PDE4C	Database	0	11	——
anorexia, dizziness	PDE4D	Database	0	11	——
anorexia, dizziness	CACNA1I	Database	0	——	——
anorexia, dizziness	CACNA1G	Database	0	——	——
anorexia, dizziness	CACNA1H	Database	0	11, 6	6
anorexia, dizziness	ADCY1	Database	Database	11, 6	6
anorexia, dizziness	HTR1A	0	Database	11, 6	6
anorexia, dyspnea	ESR1	Database	0	6	6
anorexia, dyspnea	ESR2	Database	3	6	9, 6
anorexia, dyspnea	PDE4A	Database	0	11	——
anorexia, dyspnea	PDE4B	Database	0	11	——
anorexia, dyspnea	PDE4C	Database	0	11	——
anorexia, dyspnea	PDE4D	Database	0	11	——
anorexia, dyspnea	CACNA1I	Database	0	——	——
anorexia, dyspnea	CACNA1G	Database	0	——	——
anorexia, dyspnea	CACNA1H	Database	0	11, 6	6
anorexia, dyspnea	ADCY1	Database	3	11, 6	6
anorexia, dyspnea	HTR1A	5	0	11, 6	6
anorexia, dyspnea	DRD2	0	0	11, 6	9, 10, 6
anorexia, dyspnea	DRD3	10	0	11, 6	9, 10, 6
anorexia, dyspnea	DRD1	19	0	11, 6	9, 10, 6
anorexia, leukopenia	ESR2	Database	20	6	3
anorexia, leukopenia	ESR1	Database	3	6	3
anorexia, leukopenia	PDE4A	Database	0	11	——
anorexia, leukopenia	PDE4B	Database	20	11	——
anorexia, leukopenia	PDE4C	Database	0	11	——
anorexia, leukopenia	PDE4D	Database	0	11	——
anorexia, leukopenia	CACNA1I	Database	1	——	3
anorexia, leukopenia	CACNA1G	Database	0	——	3
anorexia, leukopenia	CACNA1H	Database	3	11, 6	3
anorexia, leukopenia	ADCY1	Database	0	11, 6	3
anorexia, leukopenia	IL2	0	Database	11, 6	3
anorexia, leukopenia	SCN1B	0	Database	11, 6	3
anorexia, leukopenia	IL3	10	Database	11, 6	3
anorexia, leukopenia	TOP1	0	0	NA	NA
anorexia, leukopenia	SCN2B	0	Database	NA	NA
anorexia, leukopenia	SCN3B	20	Database	NA	NA
anorexia, leukopenia	TOP2A	0	5	NA	NA
anorexia, nausea	ESR2	Database	Database	6	7, 6
anorexia, nausea	ESR1	Database	Database	6	7, 6
anorexia, nausea	IFNG	2	Database	6	7, 6
anorexia, nausea	IFNA2	5	Database	6	7, 6
anorexia, nausea	POMC	0	Database	11	11, 7
anorexia, nausea	PDE4A	Database	Database	11	11, 7
anorexia, nausea	PDE4B	Database	Database	11	11, 7
anorexia, nausea	PDE4C	Database	Database	11	11, 7
anorexia, nausea	PDE4D	Database	Database	11	11, 7
anorexia, nausea	CACNA1I	Database	Database	——	7
anorexia, nausea	CACNA1G	Database	Database	——	7
anorexia, nausea	CACNA1H	Database	Database	11, 6	11, 7, 6
anorexia, nausea	ADCY1	Database	Database	11, 6	11, 7, 6
anorexia, nausea	HTR2B	0	Database	11, 6	11, 7, 6
anorexia, nausea	HTR2A	0	Database	11, 6	11, 7, 6
anorexia, nausea	HTR3B	0	Database	11, 6	11, 7, 6
anorexia, nausea	HTR3C	0	Database	11, 6	11, 7, 6
anorexia, nausea	HTR1A	12	Database	11, 6	11, 7, 6
anorexia, thrombocytopenia	ESR1	Database	0	6	3
anorexia, thrombocytopenia	ESR2	Database	0	6	9, 3
anorexia, thrombocytopenia	CSF2	2	Database	11	——
anorexia, thrombocytopenia	PDE4A	Database	2	11	——
anorexia, thrombocytopenia	PDE4B	Database	2	11	——
anorexia, thrombocytopenia	PDE4C	Database	0	11	——
anorexia, thrombocytopenia	PDE4D	Database	0	11	——
anorexia, thrombocytopenia	CACNA1I	Database	2	——	3
anorexia, thrombocytopenia	CACNA1G	Database	0	——	3
anorexia, thrombocytopenia	CACNA1H	Database	0	11, 6	3
anorexia, thrombocytopenia	ITGB3	4	Database	11, 6	3
anorexia, thrombocytopenia	ADCY1	Database	5	11, 6	3
anorexia, thrombocytopenia	ITGA2B	0	Database	11, 6	3
anorexia, thrombocytopenia	PF4	20	Database	11, 6	3
anorexia, thrombocytopenia	IL3	2	Database	11, 6	3
anorexia, thrombocytopenia	ALB	0	Database	NA	NA
anorexia, thrombocytopenia	GP1BB	4	Database	NA	NA
anorexia, thrombocytopenia	ITPA	0	Database	NA	NA
anorexia, thrombocytopenia	GP9	0	Database	NA	NA
anorexia, tiredness	ESR2	Database	4	6	6
anorexia, tiredness	ESR1	Database	5	6	6
anorexia, tiredness	PDE4A	Database	0	11	5
anorexia, tiredness	PDE4B	Database	0	11	5
anorexia, tiredness	PDE4C	Database	0	11	5
anorexia, tiredness	PDE4D	Database	2	11	5
anorexia, tiredness	CACNA1I	Database	3	——	——
anorexia, tiredness	CACNA1G	Database	0	——	——
anorexia, tiredness	CACNA1H	Database	20	11, 6	5, 6
anorexia, tiredness	ADCY1	Database	0	11, 6	5, 6
anorexia, vomiting	ESR2	Database	Database	6	7, 6
anorexia, vomiting	ESR1	Database	Database	6	7, 6
anorexia, vomiting	IFNG	0	Database	6	7, 6
anorexia, vomiting	IFNA2	0	Database	6	7, 6
anorexia, vomiting	PDE4A	Database	Database	11	11, 7
anorexia, vomiting	PDE4B	Database	Database	11	11, 7
anorexia, vomiting	PDE4C	Database	Database	11	11, 7
anorexia, vomiting	PDE4D	Database	Database	11	11, 7
anorexia, vomiting	CACNA1I	Database	20	——	7
anorexia, vomiting	CACNA1G	Database	4	——	7
anorexia, vomiting	GNRH1	2	Database	——	7
anorexia, vomiting	CACNA1H	Database	10	11, 6	11, 7, 6
anorexia, vomiting	ADCY1	Database	Database	11, 6	11, 7, 6
anorexia, vomiting	HTR3B	7	Database	11, 6	11, 7, 6
anorexia, vomiting	HTR3C	0	Database	11, 6	11, 7, 6
anorexia, vomiting	TACR1	0	Database	NA	NA
anxiety, asthenic	HTR2A	Database	0	5, 6	5, 6
anxiety, asthenic	HTR3B	Database	2	5, 6	5, 6
anxiety, asthenic	HTR3C	Database	4	5, 6	5, 6
anxiety, asthenic	HTR2B	Database	2	5, 6	5, 6
anxiety, chest pain	ADRA1D	0	20	6	9, 6
anxiety, chest pain	HTR6	0	20	5, 6	6
anxiety, chest pain	HTR7	20	0	5, 6	6
anxiety, chest pain	HTR2A	Database	0	5, 6	6
anxiety, chest pain	HTR3C	Database	0	5, 6	6
anxiety, chest pain	HTR2B	Database	4	5, 6	6
anxiety, chest pain	HTR3B	Database	4	5, 6	6
anxiety, chest pain	DRD2	0	2	5, 6	9, 10, 6
anxiety, chest pain	DRD3	17	20	5, 6	9, 10, 6
anxiety, chest pain	ADRA2A	Database	0	NA	NA
anxiety, chest pain	CRH	20	Database	NA	NA
anxiety, dyspnea	HTR3B	Database	0	5, 6	6
anxiety, dyspnea	HTR2B	Database	2	5, 6	6
anxiety, dyspnea	HTR6	0	0	5, 6	6
anxiety, dyspnea	HTR7	0	0	5, 6	6
anxiety, dyspnea	HTR2A	Database	0	5, 6	6
anxiety, dyspnea	HTR3C	Database	6	5, 6	6
anxiety, dyspnea	HTR2C	16	19	5, 6	6
anxiety, dyspnea	HTR1A	0	0	5, 6	6
anxiety, dyspnea	DRD2	0	0	5, 6	9, 10, 6
anxiety, dyspnea	DRD3	0	0	5, 6	9, 10, 6
anxiety, dyspnea	DRD1	0	0	5, 6	9, 10, 6
anxiety, dyspnea	CYP3A7	0	0	5, 6	9, 6
anxiety, dyspnea	CYP3A5	0	13	5, 6	9, 6
anxiety, dyspnea	ADRA2A	Database	0	NA	NA
anxiety, paresthesias	HTR2A	Database	0	5, 6	6
anxiety, paresthesias	HTR3B	Database	0	5, 6	6
anxiety, paresthesias	HTR3C	Database	0	5, 6	6
anxiety, paresthesias	HTR2B	Database	0	5, 6	6
anxiety, somnolence	ADRA1D	20	0	6	6
anxiety, somnolence	DRD4	2	2	5, 6	5, 6
anxiety, somnolence	DRD2	0	0	5, 6	5, 6
anxiety, somnolence	DRD3	6	5	5, 6	5, 6
anxiety, somnolence	HTR2A	Database	0	5, 6	5, 6
anxiety, somnolence	HTR3C	Database	0	5, 6	5, 6
anxiety, somnolence	HTR2B	Database	0	5, 6	5, 6
anxiety, somnolence	HTR3B	Database	0	5, 6	5, 6
anxiety, somnolence	HTR1A	0	0	5, 6	5, 6
anxiety, somnolence	ADRA2A	Database	20	NA	NA
anxiety, somnolence	ADRA2C	0	0	NA	NA
anxiety, sweating	ADRA1D	0	0	6	6
anxiety, sweating	CHRM1	0	20	5, 6	6
anxiety, sweating	HTR2A	Database	5	5, 6	6
anxiety, sweating	HTR3C	Database	0	5, 6	6
anxiety, sweating	HTR2B	Database	2	5, 6	6
anxiety, sweating	HTR3B	Database	4	5, 6	6
anxiety, sweating	ADRA2A	Database	0	NA	NA
anxiety, sweating	ADRA2C	0	3	NA	NA
anxiety, sweating	ADRB1	2	10	NA	NA
arthralgias, back pain	GABRA5	2	0	——	——
arthralgias, back pain	GABRA6	16	0	——	——
arthralgias, back pain	GABRA1	0	2	——	——
arthralgias, back pain	GABRA3	0	13	——	——
arthralgias, back pain	GABRA2	0	0	——	——
arthralgias, back pain	CYP3A5	0	5	13, 6	9, 13, 6
arthralgias, back pain	CYP3A7	0	0	13, 6	9, 13, 6
arthralgias, constipation	GMPS	0	0	6	11
arthralgias, constipation	POMC	0	Database	——	11
arthralgias, constipation	CACNA1D	20	Database	——	——
arthralgias, constipation	CACNA1C	0	Database	——	——
arthralgias, constipation	CACNA1S	0	Database	——	——
arthralgias, constipation	GCG	7	Database	13, 6	11
arthralgias, constipation	DRD2	0	16	13, 6	11
arthralgias, constipation	DRD3	0	0	13, 6	11
arthralgias, constipation	DRD1	0	0	13, 6	11
arthralgias, constipation	HTR1A	0	20	13, 6	11
arthralgias, constipation	TK1	0	0	13, 6	11
arthralgias, constipation	PPAT	0	0	13, 6	11
arthralgias, constipation	UCK2	0	0	13, 6	11
arthralgias, constipation	TYMP	0	0	NA	NA
arthralgias, constipation	QARS	0	0	NA	NA
arthralgias, constipation	PNP	0	0	NA	NA
arthralgias, constipation	CDA	0	0	NA	NA
arthralgias, constipation	IMPDH1	0	0	NA	NA
arthralgias, constipation	ASNS	0	0	NA	NA
arthralgias, constipation	CTPS	0	0	NA	NA
arthralgias, constipation	RRM2B	0	0	NA	NA
arthralgias, constipation	TYMS	0	0	NA	NA
arthralgias, constipation	IMPDH2	0	0	NA	NA
arthralgias, constipation	UMPS	0	0	NA	NA
arthralgias, constipation	RRM1	0	0	NA	NA
arthralgias, cough	HTR1A	0	0	13, 6	6
arthralgias, cough	DRD3	0	0	13, 6	10, 6
arthralgias, dyspnea	HTR6	0	0	13, 6	6
arthralgias, dyspnea	HTR7	4	0	13, 6	6
arthralgias, dyspnea	HTR2C	0	2	13, 6	6
arthralgias, dyspnea	HTR1A	0	0	13, 6	6
arthralgias, dyspnea	DRD4	0	0	13, 6	9, 10, 6
arthralgias, dyspnea	DRD2	0	0	13, 6	9, 10, 6
arthralgias, dyspnea	DRD3	0	0	13, 6	9, 10, 6
arthralgias, dyspnea	CHRM1	0	0	13, 6	9, 10, 6
arthralgias, dyspnea	DRD1	0	14	13, 6	9, 10, 6
arthralgias, dyspnea	CHRM2	0	2	13, 6	9, 10, 6
arthralgias, dyspnea	ADRA1B	0	0	13, 6	9, 6
arthralgias, dyspnea	ADRA1D	0	0	13, 6	9, 6
arthralgias, dyspnea	ADRA2A	0	0	NA	NA
arthralgias, dyspnea	ADRA2C	0	0	NA	NA
aspartate aminotransferase increased, elevated alt	PDGFRB	0	0	11	11
aspartate aminotransferase increased, elevated alt	PDGFRA	0	0	11	11
aspartate aminotransferase increased, elevated alt	PTK2	0	0	11	11
aspartate aminotransferase increased, elevated alt	ACVR1	0	3	11	11
aspartate aminotransferase increased, elevated alt	TGFBR2	0	0	11	11
aspartate aminotransferase increased, elevated alt	CSF1R	0	0	11	11
aspartate aminotransferase increased, elevated alt	MAPK14	6	0	11	11
aspartate aminotransferase increased, elevated alt	MAP2K2	0	0	11	11
aspartate aminotransferase increased, elevated alt	MAP2K1	20	0	11	11
aspartate aminotransferase increased, elevated alt	LCK	0	0	11	11
aspartate aminotransferase increased, elevated alt	MAPK10	0	0	11	11
aspartate aminotransferase increased, elevated alt	MAPK12	0	0	11	11
aspartate aminotransferase increased, elevated alt	MAP2K4	0	0	11	11
aspartate aminotransferase increased, elevated alt	ABL1	0	0	11	11
aspartate aminotransferase increased, elevated alt	FLT4	20	13	11	11
aspartate aminotransferase increased, elevated alt	ABL2	0	0	11	11
aspartate aminotransferase increased, elevated alt	MAPKAPK2	0	0	11	11
aspartate aminotransferase increased, elevated alt	YES1	0	0	11	11
aspartate aminotransferase increased, elevated alt	FLT1	0	0	11	11
aspartate aminotransferase increased, elevated alt	JAK3	0	0	11	11
aspartate aminotransferase increased, elevated alt	TUBA1A	0	0	11	11
aspartate aminotransferase increased, elevated alt	ACVR1B	0	12	11	11
aspartate aminotransferase increased, elevated alt	FYN	0	0	11	11
aspartate aminotransferase increased, elevated alt	NTRK1	14	0	11	11
aspartate aminotransferase increased, elevated alt	FLT3	20	0	11	11
aspartate aminotransferase increased, elevated alt	MAPK3	0	2	11	11
aspartate aminotransferase increased, elevated alt	MAPK1	0	12	11	11
aspartate aminotransferase increased, elevated alt	ZAP70	0	0	11	11
aspartate aminotransferase increased, elevated alt	ERBB2	0	0	11	11
aspartate aminotransferase increased, elevated alt	SRC	0	0	11	11
aspartate aminotransferase increased, elevated alt	IGF1R	0	0	11	11
aspartate aminotransferase increased, elevated alt	CSK	0	0	11	11
aspartate aminotransferase increased, elevated alt	PRKCA	0	1	11	11
aspartate aminotransferase increased, elevated alt	PRKACB	0	0	11	11
aspartate aminotransferase increased, elevated alt	PRKCE	0	0	11	11
aspartate aminotransferase increased, elevated alt	PRKAA2	0	0	11	11
aspartate aminotransferase increased, elevated alt	DAPK1	0	3	11	11
aspartate aminotransferase increased, elevated alt	PRKAA1	0	7	11	11
aspartate aminotransferase increased, elevated alt	ACVRL1	0	0	11	11
aspartate aminotransferase increased, elevated alt	CDK9	0	0	11	11
aspartate aminotransferase increased, elevated alt	PRKCQ	0	0	11	11
aspartate aminotransferase increased, elevated alt	HCK	0	0	11	11
aspartate aminotransferase increased, elevated alt	FGFR2	13	0	11	11
aspartate aminotransferase increased, elevated alt	FGFR3	0	0	11	11
aspartate aminotransferase increased, elevated alt	TYRO3	2	0	11	11
aspartate aminotransferase increased, elevated alt	FGFR1	0	0	11	11
aspartate aminotransferase increased, elevated alt	TNK2	0	0	11	11
aspartate aminotransferase increased, elevated alt	ABCG2	0	2	11	11
aspartate aminotransferase increased, elevated alt	RPS6KA5	9	0	11	11
aspartate aminotransferase increased, elevated alt	SYK	0	0	11	11
aspartate aminotransferase increased, elevated alt	INSR	0	0	11	11
aspartate aminotransferase increased, elevated alt	PTK2B	2	0	11	11
aspartate aminotransferase increased, elevated alt	KIT	0	0	11	11
aspartate aminotransferase increased, elevated alt	MET	0	0	11	11
aspartate aminotransferase increased, elevated alt	CDK2	0	0	11	11
aspartate aminotransferase increased, elevated alt	PRKACA	0	0	11	11
aspartate aminotransferase increased, elevated alt	CDK5	20	0	11	11
aspartate aminotransferase increased, elevated alt	CDK7	0	0	11	11
aspartate aminotransferase increased, elevated alt	CDK8	0	0	11	11
aspartate aminotransferase increased, elevated alt	PDPK1	0	0	11	11
aspartate aminotransferase increased, elevated alt	PRKD1	0	0	11	11
aspartate aminotransferase increased, elevated alt	BTK	0	0	11	11
aspartate aminotransferase increased, elevated alt	AKT1	0	0	——	——
aspartate aminotransferase increased, elevated alt	PLK1	0	7	NA	NA
aspartate aminotransferase increased, elevated alt	EGFR	0	3	NA	NA
aspartate aminotransferase increased, elevated alt	EPHA2	0	0	NA	NA
aspartate aminotransferase increased, elevated alt	RET	0	0	NA	NA
aspartate aminotransferase increased, elevated alt	RIPK1	0	0	NA	NA
aspartate aminotransferase increased, elevated alt	PIK3CA	0	3	NA	NA
aspartate aminotransferase increased, elevated alt	JAK2	0	0	NA	NA
aspartate aminotransferase increased, elevated alt	AURKA	0	0	NA	NA
aspartate aminotransferase increased, elevated alt	WEE1	0	0	NA	NA
aspartate aminotransferase increased, elevated alt	GSK3B	0	0	NA	NA
aspartate aminotransferase increased, elevated alt	KDR	0	0	NA	NA
aspartate aminotransferase increased, elevated alt	EPHB1	0	0	NA	NA
aspartate aminotransferase increased, elevated alt	PIM1	0	0	NA	NA
aspartate aminotransferase increased, elevated alt	ITK	0	0	NA	NA
aspartate aminotransferase increased, elevated alt	GSK3A	0	0	NA	NA
aspartate aminotransferase increased, elevated alt	CSNK2A1	0	0	NA	NA
asthenic, cough	HTR1A	0	0	5, 6	6
asthenic, cough	DRD4	0	0	9, 5, 6	10, 6
asthenic, cough	DRD2	0	0	9, 5, 6	10, 6
asthenic, cough	DRD3	8	0	9, 5, 6	10, 6
asthenic, dyspnea	HTR6	0	0	5, 6	6
asthenic, dyspnea	HTR7	2	0	5, 6	6
asthenic, dyspnea	HTR2A	20	2	5, 6	6
asthenic, dyspnea	HTR2C	11	0	5, 6	6
asthenic, dyspnea	HTR1A	6	0	5, 6	6
asthenic, dyspnea	DRD4	2	0	9, 5, 6	9, 10, 6
asthenic, dyspnea	DRD2	0	0	9, 5, 6	9, 10, 6
asthenic, dyspnea	DRD3	4	0	9, 5, 6	9, 10, 6
asthenic, dyspnea	CHRM1	3	0	9, 5, 6	9, 10, 6
asthenic, dyspnea	DRD1	20	0	9, 5, 6	9, 10, 6
asthenic, oedema	ESR1	0	Database	6	7
asthenic, oedema	ESR2	2	Database	9, 6	9, 15, 7
asthenic, rhinitis	IL4	0	Database	5, 6	——
asthenic, rhinitis	IL13	0	Database	5, 6	——
asthenic, somnolence	HTR2A	0	2	5, 6	5, 6
asthenic, somnolence	HTR2C	0	0	5, 6	5, 6
asthenic, somnolence	HTR1A	0	2	5, 6	5, 6
asthenic, somnolence	DRD4	0	0	9, 5, 6	5, 6
asthenic, somnolence	DRD2	0	0	9, 5, 6	5, 6
asthenic, somnolence	DRD3	0	0	9, 5, 6	5, 6
back pain, cough	GRM1	0	0	9, 13, 6	10, 6
back pain, cough	GRM2	20	0	9, 13, 6	10, 6
back pain, cough	GRM3	0	0	9, 13, 6	10, 6
back pain, indigestion	GABRA5	3	0	——	11
back pain, indigestion	GABRA6	0	0	——	11
back pain, indigestion	GABRA1	0	4	——	11
back pain, indigestion	GABRA3	13	20	——	11
back pain, indigestion	GABRA2	0	0	——	11
back pain, myalgia	GABRA5	0	7	——	——
back pain, myalgia	GABRA6	0	11	——	——
back pain, myalgia	GABRA1	0	0	——	——
back pain, myalgia	GABRA3	0	0	——	——
back pain, myalgia	GABRA2	0	2	——	——
back pain, myalgia	CYP3A5	5	2	9, 13, 6	13, 6
back pain, myalgia	CYP3A7	4	0	9, 13, 6	13, 6
back pain, pharyngitis	HTR1A	0	20	13, 6	——
back pain, pharyngitis	ADRA2A	0	2	NA	NA
back pain, sinusitis	GABRA5	2	0	——	12
back pain, sinusitis	GABRA6	0	0	——	12
back pain, sinusitis	GABRA3	0	14	——	12
back pain, sinusitis	GABRA2	0	5	——	12
back pain, sinusitis	PIP	0	Database	9, 13, 6	12
back pain, sinusitis	AZGP1	3	Database	9, 13, 6	10, 12
bronchitis, sinusitis	GRIN2B	0	0	10	10, 12
bronchitis, sinusitis	AZGP1	0	Database	10	10, 12
bronchitis, sinusitis	GRIA1	0	0	10	10, 12
bronchitis, sinusitis	GRIN2A	2	0	10	10, 12
bronchitis, sinusitis	PIP	5	Database	——	12
bronchitis, sinusitis	CES1	0	0	NA	NA
bronchitis, sinusitis	CES2	0	0	NA	NA
chest pain, dyspnea	HTR6	0	20	6	6
chest pain, dyspnea	HTR7	4	0	6	6
chest pain, dyspnea	HTR2A	0	0	6	6
chest pain, dyspnea	HTR2C	18	0	6	6
chest pain, dyspnea	HTR1A	0	0	6	6
chest pain, dyspnea	ADRA1A	0	7	9, 10, 6	9, 10, 6
chest pain, dyspnea	DRD4	20	0	9, 10, 6	9, 10, 6
chest pain, dyspnea	DRD2	0	0	9, 10, 6	9, 10, 6
chest pain, dyspnea	DRD3	20	0	9, 10, 6	9, 10, 6
chest pain, dyspnea	CHRM1	0	2	9, 10, 6	9, 10, 6
chest pain, dyspnea	DRD1	0	3	9, 10, 6	9, 10, 6
chest pain, dyspnea	ADRA1B	3	0	9, 6	9, 6
chest pain, dyspnea	ADRA1D	20	0	9, 6	9, 6
chest pain, dyspnea	CYP2D6	2	0	9, 6	9, 6
chest pain, dyspnea	CYP3A7	20	0	9, 6	9, 6
chest pain, dyspnea	CYP3A4	0	0	9, 6	9, 6
chest pain, dyspnea	ADRA2C	0	0	NA	NA
chest pain, dyspnea	ADRA2A	0	2	NA	NA
chest pain, dyspnea	CRH	Database	0	NA	NA
chest pain, oedema	ESR1	0	Database	6	7
chest pain, oedema	ESR2	0	Database	9, 6	9, 15, 7
confusional state, hallucination	DRD5	0	13	5, 6	5
confusional state, hallucination	CALY	0	0	NA	NA
constipation, dizziness	ADCY1	5	Database	11	6
constipation, dizziness	HTR1A	0	Database	11	6
constipation, dizziness	GCG	Database	0	11	9, 6
constipation, dizziness	POMC	Database	6	11	——
constipation, dizziness	CACNA1C	Database	2	——	——
constipation, dizziness	CACNA1D	Database	13	——	——
constipation, dizziness	CACNA1S	Database	0	——	——
constipation, dizziness	BCHE	0	Database	NA	NA
constipation, dyspnea	GRM1	3	0	11	9, 10, 6
constipation, dyspnea	GRM2	20	0	11	9, 10, 6
constipation, dyspnea	GRM3	0	7	11	9, 10, 6
constipation, dyspnea	GCG	Database	0	11	9, 6
constipation, dyspnea	POMC	Database	0	11	——
constipation, dyspnea	CACNA1C	Database	0	——	——
constipation, dyspnea	CACNA1D	Database	0	——	——
constipation, dyspnea	CACNA1S	Database	10	——	——
constipation, fever	GCG	Database	0	11	3
constipation, fever	POMC	Database	0	11	——
constipation, fever	CACNA1C	Database	0	——	3
constipation, fever	CACNA1S	Database	0	——	3
constipation, fever	CACNA1D	Database	0	——	3
constipation, headache	POMC	Database	0	11	5
constipation, headache	CACNA1H	0	Database	11	5, 6
constipation, headache	GCG	Database	20	11	5, 6
constipation, headache	DRD3	0	0	11	5, 6
constipation, headache	HTR1A	0	Database	11	5, 6
constipation, headache	CACNA1I	0	Database	——	——
constipation, headache	CACNA1C	Database	Database	——	——
constipation, headache	CACNA1D	Database	Database	——	——
constipation, headache	CACNA1F	0	Database	——	——
constipation, headache	CACNA1G	0	Database	——	——
constipation, headache	GNRH1	0	Database	——	——
constipation, headache	CACNA1S	Database	Database	——	——
constipation, headache	OXT	0	Database	NA	NA
constipation, nausea	POMC	Database	Database	11	11, 7
constipation, nausea	PDE4A	0	Database	11	11, 7
constipation, nausea	PDE4B	6	Database	11	11, 7
constipation, nausea	PDE4C	0	Database	11	11, 7
constipation, nausea	PDE4D	7	Database	11	11, 7
constipation, nausea	CACNA1H	0	Database	11	11, 7, 6
constipation, nausea	HTR2A	0	Database	11	11, 7, 6
constipation, nausea	HTR2B	0	Database	11	11, 7, 6
constipation, nausea	GCG	Database	0	11	11, 7, 6
constipation, nausea	ADCY1	0	Database	11	11, 7, 6
constipation, nausea	DRD3	0	20	11	11, 7, 6
constipation, nausea	HTR3B	0	Database	11	11, 7, 6
constipation, nausea	HTR3C	0	Database	11	11, 7, 6
constipation, nausea	HTR1A	0	Database	11	11, 7, 6
constipation, nausea	CACNA1I	7	Database	——	7
constipation, nausea	CACNA1C	Database	0	——	7
constipation, nausea	CACNA1D	Database	0	——	7
constipation, nausea	CACNA1G	0	Database	——	7
constipation, nausea	CACNA1S	Database	4	——	7
constipation, nausea	IFNG	0	Database	——	7, 6
constipation, nausea	ESR2	20	Database	——	7, 6
constipation, nausea	ESR1	0	Database	——	7, 6
constipation, nausea	IFNA2	0	Database	——	7, 6
constipation, nausea	BCHE	4	Database	NA	NA
constipation, somnolence	POMC	Database	2	11	5
constipation, somnolence	GCG	Database	10	11	5, 6
constipation, somnolence	DRD2	20	0	11	5, 6
constipation, somnolence	DRD3	0	2	11	5, 6
constipation, somnolence	DRD1	0	4	11	5, 6
constipation, somnolence	HTR1A	16	20	11	5, 6
constipation, somnolence	CACNA1D	Database	20	——	——
constipation, somnolence	CACNA1C	Database	5	——	——
constipation, somnolence	CACNA1S	Database	7	——	——
constipation, sweating	GCG	Database	0	11	6
constipation, sweating	CYP2B6	0	16	11	6
constipation, sweating	CYP2E1	0	0	11	6
constipation, sweating	POMC	Database	5	11	——
constipation, sweating	CACNA1C	Database	0	——	——
constipation, sweating	CACNA1D	Database	2	——	——
constipation, sweating	CACNA1S	Database	0	——	——
constipation, tiredness	POMC	Database	0	11	5
constipation, tiredness	GCG	Database	0	11	5, 6
constipation, tiredness	DRD3	0	0	11	5, 6
constipation, tiredness	HTR2A	0	0	11	5, 6
constipation, tiredness	HTR1A	2	0	11	5, 6
constipation, tiredness	CACNA1C	Database	0	——	——
constipation, tiredness	CACNA1D	Database	20	——	——
constipation, tiredness	CACNA1S	Database	3	——	——
constipation, vomiting	POMC	Database	0	11	11, 7
constipation, vomiting	PDE4A	0	Database	11	11, 7
constipation, vomiting	PDE4B	3	Database	11	11, 7
constipation, vomiting	PDE4C	0	Database	11	11, 7
constipation, vomiting	PDE4D	0	Database	11	11, 7
constipation, vomiting	ADCY1	9	Database	11	11, 7, 6
constipation, vomiting	GCG	Database	0	11	11, 7, 6
constipation, vomiting	HTR3B	0	Database	11	11, 7, 6
constipation, vomiting	HTR2A	0	20	11	11, 7, 6
constipation, vomiting	HTR3C	0	Database	11	11, 7, 6
constipation, vomiting	HTR1A	4	0	11	11, 7, 6
constipation, vomiting	CACNA1S	Database	0	——	7
constipation, vomiting	CACNA1D	Database	0	——	7
constipation, vomiting	CACNA1C	Database	0	——	7
constipation, vomiting	GNRH1	0	Database	——	7
constipation, vomiting	ESR2	0	Database	——	7, 6
constipation, vomiting	ESR1	0	Database	——	7, 6
constipation, vomiting	IFNG	0	Database	——	7, 6
constipation, vomiting	IFNA2	0	Database	——	7, 6
constipation, vomiting	BCHE	0	Database	NA	NA
constipation, vomiting	TACR1	0	Database	NA	NA
cough, dyspnea	GRM1	0	20	10, 6	9, 10, 6
cough, dyspnea	GRM2	0	20	10, 6	9, 10, 6
cough, dyspnea	GRM3	0	3	10, 6	9, 10, 6
cough, infections	HTR1A	0	0	6	——
cough, infections	GABRA1	0	0	——	——
cough, infections	DRD4	0	0	10, 6	——
cough, infections	DRD2	0	0	10, 6	——
cough, infections	DRD3	0	0	10, 6	——
cough, myalgia	CYP2D6	0	20	6	13, 6
cough, myalgia	CYP3A4	0	0	6	13, 6
cough, myalgia	HTR1A	0	20	6	13, 6
cough, myalgia	MAOB	0	2	——	——
cough, myalgia	DRD4	0	5	10, 6	13, 6
cough, myalgia	DRD2	0	0	10, 6	13, 6
cough, myalgia	DRD3	0	2	10, 6	13, 6
cough, myalgia	ADRA2C	0	4	NA	NA
cough, myalgia	MAOA	0	7	NA	NA
cough, oedema	ESR1	0	Database	6	7
cough, oedema	ESR2	20	Database	6	9, 15, 7
cough, pharyngitis	HTR1A	0	0	6	——
cough, pharyngitis	DRD3	0	20	10, 6	10
diarrhea, ache	TRH	0	0	11	12
diarrhea, ache	POMC	0	0	11	12
diarrhea, ache	CSF2	0	0	11	12
diarrhea, ache	NTSR1	0	0	11	12, 6
diarrhea, ache	TAC1	2	0	11	12, 6
diarrhea, ache	PROKR1	0	0	11	12, 6
diarrhea, ache	EDN1	0	0	11	12, 6
diarrhea, ache	PLCB1	0	0	11	12, 6
diarrhea, ache	OPRK1	0	0	11	12, 6
diarrhea, ache	HTR7	0	0	11	12, 6
diarrhea, ache	PNOC	0	0	11	12, 6
diarrhea, ache	ADM	0	0	11	12, 6
diarrhea, ache	DRD2	0	0	11	12, 6
diarrhea, ache	IL2	0	0	11	12, 6
diarrhea, ache	HTR1A	3	0	11	12, 6
diarrhea, ache	AKT1	7	0	——	12, 6
diarrhea, ache	ALB	2	0	NA	NA
diarrhea, ache	CRH	0	0	NA	NA
diarrhea, ache	SLC9A1	19	0	NA	NA
diarrhea, ache	PENK	0	0	NA	NA
diarrhea, ache	PDYN	0	0	NA	NA
diarrhea, ache	OXT	0	0	NA	NA
diarrhea, ache	HCRT	0	0	NA	NA
diarrhea, ache	BDKRB1	0	0	NA	NA
diarrhea, ache	BDKRB2	3	0	NA	NA
diarrhea, ache	KNG1	0	20	NA	NA
diarrhea, dyspnea	HTR1A	0	4	11	6
diarrhea, dyspnea	DRD2	13	0	11	9, 10, 6
diarrhea, dyspnea	DRD3	0	0	11	9, 10, 6
diarrhea, headache	CACNA1H	0	Database	11	5, 6
diarrhea, headache	CACNA1I	0	Database	——	——
diarrhea, headache	CACNA1C	20	Database	——	——
diarrhea, headache	CACNA1D	20	Database	——	——
diarrhea, headache	CACNA1F	20	Database	——	——
diarrhea, headache	CACNA1G	0	Database	——	——
diarrhea, headache	GNRH1	14	Database	——	——
diarrhea, headache	CACNA1S	20	Database	——	——
diarrhea, headache	OXT	0	Database	NA	NA
diarrhea, nausea	POMC	0	Database	11	11, 7
diarrhea, nausea	PDE4A	0	Database	11	11, 7
diarrhea, nausea	PDE4B	0	Database	11	11, 7
diarrhea, nausea	PDE4C	0	Database	11	11, 7
diarrhea, nausea	PDE4D	0	Database	11	11, 7
diarrhea, nausea	CACNA1H	0	Database	11	11, 7, 6
diarrhea, nausea	ADCY1	0	Database	11	11, 7, 6
diarrhea, nausea	HTR2B	0	Database	11	11, 7, 6
diarrhea, nausea	HTR2A	0	Database	11	11, 7, 6
diarrhea, nausea	HTR3B	2	Database	11	11, 7, 6
diarrhea, nausea	HTR3C	0	Database	11	11, 7, 6
diarrhea, nausea	HTR1A	0	Database	11	11, 7, 6
diarrhea, nausea	CACNA1I	0	Database	——	7
diarrhea, nausea	CACNA1G	3	Database	——	7
diarrhea, nausea	ESR2	0	Database	——	7, 6
diarrhea, nausea	ESR1	0	Database	——	7, 6
diarrhea, nausea	IFNG	0	Database	——	7, 6
diarrhea, nausea	IFNA2	0	Database	——	7, 6
diarrhea, thrombocytopenia	ITGB3	0	Database	11	3
diarrhea, thrombocytopenia	PRKCE	0	20	11	3
diarrhea, thrombocytopenia	PF4	0	Database	11	3
diarrhea, thrombocytopenia	ITGA2B	0	Database	11	3
diarrhea, thrombocytopenia	IL3	0	Database	11	3
diarrhea, thrombocytopenia	MAPK1	0	0	11	9, 3
diarrhea, thrombocytopenia	CSF2	0	Database	11	——
diarrhea, thrombocytopenia	ALB	0	Database	NA	NA
diarrhea, thrombocytopenia	GP1BB	2	Database	NA	NA
diarrhea, thrombocytopenia	GATA1	16	Database	NA	NA
diarrhea, thrombocytopenia	GP9	20	Database	NA	NA
diarrhea, urticaria	HLA-DPB1	0	Database	11	12
diarrhea, urticaria	ICAM1	0	Database	11	12
diarrhea, urticaria	IL18	0	Database	11	3, 12
diarrhea, urticaria	TGFB1	0	Database	11	3, 12
diarrhea, urticaria	IL1B	0	Database	11	3, 12
diarrhea, urticaria	HLA-DRB1	0	Database	——	3, 12
diarrhea, urticaria	VCAM1	0	Database	——	3, 12
diarrhea, urticaria	ALB	0	Database	NA	NA
diarrhea, urticaria	HLA-DQB1	0	Database	NA	NA
diarrhea, vomiting	PDE4A	0	Database	11	11, 7
diarrhea, vomiting	PDE4B	0	Database	11	11, 7
diarrhea, vomiting	PDE4C	0	Database	11	11, 7
diarrhea, vomiting	PDE4D	0	Database	11	11, 7
diarrhea, vomiting	ADCY1	0	Database	11	11, 7, 6
diarrhea, vomiting	HTR3B	8	Database	11	11, 7, 6
diarrhea, vomiting	HTR3C	0	Database	11	11, 7, 6
diarrhea, vomiting	GNRH1	0	Database	——	7
diarrhea, vomiting	ESR2	0	Database	——	7, 6
diarrhea, vomiting	ESR1	0	Database	——	7, 6
diarrhea, vomiting	IFNG	0	Database	——	7, 6
diarrhea, vomiting	IFNA2	0	Database	——	7, 6
diarrhea, vomiting	TACR1	0	Database	NA	NA
dizziness, ache	PLCB1	0	0	6	12, 6
dizziness, ache	OPRK1	3	0	6	12, 6
dizziness, ache	HTR7	0	0	6	12, 6
dizziness, ache	PNOC	0	0	6	12, 6
dizziness, ache	ADM	0	3	6	12, 6
dizziness, ache	ADCY1	Database	0	6	12, 6
dizziness, ache	IL2	0	0	6	12, 6
dizziness, ache	HTR1A	Database	0	6	12, 6
dizziness, ache	TRH	3	0	——	12
dizziness, ache	POMC	0	0	——	12
dizziness, ache	CSF2	0	0	——	12
dizziness, ache	NTSR1	6	0	9, 6	12, 6
dizziness, ache	AKT1	0	0	9, 6	12, 6
dizziness, ache	TAC1	0	0	9, 6	12, 6
dizziness, ache	PROKR1	0	0	9, 6	12, 6
dizziness, ache	EDN1	9	0	9, 6	12, 6
dizziness, ache	DRD2	0	0	9, 6	12, 6
dizziness, ache	GCH1	2	0	NA	NA
dizziness, ache	ALB	20	0	NA	NA
dizziness, ache	CRH	0	0	NA	NA
dizziness, ache	SLC9A1	2	0	NA	NA
dizziness, ache	PENK	7	0	NA	NA
dizziness, ache	PDYN	6	0	NA	NA
dizziness, ache	OXT	0	7	NA	NA
dizziness, ache	HCRT	0	0	NA	NA
dizziness, ache	BDKRB1	0	0	NA	NA
dizziness, ache	BDKRB2	0	0	NA	NA
dizziness, ache	KNG1	20	0	NA	NA
dizziness, dyspnea	ADCY1	Database	0	6	6
dizziness, dyspnea	HTR6	3	5	6	6
dizziness, dyspnea	HTR7	6	0	6	6
dizziness, dyspnea	HTR2A	1	3	6	6
dizziness, dyspnea	HTR2C	8	20	6	6
dizziness, dyspnea	HTR1A	Database	1	6	6
dizziness, dyspnea	DRD2	20	2	9, 6	9, 10, 6
dizziness, dyspnea	DRD3	10	20	9, 6	9, 10, 6
dizziness, dyspnea	DRD1	3	10	9, 6	9, 10, 6
dizziness, hypotension	IL1B	0	Database	6	3, 6
dizziness, hypotension	IFNG	0	Database	6	3, 6
dizziness, hypotension	TH	0	Database	6	3, 6
dizziness, hypotension	NPPA	2	Database	6	3, 6
dizziness, hypotension	LTF	0	Database	6	3, 6
dizziness, hypotension	PNOC	0	Database	6	3, 6
dizziness, hypotension	ADCY1	Database	0	6	3, 6
dizziness, hypotension	INS	0	Database	6	3, 6
dizziness, hypotension	IL6	0	Database	6	3, 6
dizziness, hypotension	IL2	20	Database	6	3, 6
dizziness, hypotension	HTR1D	1	Database	6	3, 6
dizziness, hypotension	HTR1A	Database	0	6	3, 6
dizziness, hypotension	HTR1B	0	Database	6	3, 6
dizziness, hypotension	ACE	20	Database	——	——
dizziness, hypotension	SOD1	0	Database	——	——
dizziness, hypotension	POMC	19	Database	——	——
dizziness, hypotension	MAOB	20	Database	——	——
dizziness, hypotension	GRIA1	20	Database	9, 6	9, 3, 6
dizziness, hypotension	DDC	0	Database	9, 6	9, 3, 6
dizziness, hypotension	AGT	0	Database	9, 6	9, 3, 6
dizziness, hypotension	CNR1	20	Database	9, 6	9, 3, 6
dizziness, hypotension	CYP2D6	Database	16	9, 6	9, 3, 6
dizziness, hypotension	TAC1	0	Database	9, 6	9, 3, 6
dizziness, hypotension	GRIN2B	20	Database	9, 6	9, 3, 6
dizziness, hypotension	DRD1	0	Database	9, 6	9, 3, 6
dizziness, hypotension	EDN1	0	Database	9, 6	9, 3, 6
dizziness, hypotension	EDN3	0	Database	9, 6	9, 3, 6
dizziness, hypotension	EDN2	0	Database	9, 6	9, 3, 6
dizziness, hypotension	GCG	0	Database	9, 6	9, 3, 6
dizziness, hypotension	PLAU	0	Database	9, 6	9, 3, 6
dizziness, hypotension	PLAT	0	Database	9, 6	9, 3, 6
dizziness, hypotension	ADRA1B	0	Database	9, 6	9, 3, 6
dizziness, hypotension	DRD4	0	0	9, 6	9, 3, 6
dizziness, hypotension	DRD2	0	Database	9, 6	9, 3, 6
dizziness, hypotension	DRD3	0	0	9, 6	9, 3, 6
dizziness, hypotension	PRL	0	Database	9, 6	9, 3, 6
dizziness, hypotension	CPN1	0	Database	9, 6	9, 3, 6
dizziness, hypotension	ADORA1	0	Database	NA	NA
dizziness, hypotension	ALB	0	Database	NA	NA
dizziness, hypotension	CAT	2	Database	NA	NA
dizziness, hypotension	BCHE	Database	0	NA	NA
dizziness, hypotension	CRH	0	Database	NA	NA
dizziness, hypotension	ADORA2A	0	Database	NA	NA
dizziness, hypotension	ADRA2A	0	Database	NA	NA
dizziness, hypotension	PDYN	0	Database	NA	NA
dizziness, hypotension	OXT	0	Database	NA	NA
dizziness, hypotension	BDKRB2	20	Database	NA	NA
dizziness, hypotension	KNG1	0	Database	NA	NA
dizziness, hypotension	MAOA	0	Database	NA	NA
dizziness, hypotension	REN	0	Database	NA	NA
dizziness, itching	HTR1A	Database	0	6	6
dizziness, itching	ADCY1	Database	12	6	6
dizziness, mouth dry	HTR1A	Database	5	6	11, 6
dizziness, mouth dry	ADCY1	Database	3	6	11, 6
dizziness, nausea	CACNA1H	0	Database	6	11, 7, 6
dizziness, nausea	ADCY1	Database	Database	6	11, 7, 6
dizziness, nausea	HTR2B	0	Database	6	11, 7, 6
dizziness, nausea	HTR2A	5	Database	6	11, 7, 6
dizziness, nausea	HTR3B	0	Database	6	11, 7, 6
dizziness, nausea	HTR3C	4	Database	6	11, 7, 6
dizziness, nausea	HTR1A	Database	Database	6	11, 7, 6
dizziness, nausea	ESR1	0	Database	6	7, 6
dizziness, nausea	IFNG	0	Database	6	7, 6
dizziness, nausea	IFNA2	0	Database	6	7, 6
dizziness, nausea	CACNA1I	0	Database	——	7
dizziness, nausea	CACNA1G	18	Database	——	7
dizziness, nausea	POMC	20	Database	——	11, 7
dizziness, nausea	PDE4A	4	Database	——	11, 7
dizziness, nausea	PDE4B	6	Database	——	11, 7
dizziness, nausea	PDE4C	2	Database	——	11, 7
dizziness, nausea	PDE4D	0	Database	——	11, 7
dizziness, nausea	ESR2	0	Database	9, 6	7, 6
dizziness, oedema	ESR1	0	Database	6	7
dizziness, oedema	HTR1A	Database	6	6	11, 14, 7
dizziness, oedema	ADCY1	Database	0	6	11, 15, 14, 7
dizziness, oedema	ESR2	0	Database	9, 6	9, 15, 7
dizziness, paresthesias	HTR1D	20	11	6	6
dizziness, paresthesias	ADCY1	Database	0	6	6
dizziness, paresthesias	HTR1B	20	0	6	6
dizziness, paresthesias	HTR1A	Database	0	6	6
dizziness, tiredness	HTR1A	Database	0	6	5, 6
dizziness, tiredness	ADCY1	Database	0	6	5, 6
dizziness, urticaria	IL18	0	Database	6	3, 12
dizziness, urticaria	ADCY1	Database	0	6	3, 12
dizziness, urticaria	TGFB1	0	Database	6	3, 12
dizziness, urticaria	IL1B	0	Database	6	3, 12
dizziness, urticaria	HTR1A	Database	0	6	3, 12
dizziness, urticaria	VCAM1	0	Database	9	3, 12
dizziness, urticaria	HLA-DPB1	0	Database	——	12
dizziness, urticaria	ICAM1	0	Database	——	12
dizziness, urticaria	HLA-DRB1	0	Database	——	3, 12
dizziness, urticaria	ALB	0	Database	NA	NA
dizziness, urticaria	HLA-DQB1	2	Database	NA	NA
dyspnea, ache	HTR2A	19	0	6	12, 6
dyspnea, ache	PLCB1	0	20	6	12, 6
dyspnea, ache	OPRK1	0	10	6	12, 6
dyspnea, ache	HTR7	0	2	6	12, 6
dyspnea, ache	PNOC	0	2	6	12, 6
dyspnea, ache	ADM	0	20	6	12, 6
dyspnea, ache	IL2	20	0	6	12, 6
dyspnea, ache	HTR1D	2	0	6	12, 6
dyspnea, ache	HTR1A	2	0	6	12, 6
dyspnea, ache	TRH	18	0	——	12
dyspnea, ache	POMC	20	4	——	12
dyspnea, ache	CSF2	0	20	——	12
dyspnea, ache	NTSR1	20	0	9, 10, 6	12, 6
dyspnea, ache	PROKR1	20	0	9, 10, 6	12, 6
dyspnea, ache	EDN1	0	0	9, 10, 6	12, 6
dyspnea, ache	DRD2	0	20	9, 10, 6	12, 6
dyspnea, ache	AKT1	0	0	9, 6	12, 6
dyspnea, ache	TAC1	6	0	9, 6	12, 6
dyspnea, ache	ALB	0	0	NA	NA
dyspnea, ache	CRH	14	0	NA	NA
dyspnea, ache	SLC9A1	0	0	NA	NA
dyspnea, ache	PENK	0	0	NA	NA
dyspnea, ache	PDYN	0	5	NA	NA
dyspnea, ache	OXT	0	0	NA	NA
dyspnea, ache	HCRT	0	7	NA	NA
dyspnea, ache	BDKRB1	0	0	NA	NA
dyspnea, ache	BDKRB2	0	10	NA	NA
dyspnea, ache	KNG1	0	0	NA	NA
dyspnea, fever	GRIN2B	0	20	9, 10, 6	3
dyspnea, fever	GRIN2A	0	0	9, 10, 6	3
dyspnea, fever	CES1	5	7	NA	NA
dyspnea, fever	CES2	3	0	NA	NA
dyspnea, headache	CACNA1H	0	Database	6	5, 6
dyspnea, headache	HTR6	0	0	6	5, 6
dyspnea, headache	HTR7	0	0	6	5, 6
dyspnea, headache	HTR2A	2	0	6	5, 6
dyspnea, headache	HTR2C	0	0	6	5, 6
dyspnea, headache	HTR1A	0	Database	6	5, 6
dyspnea, headache	CACNA1I	0	Database	——	——
dyspnea, headache	CACNA1C	0	Database	——	——
dyspnea, headache	CACNA1D	7	Database	——	——
dyspnea, headache	CACNA1G	0	Database	——	——
dyspnea, headache	CACNA1F	0	Database	——	——
dyspnea, headache	GNRH1	3	Database	——	——
dyspnea, headache	CACNA1S	2	Database	——	——
dyspnea, headache	DRD1	0	0	9, 10, 6	5, 6
dyspnea, headache	DRD2	0	0	9, 10, 6	5, 6
dyspnea, headache	DRD4	0	3	9, 10, 6	5, 6
dyspnea, headache	DRD3	7	0	9, 10, 6	5, 6
dyspnea, headache	CHRM1	3	0	9, 10, 6	5, 6
dyspnea, headache	ADRA1D	0	0	9, 6	6
dyspnea, headache	OXT	0	Database	NA	NA
dyspnea, hypotension	IL1B	0	Database	6	3, 6
dyspnea, hypotension	IFNG	0	Database	6	3, 6
dyspnea, hypotension	TH	0	Database	6	3, 6
dyspnea, hypotension	LTF	0	Database	6	3, 6
dyspnea, hypotension	PNOC	0	Database	6	3, 6
dyspnea, hypotension	INS	0	Database	6	3, 6
dyspnea, hypotension	IL6	4	Database	6	3, 6
dyspnea, hypotension	IL2	0	Database	6	3, 6
dyspnea, hypotension	HTR1D	15	Database	6	3, 6
dyspnea, hypotension	HTR1B	3	Database	6	3, 6
dyspnea, hypotension	ACE	0	Database	——	——
dyspnea, hypotension	SOD1	0	Database	——	——
dyspnea, hypotension	POMC	0	Database	——	——
dyspnea, hypotension	MAOB	4	Database	——	——
dyspnea, hypotension	NPPA	0	Database	10, 6	3, 6
dyspnea, hypotension	GRIA1	0	Database	9, 10, 6	9, 3, 6
dyspnea, hypotension	AGT	0	Database	9, 10, 6	9, 3, 6
dyspnea, hypotension	CNR1	0	Database	9, 10, 6	9, 3, 6
dyspnea, hypotension	DRD1	0	Database	9, 10, 6	9, 3, 6
dyspnea, hypotension	EDN1	0	Database	9, 10, 6	9, 3, 6
dyspnea, hypotension	EDN3	0	Database	9, 10, 6	9, 3, 6
dyspnea, hypotension	EDN2	0	Database	9, 10, 6	9, 3, 6
dyspnea, hypotension	CHRM2	0	0	9, 10, 6	9, 3, 6
dyspnea, hypotension	PLAU	0	Database	9, 10, 6	9, 3, 6
dyspnea, hypotension	PLAT	0	Database	9, 10, 6	9, 3, 6
dyspnea, hypotension	GRIN2B	0	Database	9, 10, 6	9, 3, 6
dyspnea, hypotension	DRD2	2	Database	9, 10, 6	9, 3, 6
dyspnea, hypotension	DDC	0	Database	9, 6	9, 3, 6
dyspnea, hypotension	PRL	0	Database	9, 6	9, 3, 6
dyspnea, hypotension	GCG	0	Database	9, 6	9, 3, 6
dyspnea, hypotension	ADRA1B	0	Database	9, 6	9, 3, 6
dyspnea, hypotension	TAC1	0	Database	9, 6	9, 3, 6
dyspnea, hypotension	CPN1	20	Database	9, 6	9, 3, 6
dyspnea, hypotension	ADORA1	0	Database	NA	NA
dyspnea, hypotension	ALB	0	Database	NA	NA
dyspnea, hypotension	CAT	0	Database	NA	NA
dyspnea, hypotension	BCHE	0	0	NA	NA
dyspnea, hypotension	CRH	0	Database	NA	NA
dyspnea, hypotension	ADORA2A	0	Database	NA	NA
dyspnea, hypotension	ADRA2A	0	Database	NA	NA
dyspnea, hypotension	PDYN	0	Database	NA	NA
dyspnea, hypotension	OXT	0	Database	NA	NA
dyspnea, hypotension	BDKRB2	0	Database	NA	NA
dyspnea, hypotension	KNG1	5	Database	NA	NA
dyspnea, hypotension	MAOA	3	Database	NA	NA
dyspnea, hypotension	REN	0	Database	NA	NA
dyspnea, insomnia	HTR6	0	5	6	5, 6
dyspnea, insomnia	HTR7	0	20	6	5, 6
dyspnea, insomnia	HTR2A	0	2	6	5, 6
dyspnea, insomnia	HTR2C	0	20	6	5, 6
dyspnea, insomnia	HTR1A	0	9	6	5, 6
dyspnea, insomnia	DRD4	0	14	9, 10, 6	5, 6
dyspnea, insomnia	DRD2	0	19	9, 10, 6	5, 6
dyspnea, insomnia	DRD3	0	2	9, 10, 6	5, 6
dyspnea, insomnia	CHRM1	6	20	9, 10, 6	5, 6
dyspnea, insomnia	DRD1	0	0	9, 10, 6	5, 6
dyspnea, insomnia	ADRA1B	0	0	9, 6	6
dyspnea, insomnia	ADRA1D	0	10	9, 6	6
dyspnea, insomnia	ADRA2A	0	3	NA	NA
dyspnea, itching	GRM1	12	3	9, 10, 6	6
dyspnea, itching	GRM2	0	2	9, 10, 6	6
dyspnea, itching	GRM3	0	0	9, 10, 6	6
dyspnea, myalgia	HTR2A	0	0	6	13, 6
dyspnea, myalgia	HTR2C	0	10	6	13, 6
dyspnea, myalgia	HTR1A	0	5	6	13, 6
dyspnea, myalgia	DRD2	2	0	9, 10, 6	13, 6
dyspnea, myalgia	DRD3	0	20	9, 10, 6	13, 6
dyspnea, nausea	CACNA1H	0	Database	6	11, 7, 6
dyspnea, nausea	HTR2A	0	Database	6	11, 7, 6
dyspnea, nausea	HTR2C	0	0	6	11, 7, 6
dyspnea, nausea	HTR2B	0	Database	6	11, 7, 6
dyspnea, nausea	HTR7	2	0	6	11, 7, 6
dyspnea, nausea	ADCY1	0	Database	6	11, 7, 6
dyspnea, nausea	HTR3B	0	Database	6	11, 7, 6
dyspnea, nausea	HTR3C	3	Database	6	11, 7, 6
dyspnea, nausea	HTR1A	0	Database	6	11, 7, 6
dyspnea, nausea	IFNG	20	Database	6	7, 6
dyspnea, nausea	ESR1	0	Database	6	7, 6
dyspnea, nausea	IFNA2	0	Database	6	7, 6
dyspnea, nausea	CACNA1I	0	Database	——	7
dyspnea, nausea	CACNA1G	0	Database	——	7
dyspnea, nausea	POMC	0	Database	——	11, 7
dyspnea, nausea	PDE4A	0	Database	——	11, 7
dyspnea, nausea	PDE4B	2	Database	——	11, 7
dyspnea, nausea	PDE4C	2	Database	——	11, 7
dyspnea, nausea	PDE4D	20	Database	——	11, 7
dyspnea, nausea	DRD2	0	0	9, 10, 6	11, 7, 6
dyspnea, nausea	DRD3	0	20	9, 10, 6	11, 7, 6
dyspnea, nausea	ESR2	0	Database	9, 6	7, 6
dyspnea, paresthesias	GRIN2B	0	0	9, 10, 6	6
dyspnea, paresthesias	GRIN2A	20	0	9, 10, 6	6
dyspnea, paresthesias	CES1	0	0	NA	NA
dyspnea, paresthesias	CES2	3	0	NA	NA
dyspnea, somnolence	HTR6	0	3	6	5, 6
dyspnea, somnolence	HTR7	20	4	6	5, 6
dyspnea, somnolence	HTR2A	14	0	6	5, 6
dyspnea, somnolence	HTR2C	5	5	6	5, 6
dyspnea, somnolence	HTR1A	3	0	6	5, 6
dyspnea, somnolence	DRD4	0	0	9, 10, 6	5, 6
dyspnea, somnolence	DRD2	0	0	9, 10, 6	5, 6
dyspnea, somnolence	DRD3	20	14	9, 10, 6	5, 6
dyspnea, somnolence	CHRM1	0	5	9, 10, 6	5, 6
dyspnea, somnolence	DRD1	0	20	9, 10, 6	5, 6
dyspnea, somnolence	ADRA1D	0	0	9, 6	6
dyspnea, tachycardia	HTR4	3	Database	6	6
dyspnea, tachycardia	HTR2A	0	0	6	6
dyspnea, tachycardia	TRH	0	Database	——	——
dyspnea, tachycardia	LEP	0	Database	——	——
dyspnea, tachycardia	GNRH1	0	Database	——	——
dyspnea, tachycardia	CHRM5	0	0	9, 10, 6	9, 6
dyspnea, tachycardia	CHRM4	0	2	9, 10, 6	9, 6
dyspnea, tachycardia	DRD2	0	Database	9, 10, 6	9, 6
dyspnea, tachycardia	CHRM2	0	2	9, 10, 6	9, 6
dyspnea, tachycardia	GCG	0	Database	9, 6	9, 6
dyspnea, tachycardia	LHB	0	Database	NA	NA
dyspnea, tachycardia	GNAS	2	Database	NA	NA
dyspnea, tachycardia	GAL	0	Database	NA	NA
dyspnea, tachycardia	SCT	0	Database	NA	NA
dyspnea, tiredness	HTR2A	18	0	6	5, 6
dyspnea, tiredness	HTR2C	0	0	6	5, 6
dyspnea, tiredness	HTR1A	0	0	6	5, 6
dyspnea, tiredness	CHRM5	0	0	9, 10, 6	5, 6
dyspnea, tiredness	CHRM4	20	20	9, 10, 6	5, 6
dyspnea, tiredness	DRD2	0	0	9, 10, 6	5, 6
dyspnea, tiredness	DRD3	0	0	9, 10, 6	5, 6
dyspnea, vomiting	HTR2A	0	20	6	11, 7, 6
dyspnea, vomiting	HTR2C	0	0	6	11, 7, 6
dyspnea, vomiting	HTR6	0	0	6	11, 7, 6
dyspnea, vomiting	HTR7	0	0	6	11, 7, 6
dyspnea, vomiting	ADCY1	0	Database	6	11, 7, 6
dyspnea, vomiting	HTR3B	0	Database	6	11, 7, 6
dyspnea, vomiting	HTR3C	0	Database	6	11, 7, 6
dyspnea, vomiting	HTR1A	0	0	6	11, 7, 6
dyspnea, vomiting	IFNG	0	Database	6	7, 6
dyspnea, vomiting	ESR1	0	Database	6	7, 6
dyspnea, vomiting	IFNA2	0	Database	6	7, 6
dyspnea, vomiting	GNRH1	0	Database	——	7
dyspnea, vomiting	PDE4A	0	Database	——	11, 7
dyspnea, vomiting	PDE4B	0	Database	——	11, 7
dyspnea, vomiting	PDE4C	0	Database	——	11, 7
dyspnea, vomiting	PDE4D	0	Database	——	11, 7
dyspnea, vomiting	CHRM1	16	0	9, 10, 6	11, 7, 6
dyspnea, vomiting	ADRA1A	0	0	9, 10, 6	11, 7, 6
dyspnea, vomiting	DRD4	0	0	9, 10, 6	11, 7, 6
dyspnea, vomiting	DRD2	0	0	9, 10, 6	11, 7, 6
dyspnea, vomiting	DRD3	0	0	9, 10, 6	11, 7, 6
dyspnea, vomiting	CYP3A7	0	20	9, 6	11, 7, 6
dyspnea, vomiting	CYP3A5	0	20	9, 6	11, 7, 6
dyspnea, vomiting	ESR2	0	Database	9, 6	7, 6
dyspnea, vomiting	ADRA1D	0	0	9, 6	7, 6
dyspnea, vomiting	ADRA2C	2	0	NA	NA
dyspnea, vomiting	HRH1	0	5	NA	NA
dyspnea, vomiting	TACR1	0	Database	NA	NA
dyspnea, vomiting	ADRB1	0	0	NA	NA
fever, ache	NTSR1	0	0	3	12, 6
fever, ache	AKT1	0	20	3	12, 6
fever, ache	TAC1	0	20	3	12, 6
fever, ache	PROKR1	0	11	3	12, 6
fever, ache	EDN1	0	0	3	12, 6
fever, ache	PLCB1	0	0	3	12, 6
fever, ache	OPRK1	0	20	3	12, 6
fever, ache	HTR7	0	20	3	12, 6
fever, ache	PNOC	0	0	3	12, 6
fever, ache	ADM	0	0	3	12, 6
fever, ache	DRD2	0	0	3	12, 6
fever, ache	IL2	0	0	3	12, 6
fever, ache	HTR1A	0	3	3	12, 6
fever, ache	TRH	0	20	——	12
fever, ache	POMC	0	0	——	12
fever, ache	CSF2	0	0	——	12
fever, ache	ALB	20	11	NA	NA
fever, ache	CRH	9	0	NA	NA
fever, ache	SLC9A1	12	0	NA	NA
fever, ache	PENK	0	0	NA	NA
fever, ache	PDYN	0	20	NA	NA
fever, ache	OXT	0	0	NA	NA
fever, ache	HCRT	0	0	NA	NA
fever, ache	BDKRB1	0	6	NA	NA
fever, ache	BDKRB2	0	0	NA	NA
fever, ache	KNG1	13	0	NA	NA
fever, headache	CACNA1H	0	Database	3	5, 6
fever, headache	CACNA1I	0	Database	3	——
fever, headache	CACNA1C	0	Database	3	——
fever, headache	CACNA1D	0	Database	3	——
fever, headache	CACNA1F	3	Database	3	——
fever, headache	CACNA1G	0	Database	3	——
fever, headache	GNRH1	2	Database	3	——
fever, headache	CACNA1S	0	Database	3	——
fever, headache	OXT	0	Database	NA	NA
fever, nausea	CACNA1I	0	Database	3	7
fever, nausea	CACNA1G	0	Database	3	7
fever, nausea	CACNA1H	0	Database	3	11, 7, 6
fever, nausea	ADCY1	0	Database	3	11, 7, 6
fever, nausea	HTR2B	2	Database	3	11, 7, 6
fever, nausea	HTR2A	0	Database	3	11, 7, 6
fever, nausea	HTR3B	0	Database	3	11, 7, 6
fever, nausea	HTR3C	20	Database	3	11, 7, 6
fever, nausea	HTR1A	20	Database	3	11, 7, 6
fever, nausea	ESR2	0	Database	3	7, 6
fever, nausea	ESR1	0	Database	3	7, 6
fever, nausea	IFNG	0	Database	3	7, 6
fever, nausea	IFNA2	0	Database	3	7, 6
fever, nausea	POMC	0	Database	——	11, 7
fever, nausea	PDE4A	5	Database	——	11, 7
fever, nausea	PDE4B	0	Database	——	11, 7
fever, nausea	PDE4C	0	Database	——	11, 7
fever, nausea	PDE4D	2	Database	——	11, 7
fever, urticaria	IL18	0	Database	3	3, 12
fever, urticaria	TGFB1	2	Database	3	3, 12
fever, urticaria	HLA-DRB1	0	Database	3	3, 12
fever, urticaria	VCAM1	0	Database	3	3, 12
fever, urticaria	IL1B	0	Database	3	3, 12
fever, urticaria	HLA-DPB1	0	Database	——	12
fever, urticaria	ICAM1	3	Database	——	12
fever, urticaria	ALB	0	Database	NA	NA
fever, urticaria	HLA-DQB1	0	Database	NA	NA
fever, vomiting	GNRH1	14	Database	3	7
fever, vomiting	ADCY1	0	Database	3	11, 7, 6
fever, vomiting	HTR3B	0	Database	3	11, 7, 6
fever, vomiting	HTR3C	0	Database	3	11, 7, 6
fever, vomiting	ESR2	4	Database	3	7, 6
fever, vomiting	ESR1	0	Database	3	7, 6
fever, vomiting	IFNG	0	Database	3	7, 6
fever, vomiting	IFNA2	0	Database	3	7, 6
fever, vomiting	PDE4A	20	Database	——	11, 7
fever, vomiting	PDE4B	20	Database	——	11, 7
fever, vomiting	PDE4C	0	Database	——	11, 7
fever, vomiting	PDE4D	0	Database	——	11, 7
fever, vomiting	TACR1	0	Database	NA	NA
fibrillation atrial, fibrillation	F2	0	19	6	12
fibrillation atrial, fibrillation	ADCY2	0	6	6	12
fibrillation atrial, fibrillation	PDE6B	16	0	6	12
fibrillation atrial, fibrillation	PDE4A	20	0	——	12
fibrillation atrial, fibrillation	PDE4B	20	0	——	12
fibrillation atrial, fibrillation	PDE4C	0	0	——	12
fibrillation atrial, fibrillation	HPD	15	0	——	12
fibrillation atrial, fibrillation	PDE6A	0	0	9, 6	12
fibrillation atrial, fibrillation	ADORA2A	0	0	NA	NA
fibrillation atrial, fibrillation	ADORA1	0	0	NA	NA
fibrillation atrial, fibrillation	ADORA3	0	13	NA	NA
fibrillation atrial, fibrillation	PDE3A	19	0	NA	NA
fibrillation atrial, fibrillation	ADORA2B	12	5	NA	NA
fibrillation atrial, fibrillation	PDE2A	0	0	NA	NA
fibrillation atrial, fibrillation	PDE6C	20	0	NA	NA
fibrillation atrial, fibrillation	PDE5A	20	0	NA	NA
gastrointestinal disorders, mediastinal disorders	CBS	0	0	11	13
gastrointestinal disorders, mediastinal disorders	CTH	0	5	11	——
gastrointestinal disorders, mediastinal disorders	GOT1	0	10	——	13
gastrointestinal disorders, mediastinal disorders	CDO1	20	20	——	——
gastrointestinal disorders, mediastinal disorders	GSS	20	3	NA	NA
gastrointestinal disorders, mediastinal disorders	GCLM	5	0	NA	NA
gastrointestinal disorders, mediastinal disorders	CSAD	0	0	NA	NA
gastrointestinal disorders, mediastinal disorders	GCLC	7	0	NA	NA
gastrointestinal disorders, thoracic complications	CBS	0	0	11	6
gastrointestinal disorders, thoracic complications	CTH	0	0	11	——
gastrointestinal disorders, thoracic complications	GOT1	0	0	——	6
gastrointestinal disorders, thoracic complications	CDO1	0	0	——	10
gastrointestinal disorders, thoracic complications	GSS	0	4	NA	NA
gastrointestinal disorders, thoracic complications	GCLM	0	0	NA	NA
gastrointestinal disorders, thoracic complications	CSAD	0	0	NA	NA
gastrointestinal disorders, thoracic complications	GCLC	0	0	NA	NA
headache, ache	TRH	2	0	5	12
headache, ache	POMC	0	5	5	12
headache, ache	CSF2	0	20	5	12
headache, ache	AKT1	0	2	6	12, 6
headache, ache	CACNA1I	Database	0	——	12
headache, ache	CACNA1C	Database	0	——	12
headache, ache	CACNA1D	Database	0	——	12
headache, ache	CACNA1F	Database	0	——	12
headache, ache	CACNA1G	Database	20	——	12
headache, ache	CACNA1S	Database	0	——	12
headache, ache	GNRH1	Database	0	——	12
headache, ache	NTSR1	0	0	5, 6	12, 6
headache, ache	CACNA1H	Database	0	5, 6	12, 6
headache, ache	ADM	0	4	5, 6	12, 6
headache, ache	TAC1	0	0	5, 6	12, 6
headache, ache	PROKR1	0	0	5, 6	12, 6
headache, ache	EDN1	0	20	5, 6	12, 6
headache, ache	PLCB1	0	0	5, 6	12, 6
headache, ache	OPRK1	0	20	5, 6	12, 6
headache, ache	HTR7	20	10	5, 6	12, 6
headache, ache	PNOC	0	4	5, 6	12, 6
headache, ache	CACNA2D1	20	7	5, 6	12, 6
headache, ache	DRD2	0	0	5, 6	12, 6
headache, ache	IL2	0	0	5, 6	12, 6
headache, ache	HTR1A	Database	0	5, 6	12, 6
headache, ache	ALB	0	9	NA	NA
headache, ache	CRH	0	0	NA	NA
headache, ache	SLC9A1	0	0	NA	NA
headache, ache	PENK	0	0	NA	NA
headache, ache	PDYN	0	0	NA	NA
headache, ache	OXT	Database	3	NA	NA
headache, ache	HCRT	0	2	NA	NA
headache, ache	BDKRB1	0	20	NA	NA
headache, ache	BDKRB2	0	5	NA	NA
headache, ache	KNG1	0	0	NA	NA
headache, itching	CACNA1I	Database	2	——	——
headache, itching	CACNA1C	Database	0	——	——
headache, itching	CACNA1D	Database	0	——	——
headache, itching	CACNA1F	Database	2	——	——
headache, itching	CACNA1G	Database	0	——	——
headache, itching	GNRH1	Database	11	——	——
headache, itching	CACNA1S	Database	0	——	——
headache, itching	CACNA1H	Database	6	5, 6	6
headache, itching	OXT	Database	0	NA	NA
headache, nausea	POMC	0	Database	5	11, 7
headache, nausea	PDE4A	20	Database	5	11, 7
headache, nausea	PDE4B	11	Database	5	11, 7
headache, nausea	PDE4C	0	Database	5	11, 7
headache, nausea	PDE4D	20	Database	5	11, 7
headache, nausea	ESR2	0	Database	6	7, 6
headache, nausea	ESR1	0	Database	6	7, 6
headache, nausea	CACNA1I	Database	Database	——	7
headache, nausea	CACNA1C	Database	0	——	7
headache, nausea	CACNA1D	Database	20	——	7
headache, nausea	CACNA1F	Database	11	——	7
headache, nausea	CACNA1G	Database	Database	——	7
headache, nausea	CACNA1S	Database	0	——	7
headache, nausea	GNRH1	Database	0	——	7
headache, nausea	CACNA1H	Database	Database	5, 6	11, 7, 6
headache, nausea	HTR2A	20	Database	5, 6	11, 7, 6
headache, nausea	HTR2B	0	Database	5, 6	11, 7, 6
headache, nausea	ADCY1	0	Database	5, 6	11, 7, 6
headache, nausea	HTR3B	20	Database	5, 6	11, 7, 6
headache, nausea	HTR3C	17	Database	5, 6	11, 7, 6
headache, nausea	HTR1A	Database	Database	5, 6	11, 7, 6
headache, nausea	IFNG	0	Database	5, 6	7, 6
headache, nausea	IFNA2	Database	Database	5, 6	7, 6
headache, nausea	OXT	Database	20	NA	NA
headache, paresthesias	CACNA1I	Database	0	——	——
headache, paresthesias	CACNA1C	Database	0	——	——
headache, paresthesias	CACNA1D	Database	0	——	——
headache, paresthesias	CACNA1F	Database	0	——	——
headache, paresthesias	CACNA1G	Database	0	——	——
headache, paresthesias	GNRH1	Database	0	——	——
headache, paresthesias	CACNA1S	Database	0	——	——
headache, paresthesias	CACNA1H	Database	2	5, 6	6
headache, paresthesias	OXT	Database	20	NA	NA
headache, urticaria	ICAM1	0	Database	5	12
headache, urticaria	HLA-DPB1	0	Database	5	12
headache, urticaria	MMP9	20	0	5	12
headache, urticaria	VCAM1	0	Database	5	3, 12
headache, urticaria	CACNA1I	Database	20	——	3, 12
headache, urticaria	CACNA1C	Database	20	——	3, 12
headache, urticaria	CACNA1D	Database	0	——	3, 12
headache, urticaria	CACNA1F	Database	0	——	3, 12
headache, urticaria	CACNA1G	Database	0	——	3, 12
headache, urticaria	CACNA1S	Database	0	——	3, 12
headache, urticaria	HLA-DRB1	0	Database	——	3, 12
headache, urticaria	GNRH1	Database	0	——	3, 12
headache, urticaria	TGFB1	0	Database	5, 6	3, 12
headache, urticaria	ABP1	Database	2	5, 6	3, 12
headache, urticaria	IL1B	11	Database	5, 6	3, 12
headache, urticaria	CACNA1H	Database	0	5, 6	3, 12
headache, urticaria	PRKCB	18	0	5, 6	3, 12
headache, urticaria	CHUK	6	2	5, 6	3, 12
headache, urticaria	TNF	0	Database	5, 6	3, 12
headache, urticaria	IL18	0	Database	5, 6	3, 12
headache, urticaria	ADCY1	0	0	5, 6	3, 12
headache, urticaria	GSTM1	0	Database	5, 6	3, 12
headache, urticaria	IL6	Database	0	5, 6	3, 12
headache, urticaria	GSTP1	20	0	5, 6	3, 12
headache, urticaria	HTR1A	Database	0	5, 6	3, 12
headache, urticaria	HLA-DQB1	0	Database	NA	NA
headache, urticaria	HNMT	0	Database	NA	NA
headache, urticaria	OXT	Database	0	NA	NA
headache, urticaria	ALB	0	Database	NA	NA
hypotension, tachycardia	GNRH1	20	Database	3	——
hypotension, tachycardia	ACE	Database	19	——	——
hypotension, tachycardia	TRH	0	Database	——	——
hypotension, tachycardia	SOD1	Database	0	——	——
hypotension, tachycardia	POMC	Database	0	——	——
hypotension, tachycardia	LEP	0	Database	——	——
hypotension, tachycardia	MAOB	Database	Database	——	——
hypotension, tachycardia	IL1B	Database	0	3, 6	6
hypotension, tachycardia	IFNG	Database	0	3, 6	6
hypotension, tachycardia	TH	Database	0	3, 6	6
hypotension, tachycardia	NPPA	Database	0	3, 6	6
hypotension, tachycardia	HTR4	20	Database	3, 6	6
hypotension, tachycardia	LTF	Database	0	3, 6	6
hypotension, tachycardia	PNOC	Database	0	3, 6	6
hypotension, tachycardia	IL6	Database	20	3, 6	6
hypotension, tachycardia	IL2	Database	0	3, 6	6
hypotension, tachycardia	HTR1D	Database	0	3, 6	6
hypotension, tachycardia	HTR1B	Database	10	3, 6	6
hypotension, tachycardia	GRIA1	Database	0	9, 3, 6	9, 6
hypotension, tachycardia	DDC	Database	0	9, 3, 6	9, 6
hypotension, tachycardia	AGT	Database	0	9, 3, 6	9, 6
hypotension, tachycardia	CNR1	Database	0	9, 3, 6	9, 6
hypotension, tachycardia	TAC1	Database	0	9, 3, 6	9, 6
hypotension, tachycardia	GRIN2B	Database	0	9, 3, 6	9, 6
hypotension, tachycardia	EDN1	Database	0	9, 3, 6	9, 6
hypotension, tachycardia	EDN3	Database	0	9, 3, 6	9, 6
hypotension, tachycardia	EDN2	Database	0	9, 3, 6	9, 6
hypotension, tachycardia	GCG	Database	Database	9, 3, 6	9, 6
hypotension, tachycardia	PLAU	Database	0	9, 3, 6	9, 6
hypotension, tachycardia	PLAT	Database	0	9, 3, 6	9, 6
hypotension, tachycardia	ADRA1A	0	Database	9, 3, 6	9, 6
hypotension, tachycardia	ADRA1B	Database	20	9, 3, 6	9, 6
hypotension, tachycardia	ADRA1D	0	0	9, 3, 6	9, 6
hypotension, tachycardia	DRD2	Database	Database	9, 3, 6	9, 6
hypotension, tachycardia	DRD1	Database	5	9, 3, 6	9, 6
hypotension, tachycardia	PRL	Database	5	9, 3, 6	9, 6
hypotension, tachycardia	CPN1	Database	0	9, 3, 6	9, 6
hypotension, tachycardia	ADORA1	Database	0	NA	NA
hypotension, tachycardia	ALB	Database	0	NA	NA
hypotension, tachycardia	CAT	Database	0	NA	NA
hypotension, tachycardia	REN	Database	0	NA	NA
hypotension, tachycardia	CRH	Database	0	NA	NA
hypotension, tachycardia	LHB	0	Database	NA	NA
hypotension, tachycardia	ADORA2A	Database	0	NA	NA
hypotension, tachycardia	ADRA2A	Database	0	NA	NA
hypotension, tachycardia	GAL	0	Database	NA	NA
hypotension, tachycardia	SCT	0	Database	NA	NA
hypotension, tachycardia	PDYN	Database	0	NA	NA
hypotension, tachycardia	OXT	Database	0	NA	NA
hypotension, tachycardia	UCN	Database	0	NA	NA
hypotension, tachycardia	BDKRB2	Database	0	NA	NA
hypotension, tachycardia	GNAS	20	Database	NA	NA
hypotension, tachycardia	KNG1	Database	0	NA	NA
hypotension, tachycardia	MAOA	Database	Database	NA	NA
hypotension, vomiting	GNRH1	0	Database	3	7
hypotension, vomiting	PTGS2	0	Database	3	11, 7
hypotension, vomiting	PTGS1	0	Database	3	11, 7
hypotension, vomiting	ACE	Database	0	——	11, 7
hypotension, vomiting	PDE4A	16	Database	——	11, 7
hypotension, vomiting	SOD1	Database	0	——	11, 7
hypotension, vomiting	POMC	Database	12	——	11, 7
hypotension, vomiting	MAOB	Database	20	——	11, 7
hypotension, vomiting	PDE4B	0	Database	——	11, 7
hypotension, vomiting	PDE4C	8	Database	——	11, 7
hypotension, vomiting	PDE4D	0	Database	——	11, 7
hypotension, vomiting	IL1B	Database	0	3, 6	11, 7, 6
hypotension, vomiting	TH	Database	0	3, 6	11, 7, 6
hypotension, vomiting	IL2	Database	5	3, 6	11, 7, 6
hypotension, vomiting	NPPA	Database	4	3, 6	11, 7, 6
hypotension, vomiting	LTF	Database	2	3, 6	11, 7, 6
hypotension, vomiting	PNOC	Database	6	3, 6	11, 7, 6
hypotension, vomiting	ADCY1	0	Database	3, 6	11, 7, 6
hypotension, vomiting	INS	Database	20	3, 6	11, 7, 6
hypotension, vomiting	IL6	Database	2	3, 6	11, 7, 6
hypotension, vomiting	HTR3B	0	Database	3, 6	11, 7, 6
hypotension, vomiting	HTR3C	0	Database	3, 6	11, 7, 6
hypotension, vomiting	HTR1D	Database	3	3, 6	11, 7, 6
hypotension, vomiting	HTR1B	Database	0	3, 6	11, 7, 6
hypotension, vomiting	IFNG	Database	Database	3, 6	7, 6
hypotension, vomiting	ESR1	0	Database	3, 6	7, 6
hypotension, vomiting	IFNA2	0	Database	3, 6	7, 6
hypotension, vomiting	GRIA1	Database	5	9, 3, 6	11, 7, 6
hypotension, vomiting	DDC	Database	0	9, 3, 6	11, 7, 6
hypotension, vomiting	AGT	Database	20	9, 3, 6	11, 7, 6
hypotension, vomiting	CNR1	Database	0	9, 3, 6	11, 7, 6
hypotension, vomiting	TAC1	Database	0	9, 3, 6	11, 7, 6
hypotension, vomiting	GRIN2B	Database	20	9, 3, 6	11, 7, 6
hypotension, vomiting	DRD1	Database	0	9, 3, 6	11, 7, 6
hypotension, vomiting	EDN1	Database	14	9, 3, 6	11, 7, 6
hypotension, vomiting	EDN3	Database	20	9, 3, 6	11, 7, 6
hypotension, vomiting	EDN2	Database	3	9, 3, 6	11, 7, 6
hypotension, vomiting	GCG	Database	5	9, 3, 6	11, 7, 6
hypotension, vomiting	PLAU	Database	0	9, 3, 6	11, 7, 6
hypotension, vomiting	PLAT	Database	14	9, 3, 6	11, 7, 6
hypotension, vomiting	CPN1	Database	0	9, 3, 6	11, 7, 6
hypotension, vomiting	DRD2	Database	3	9, 3, 6	11, 7, 6
hypotension, vomiting	CYP2E1	0	5	9, 3, 6	11, 7, 6
hypotension, vomiting	PRL	Database	15	9, 3, 6	11, 7, 6
hypotension, vomiting	ADRA1B	Database	0	9, 3, 6	7, 6
hypotension, vomiting	ESR2	0	Database	9, 3, 6	7, 6
hypotension, vomiting	ADORA1	Database	13	NA	NA
hypotension, vomiting	ALB	Database	0	NA	NA
hypotension, vomiting	CAT	Database	0	NA	NA
hypotension, vomiting	BCHE	0	Database	NA	NA
hypotension, vomiting	CRH	Database	2	NA	NA
hypotension, vomiting	ADORA2A	Database	0	NA	NA
hypotension, vomiting	ADRA2A	Database	0	NA	NA
hypotension, vomiting	PDYN	Database	0	NA	NA
hypotension, vomiting	OXT	Database	20	NA	NA
hypotension, vomiting	BDKRB2	Database	20	NA	NA
hypotension, vomiting	TACR1	0	Database	NA	NA
hypotension, vomiting	KNG1	Database	20	NA	NA
hypotension, vomiting	MAOA	Database	0	NA	NA
hypotension, vomiting	REN	Database	0	NA	NA
indigestion, dyspnea	HTR6	0	0	11	6
indigestion, dyspnea	HTR7	0	0	11	6
indigestion, dyspnea	HTR2A	0	0	11	6
indigestion, dyspnea	HTR2C	0	4	11	6
indigestion, dyspnea	HTR1A	0	0	11	6
indigestion, dyspnea	DRD2	0	2	11	9, 10, 6
indigestion, dyspnea	DRD3	0	0	11	9, 10, 6
indigestion, dyspnea	CHRM1	0	0	11	9, 10, 6
indigestion, dyspnea	DRD1	0	0	11	9, 10, 6
indigestion, dyspnea	ADRA1D	0	0	——	9, 6
indigestion, flatulence	CYP2C8	0	15	11	11
indigestion, flatulence	PTGS1	0	0	11	11
indigestion, flatulence	PTGS2	0	0	11	11
indigestion, mouth dry	HTR1A	20	3	11	11, 6
indigestion, mouth dry	SLC6A3	0	20	11	11, 9, 6
indigestion, mouth dry	DRD4	0	0	11	11, 9, 6
indigestion, mouth dry	DRD2	0	9	11	11, 9, 6
indigestion, mouth dry	ADRA2A	0	0	NA	NA
indigestion, mouth dry	ADRA2C	0	15	NA	NA
indigestion, myalgia	CYP3A7	14	0	11	13, 6
indigestion, myalgia	CYP3A5	0	0	11	13, 6
indigestion, oedema	ESR1	0	Database	——	7
indigestion, oedema	ESR2	0	Database	——	9, 15, 7
indigestion, rhinitis	IL4	0	Database	11	——
indigestion, rhinitis	IL13	0	Database	11	——
indigestion, somnolence	HTR6	20	0	11	5, 6
indigestion, somnolence	CYP2D6	0	0	11	5, 6
indigestion, somnolence	DRD4	20	0	11	5, 6
indigestion, somnolence	DRD2	9	20	11	5, 6
indigestion, somnolence	DRD3	0	0	11	5, 6
indigestion, somnolence	HTR7	0	0	11	5, 6
indigestion, somnolence	HTR2A	0	13	11	5, 6
indigestion, somnolence	CYP2A6	0	2	11	5, 6
indigestion, somnolence	HTR2C	0	0	11	5, 6
indigestion, somnolence	HTR2B	0	6	11	5, 6
indigestion, somnolence	CYP2C19	16	0	11	5, 6
indigestion, somnolence	CYP3A4	0	19	11	5, 6
indigestion, somnolence	DRD1	0	0	11	5, 6
indigestion, somnolence	HTR1A	0	0	11	5, 6
indigestion, somnolence	ADRA1D	13	18	——	6
indigestion, somnolence	ADRA2C	0	0	NA	NA
indigestion, somnolence	ADRA2A	0	5	NA	NA
indigestion, vertigo	SCN1B	0	Database	11	9, 5, 6
indigestion, vertigo	SCN2B	0	Database	NA	NA
indigestion, vertigo	SCN3B	20	Database	NA	NA
insomnia, somnolence	ADRA2A	0	5	NA	NA
insomnia, somnolence	ADRA2C	0	0	NA	NA
itching, urticaria	GOT1	0	3	6	12
itching, urticaria	TGFB1	0	Database	6	3, 12
itching, urticaria	IL1B	0	Database	6	3, 12
itching, urticaria	CHRNB2	0	0	6	3, 12
itching, urticaria	CHRNA7	0	0	6	3, 12
itching, urticaria	CHRNA2	0	3	6	3, 12
itching, urticaria	CHRNA3	0	4	6	3, 12
itching, urticaria	IL18	0	Database	6	3, 12
itching, urticaria	GSTM1	0	Database	6	3, 12
itching, urticaria	CBS	0	20	6	3, 12
itching, urticaria	ICAM1	0	Database	——	12
itching, urticaria	HLA-DPB1	0	Database	——	12
itching, urticaria	CDO1	0	0	——	3, 12
itching, urticaria	CTH	0	20	——	3, 12
itching, urticaria	HLA-DRB1	0	Database	——	3, 12
itching, urticaria	VCAM1	4	Database	——	3, 12
itching, urticaria	GSS	0	12	NA	NA
itching, urticaria	GCLM	20	0	NA	NA
itching, urticaria	GCLC	0	20	NA	NA
itching, urticaria	HLA-DQB1	4	Database	NA	NA
itching, urticaria	ALB	0	Database	NA	NA
itching, urticaria	CSAD	0	2	NA	NA
leukopenia, thrombocytopenia	TERT	0	0	NA	NA
leukopenia, thrombocytopenia	IMPDH1	0	0	NA	NA
leukopenia, thrombocytopenia	TOP1	0	2	NA	NA
leukopenia, thrombocytopenia	IMPDH2	14	0	NA	NA
mediastinal disorders, nervous system disorders	TUBA1A	0	9	13	6
mediastinal disorders, nervous system disorders	TUBB1	12	15	13	6
mediastinal disorders, nervous system disorders	TUBBP1	0	0	NA	NA
mediastinal disorders, thoracic complications	CBS	0	0	13	6
mediastinal disorders, thoracic complications	GOT1	0	2	13	6
mediastinal disorders, thoracic complications	CDO1	0	0	——	10
mediastinal disorders, thoracic complications	CTH	0	15	——	——
mediastinal disorders, thoracic complications	GSS	0	0	NA	NA
mediastinal disorders, thoracic complications	GCLM	0	0	NA	NA
mediastinal disorders, thoracic complications	CSAD	0	0	NA	NA
mediastinal disorders, thoracic complications	GCLC	0	11	NA	NA
mediastinal disorders, vascular disorders	GOT1	0	0	13	12
mediastinal disorders, vascular disorders	CBS	8	0	13	3, 12
mediastinal disorders, vascular disorders	CDO1	0	6	——	3, 12
mediastinal disorders, vascular disorders	CTH	18	19	——	3, 12
mediastinal disorders, vascular disorders	GSS	0	5	NA	NA
mediastinal disorders, vascular disorders	GCLM	0	0	NA	NA
mediastinal disorders, vascular disorders	CSAD	0	2	NA	NA
mediastinal disorders, vascular disorders	GCLC	0	13	NA	NA
mouth dry, somnolence	HTR2A	0	0	11, 6	5, 6
mouth dry, somnolence	HTR1A	0	0	11, 6	5, 6
mouth dry, somnolence	DRD4	20	20	11, 9, 6	5, 6
mouth dry, somnolence	DRD2	3	0	11, 9, 6	5, 6
mouth dry, somnolence	DRD3	0	0	11, 9, 6	5, 6
mouth dry, somnolence	CHRM1	0	0	11, 9, 6	5, 6
mouth dry, somnolence	ADRA2C	0	0	NA	NA
mouth dry, somnolence	ADRA2A	0	0	NA	NA
nausea, paresthesias	CACNA1I	Database	0	7	——
nausea, paresthesias	CACNA1G	Database	0	7	——
nausea, paresthesias	POMC	Database	0	11, 7	——
nausea, paresthesias	PDE4A	Database	0	11, 7	——
nausea, paresthesias	PDE4B	Database	0	11, 7	——
nausea, paresthesias	PDE4C	Database	0	11, 7	——
nausea, paresthesias	PDE4D	Database	0	11, 7	——
nausea, paresthesias	CACNA1H	Database	0	11, 7, 6	6
nausea, paresthesias	ADCY1	Database	0	11, 7, 6	6
nausea, paresthesias	HTR2B	Database	5	11, 7, 6	6
nausea, paresthesias	HTR2A	Database	0	11, 7, 6	6
nausea, paresthesias	HTR3B	Database	0	11, 7, 6	6
nausea, paresthesias	HTR3C	Database	20	11, 7, 6	6
nausea, paresthesias	HTR1D	20	0	11, 7, 6	6
nausea, paresthesias	HTR1A	Database	0	11, 7, 6	6
nausea, paresthesias	HTR1B	0	0	11, 7, 6	6
nausea, paresthesias	ESR2	Database	0	7, 6	6
nausea, paresthesias	ESR1	Database	0	7, 6	6
nausea, paresthesias	IFNG	Database	2	7, 6	6
nausea, paresthesias	IFNA2	Database	0	7, 6	6
nausea, urticaria	CACNA1I	Database	4	7	3, 12
nausea, urticaria	CACNA1G	Database	4	7	3, 12
nausea, urticaria	HLA-DRB1	0	Database	7	3, 12
nausea, urticaria	VCAM1	0	Database	7	3, 12
nausea, urticaria	ICAM1	0	Database	11, 7	12
nausea, urticaria	HLA-DPB1	0	Database	11, 7	12
nausea, urticaria	POMC	Database	0	11, 7	12
nausea, urticaria	PDE4A	Database	0	11, 7	12
nausea, urticaria	PDE4B	Database	8	11, 7	12
nausea, urticaria	PDE4C	Database	2	11, 7	12
nausea, urticaria	PDE4D	Database	2	11, 7	12
nausea, urticaria	PTGS2	Database	0	11, 7	3, 12
nausea, urticaria	PTGS1	Database	20	11, 7	3, 12
nausea, urticaria	TGFB1	0	Database	11, 7, 6	3, 12
nausea, urticaria	IL1B	0	Database	11, 7, 6	3, 12
nausea, urticaria	CACNA1H	Database	13	11, 7, 6	3, 12
nausea, urticaria	HTR2A	Database	0	11, 7, 6	3, 12
nausea, urticaria	HTR2B	Database	0	11, 7, 6	3, 12
nausea, urticaria	IL18	0	Database	11, 7, 6	3, 12
nausea, urticaria	ADCY1	Database	0	11, 7, 6	3, 12
nausea, urticaria	HTR3B	Database	0	11, 7, 6	3, 12
nausea, urticaria	HTR3C	Database	4	11, 7, 6	3, 12
nausea, urticaria	HTR1A	Database	0	11, 7, 6	3, 12
nausea, urticaria	IFNG	Database	0	7, 6	3, 12
nausea, urticaria	ESR2	Database	5	7, 6	3, 12
nausea, urticaria	ESR1	Database	3	7, 6	3, 12
nausea, urticaria	IFNA2	Database	4	7, 6	3, 12
nausea, urticaria	HLA-DQB1	0	Database	NA	NA
nausea, urticaria	ALOX5	0	Database	NA	NA
nausea, urticaria	ALB	0	Database	NA	NA
nausea, vomiting	CACNA1I	Database	2	7	7
nausea, vomiting	CACNA1G	Database	20	7	7
nausea, vomiting	GNRH1	12	Database	7	7
nausea, vomiting	POMC	Database	20	11, 7	11, 7
nausea, vomiting	PDE4A	Database	Database	11, 7	11, 7
nausea, vomiting	PDE4B	Database	Database	11, 7	11, 7
nausea, vomiting	PDE4C	Database	Database	11, 7	11, 7
nausea, vomiting	PDE4D	Database	Database	11, 7	11, 7
nausea, vomiting	CACNA1H	Database	0	11, 7, 6	11, 7, 6
nausea, vomiting	ADCY1	Database	Database	11, 7, 6	11, 7, 6
nausea, vomiting	HTR3B	Database	Database	11, 7, 6	11, 7, 6
nausea, vomiting	HTR2B	Database	10	11, 7, 6	11, 7, 6
nausea, vomiting	HTR2A	Database	1	11, 7, 6	11, 7, 6
nausea, vomiting	HTR3C	Database	Database	11, 7, 6	11, 7, 6
nausea, vomiting	HTR1A	Database	0	11, 7, 6	11, 7, 6
nausea, vomiting	ESR2	Database	Database	7, 6	7, 6
nausea, vomiting	ESR1	Database	Database	7, 6	7, 6
nausea, vomiting	IFNG	Database	Database	7, 6	7, 6
nausea, vomiting	IFNA2	Database	Database	7, 6	7, 6
nausea, vomiting	TACR1	8	Database	NA	NA
nervous system disorders, thoracic complications	TUBB1	0	0	6	6
nervous system disorders, thoracic complications	TUBA1A	0	0	6	9, 10, 6
nervous system disorders, thoracic complications	TUBBP1	0	0	NA	NA
nervous system disorders, vascular disorders	GMPS	0	0	6	12
nervous system disorders, vascular disorders	GLUL	0	3	6	12
nervous system disorders, vascular disorders	PPAT	0	0	6	3, 12
nervous system disorders, vascular disorders	CTPS	0	0	NA	NA
nervous system disorders, vascular disorders	QARS	0	12	NA	NA
nervous system disorders, vascular disorders	ASNS	0	20	NA	NA
nervous system disorders, vascular disorders	PET112L	19	0	NA	NA
nervous system disorders, vascular disorders	GFPT2	20	0	NA	NA
nervous system disorders, vascular disorders	GLS	0	0	NA	NA
nervous system disorders, vascular disorders	GLS2	0	0	NA	NA
nervous system disorders, vascular disorders	CAD	0	0	NA	NA
nervousness, mouth dry	PDE4A	Database	20	5	11
nervousness, mouth dry	PDE4B	Database	0	5	11
nervousness, mouth dry	PDE4C	Database	0	5	11
nervousness, mouth dry	PDE4D	Database	0	5	11
nervousness, palpitation	PDE4A	Database	0	5	——
nervousness, palpitation	PDE4B	Database	15	5	——
nervousness, palpitation	PDE4C	Database	3	5	——
nervousness, palpitation	PDE4D	Database	0	5	——
nervousness, palpitation	ADRB1	0	20	NA	NA
nervousness, palpitation	ADRB2	0	0	NA	NA
nervousness, palpitation	ADRB3	0	9	NA	NA
nervousness, somnolence	PDE4A	Database	2	5	5
nervousness, somnolence	PDE4B	Database	0	5	5
nervousness, somnolence	PDE4C	Database	5	5	5
nervousness, somnolence	PDE4D	Database	0	5	5
oedema, allergy	ESR1	Database	0	7	3, 12
oedema, allergy	ESR2	Database	0	9, 15, 7	3, 12
oedema, headache	ESR1	Database	0	7	6
oedema, headache	CACNA1I	2	Database	7	——
oedema, headache	CACNA1C	0	Database	7	——
oedema, headache	CACNA1D	0	Database	7	——
oedema, headache	CACNA1F	16	Database	7	——
oedema, headache	CACNA1G	2	Database	7	——
oedema, headache	GNRH1	0	Database	7	——
oedema, headache	CACNA1S	20	Database	7	——
oedema, headache	CACNA1H	0	Database	11, 14, 7	5, 6
oedema, headache	ESR2	Database	20	9, 15, 7	6
oedema, headache	OXT	0	Database	NA	NA
oedema, infections	ESR1	Database	0	7	——
oedema, infections	ESR2	Database	4	9, 15, 7	——
oedema, itching	ESR1	Database	20	7	6
oedema, itching	ESR2	Database	20	9, 15, 7	6
oedema, myalgia	ESR1	Database	0	7	13, 6
oedema, myalgia	ESR2	Database	0	9, 15, 7	13, 6
oedema, nausea	CACNA1I	0	Database	7	7
oedema, nausea	CACNA1G	0	Database	7	7
oedema, nausea	ESR1	Database	Database	7	7, 6
oedema, nausea	IFNG	0	Database	7	7, 6
oedema, nausea	IFNA2	8	Database	7	7, 6
oedema, nausea	CACNA1H	0	Database	11, 14, 7	11, 7, 6
oedema, nausea	HTR2B	0	Database	11, 14, 7	11, 7, 6
oedema, nausea	HTR2A	0	Database	11, 14, 7	11, 7, 6
oedema, nausea	HTR3B	0	Database	11, 14, 7	11, 7, 6
oedema, nausea	HTR3C	2	Database	11, 14, 7	11, 7, 6
oedema, nausea	HTR1A	0	Database	11, 14, 7	11, 7, 6
oedema, nausea	ADCY1	0	Database	11, 15, 14, 7	11, 7, 6
oedema, nausea	POMC	13	Database	11, 7	11, 7
oedema, nausea	PDE4A	0	Database	11, 7	11, 7
oedema, nausea	PDE4B	3	Database	11, 7	11, 7
oedema, nausea	PDE4C	0	Database	11, 7	11, 7
oedema, nausea	PDE4D	0	Database	11, 7	11, 7
oedema, nausea	ESR2	Database	Database	9, 15, 7	7, 6
oedema, paresthesias	ESR1	Database	0	7	6
oedema, paresthesias	ESR2	Database	0	9, 15, 7	6
oedema, skin rashes	ESR1	Database	0	7	12
oedema, skin rashes	ESR2	Database	0	9, 15, 7	12
oedema, urticaria	GOT1	0	2	7	12
oedema, urticaria	HLA-DRB1	0	Database	7	3, 12
oedema, urticaria	ESR1	Database	19	7	3, 12
oedema, urticaria	CDO1	0	3	10, 15, 7	3, 12
oedema, urticaria	GSTM1	20	Database	11, 10, 15, 14, 7, 9	3, 12
oedema, urticaria	TGFB1	20	Database	11, 14, 7	3, 12
oedema, urticaria	IL1B	0	Database	11, 14, 7	3, 12
oedema, urticaria	CHUK	20	0	11, 14, 7	3, 12
oedema, urticaria	TNF	0	Database	11, 14, 7	3, 12
oedema, urticaria	IL18	20	Database	11, 14, 7	3, 12
oedema, urticaria	CBS	2	5	11, 14, 7	3, 12
oedema, urticaria	ICAM1	0	Database	11, 7	12
oedema, urticaria	HLA-DPB1	0	Database	11, 7	12
oedema, urticaria	CTH	0	20	11, 7	3, 12
oedema, urticaria	VCAM1	0	Database	9, 15, 7	3, 12
oedema, urticaria	ESR2	Database	14	9, 15, 7	3, 12
oedema, urticaria	GSS	0	15	NA	NA
oedema, urticaria	GCLM	6	20	NA	NA
oedema, urticaria	GCLC	0	0	NA	NA
oedema, urticaria	HLA-DQB1	0	Database	NA	NA
oedema, urticaria	ALB	0	Database	NA	NA
oedema, urticaria	CSAD	0	3	NA	NA
paresthesias, insomnia	CYP2C19	0	2	6	5, 6
paresthesias, insomnia	MAOB	0	Database	——	5
paresthesias, insomnia	MAOA	0	Database	NA	NA
paresthesias, mouth dry	HTR1D	0	0	6	11, 6
paresthesias, mouth dry	HTR1A	0	20	6	11, 6
paresthesias, mouth dry	HTR1B	0	0	6	11, 6
paresthesias, myalgia	DRD2	0	2	6	13, 6
paresthesias, myalgia	HTR1A	0	20	6	13, 6
paresthesias, myalgia	HTR1B	0	0	6	13, 6
paresthesias, somnolence	HTR1D	0	0	6	5, 6
paresthesias, somnolence	DRD2	0	5	6	5, 6
paresthesias, somnolence	HTR1A	0	0	6	5, 6
paresthesias, somnolence	HTR1B	0	0	6	5, 6
paresthesias, sweating	HTR1D	0	0	6	6
paresthesias, sweating	HTR1F	0	20	6	6
paresthesias, sweating	HTR1A	0	10	6	6
paresthesias, sweating	HTR1B	0	5	6	6
paresthesias, vertigo	HTR1B	0	0	6	5, 6
paresthesias, vertigo	HTR1D	0	0	6	5, 6
paresthesias, vertigo	HTR1F	0	0	6	5, 6
paresthesias, vertigo	SCN1B	0	Database	6	9, 5, 6
paresthesias, vertigo	SCN2B	0	Database	NA	NA
paresthesias, vertigo	SCN3B	20	Database	NA	NA
respiratory tract infection, upper respiratory infection	CYP3A7	5	0	——	——
respiratory tract infection, upper respiratory infection	CYP3A5	0	0	——	——
rhinitis, myalgia	IL13	Database	0	——	13, 6
rhinitis, myalgia	CYP3A7	5	0	——	13, 6
rhinitis, myalgia	IL4	Database	0	——	13, 6
rhinitis, myalgia	CYP3A5	0	0	——	13, 6
rhinitis, myalgia	CYP3A4	20	0	——	13, 6
salivation, increased salivation	ADRA1D	0	0	6	6
salivation, increased salivation	HTR6	2	0	11, 6	11, 6
salivation, increased salivation	CHRM3	0	0	11, 6	11, 6
salivation, increased salivation	DRD4	0	20	11, 6	11, 6
salivation, increased salivation	DRD2	0	0	11, 6	11, 6
salivation, increased salivation	DRD3	0	0	11, 6	11, 6
salivation, increased salivation	CHRM1	0	0	11, 6	11, 6
salivation, increased salivation	HTR7	0	14	11, 6	11, 6
salivation, increased salivation	HTR2A	0	5	11, 6	11, 6
salivation, increased salivation	HTR2C	0	3	11, 6	11, 6
salivation, increased salivation	HTR2B	0	4	11, 6	11, 6
salivation, increased salivation	DRD1	3	0	11, 6	11, 6
salivation, increased salivation	HTR1A	0	5	11, 6	11, 6
salivation, increased salivation	ADRA2C	0	20	NA	NA
salivation, increased salivation	ADRA2A	0	2	NA	NA
skin rashes, thrombocytopenia	ITGB3	0	Database	12	3
skin rashes, thrombocytopenia	ITGA2B	0	Database	12	3
skin rashes, thrombocytopenia	PF4	0	Database	12	3
skin rashes, thrombocytopenia	IL3	0	Database	12	3
skin rashes, thrombocytopenia	CSF2	0	Database	12	——
skin rashes, thrombocytopenia	ALB	0	Database	NA	NA
skin rashes, thrombocytopenia	IMPDH1	0	0	NA	NA
skin rashes, thrombocytopenia	IMPDH2	0	0	NA	NA
skin rashes, thrombocytopenia	GP1BB	0	Database	NA	NA
skin rashes, thrombocytopenia	GP9	0	Database	NA	NA
skin rashes, thrombocytopenia	ITPA	0	Database	NA	NA
skin rashes, urticaria	HLA-DPB1	0	Database	12	12
skin rashes, urticaria	ICAM1	0	Database	12	12
skin rashes, urticaria	GOT1	12	0	12	12
skin rashes, urticaria	IL18	0	Database	12	3, 12
skin rashes, urticaria	TGFB1	0	Database	12	3, 12
skin rashes, urticaria	HLA-DRB1	0	Database	12	3, 12
skin rashes, urticaria	PRKCB	3	0	12	3, 12
skin rashes, urticaria	CHUK	0	20	12	3, 12
skin rashes, urticaria	CBS	0	5	12	3, 12
skin rashes, urticaria	TNF	4	Database	12	3, 12
skin rashes, urticaria	CDO1	20	4	12	3, 12
skin rashes, urticaria	GSTM1	0	Database	12	3, 12
skin rashes, urticaria	IL1B	10	Database	12	3, 12
skin rashes, urticaria	CTH	20	0	12	3, 12
skin rashes, urticaria	VCAM1	3	Database	12	3, 12
skin rashes, urticaria	GSS	0	0	NA	NA
skin rashes, urticaria	GCLM	0	0	NA	NA
skin rashes, urticaria	GCLC	20	0	NA	NA
skin rashes, urticaria	ALB	0	Database	NA	NA
skin rashes, urticaria	CSAD	3	10	NA	NA
skin rashes, urticaria	HLA-DQB1	0	Database	NA	NA
skin rashes, vomiting	GNRH1	0	Database	12	7
skin rashes, vomiting	PDE4A	0	Database	12	11, 7
skin rashes, vomiting	PDE4B	0	Database	12	11, 7
skin rashes, vomiting	PDE4C	3	Database	12	11, 7
skin rashes, vomiting	PDE4D	0	Database	12	11, 7
skin rashes, vomiting	ADCY1	20	Database	12	11, 7, 6
skin rashes, vomiting	HTR3B	0	Database	12	11, 7, 6
skin rashes, vomiting	HTR3C	0	Database	12	11, 7, 6
skin rashes, vomiting	ESR2	0	Database	12	7, 6
skin rashes, vomiting	ESR1	0	Database	12	7, 6
skin rashes, vomiting	IFNG	0	Database	12	7, 6
skin rashes, vomiting	IFNA2	0	Database	12	7, 6
skin rashes, vomiting	TACR1	20	Database	NA	NA
sweating, mouth dry	OPRK1	0	20	6	11, 6
sweating, mouth dry	OPRM1	0	2	6	11, 6
sweating, mouth dry	OPRD1	0	12	6	11, 6
sweating, mouth dry	HTR2B	3	6	6	11, 6
sweating, mouth dry	HTR1D	0	0	6	11, 6
sweating, mouth dry	HTR1A	2	12	6	11, 6
sweating, mouth dry	ADRA1D	5	0	6	9, 6
sweating, mouth dry	ADRA2C	0	14	NA	NA
thrombocytopenia, vomiting	GNRH1	0	Database	3	7
thrombocytopenia, vomiting	PTGS2	2	Database	3	11, 7
thrombocytopenia, vomiting	HTR3C	0	Database	3	11, 7, 6
thrombocytopenia, vomiting	PF4	Database	0	3	11, 7, 6
thrombocytopenia, vomiting	ITGA2B	Database	0	3	11, 7, 6
thrombocytopenia, vomiting	ITGB3	Database	20	3	11, 7, 6
thrombocytopenia, vomiting	PRKCE	0	0	3	11, 7, 6
thrombocytopenia, vomiting	ADCY1	0	Database	3	11, 7, 6
thrombocytopenia, vomiting	HTR3B	0	Database	3	11, 7, 6
thrombocytopenia, vomiting	IL3	Database	0	3	11, 7, 6
thrombocytopenia, vomiting	IFNG	0	Database	3	7, 6
thrombocytopenia, vomiting	ESR1	0	Database	3	7, 6
thrombocytopenia, vomiting	IFNA2	Database	Database	3	7, 6
thrombocytopenia, vomiting	CSF2	Database	0	——	11, 7
thrombocytopenia, vomiting	PDE4A	0	Database	——	11, 7
thrombocytopenia, vomiting	PDE4B	0	Database	——	11, 7
thrombocytopenia, vomiting	PDE4C	0	Database	——	11, 7
thrombocytopenia, vomiting	PDE4D	0	Database	——	11, 7
thrombocytopenia, vomiting	MAPK1	0	0	9, 3	11, 7, 6
thrombocytopenia, vomiting	ESR2	0	Database	9, 3	7, 6
thrombocytopenia, vomiting	MASTL	Database	0	NA	NA
thrombocytopenia, vomiting	GP1BB	Database	0	NA	NA
thrombocytopenia, vomiting	GP9	Database	0	NA	NA
thrombocytopenia, vomiting	TERT	20	0	NA	NA
thrombocytopenia, vomiting	TOP2A	0	Database	NA	NA
thrombocytopenia, vomiting	FCGR2A	Database	0	NA	NA
thrombocytopenia, vomiting	TACR1	0	Database	NA	NA
thrombocytopenia, vomiting	GATA1	Database	14	NA	NA
thrombocytopenia, vomiting	ALB	Database	5	NA	NA
thrombocytopenia, vomiting	ITPA	Database	2	NA	NA
tiredness, paresthesias	HTR1D	0	4	5, 6	6
tiredness, paresthesias	HTR1A	0	3	5, 6	6
tiredness, paresthesias	HTR1B	0	0	5, 6	6
tiredness, paresthesias	ADRB1	0	0	NA	NA
tiredness, paresthesias	ADRB3	0	0	NA	NA
urticaria, vomiting	ICAM1	Database	6	12	11, 7
urticaria, vomiting	HLA-DPB1	Database	0	12	11, 7
urticaria, vomiting	PDE4A	0	Database	12	11, 7
urticaria, vomiting	PDE4B	0	Database	12	11, 7
urticaria, vomiting	PDE4C	0	Database	12	11, 7
urticaria, vomiting	PDE4D	0	Database	12	11, 7
urticaria, vomiting	HLA-DRB1	Database	0	3, 12	7
urticaria, vomiting	VCAM1	Database	0	3, 12	7
urticaria, vomiting	GNRH1	0	Database	3, 12	7
urticaria, vomiting	PTGS2	5	Database	3, 12	11, 7
urticaria, vomiting	PTGS1	0	Database	3, 12	11, 7
urticaria, vomiting	TGFB1	Database	2	3, 12	11, 7, 6
urticaria, vomiting	IL1B	Database	0	3, 12	11, 7, 6
urticaria, vomiting	IL18	Database	0	3, 12	11, 7, 6
urticaria, vomiting	ADCY1	0	Database	3, 12	11, 7, 6
urticaria, vomiting	HTR3B	0	Database	3, 12	11, 7, 6
urticaria, vomiting	HTR3C	0	Database	3, 12	11, 7, 6
urticaria, vomiting	IFNG	0	Database	3, 12	7, 6
urticaria, vomiting	ESR2	0	Database	3, 12	7, 6
urticaria, vomiting	ESR1	0	Database	3, 12	7, 6
urticaria, vomiting	IFNA2	0	Database	3, 12	7, 6
urticaria, vomiting	HLA-DQB1	Database	0	NA	NA
urticaria, vomiting	ALOX5	Database	0	NA	NA
urticaria, vomiting	TACR1	0	Database	NA	NA
urticaria, vomiting	ALB	Database	0	NA	NA
vascular disorders, thoracic complications	GOT1	0	2	12	6
vascular disorders, thoracic complications	CBS	3	5	3, 12	6
vascular disorders, thoracic complications	CDO1	0	0	3, 12	10
vascular disorders, thoracic complications	CTH	0	7	3, 12	——
vascular disorders, thoracic complications	GSS	0	0	NA	NA
vascular disorders, thoracic complications	GCLM	0	20	NA	NA
vascular disorders, thoracic complications	CSAD	0	0	NA	NA
vascular disorders, thoracic complications	GCLC	0	10	NA	NA
vascular disorders, thoracic complications	NFKB1	0	2	NA	NA
vascular disorders, thoracic complications	RELA	0	4	NA	NA
vascular disorders, thoracic complications	NFKB2	0	20	NA	NA
