# Supplementary material for: Identifying the causative proteins of similar side effect pairs to explore the common molecular basis of these side effects
Source: Royal Society of Chemistry journal article supplement (doi:10.1039/c5mb00242g), 2015-04-28
Supplement: c5mb00242g4.xlsx [file c5mb00242g4.xlsx]

## Sheet: Sheet1
ADR	protein
back pain	ADRA2A
back pain	DRD4
back pain	HTR1A
back pain	DRD2
back pain	DRD3
back pain	ADRA2C
back pain	CHRM1
back pain	HTR2C
back pain	ADRA1B
back pain	HTR2A
back pain	ADRA1D
back pain	ADRA1A
GOID	TERM	CORRECTED_PVALUE	UNCORRECTED_PVALUE	NUM_LIST_ANNOTATIONS	LIST_SIZE	TOTAL_NUM_ANNOTATIONS	POPULATION_SIZE	FDR_RATE	EXPECTED_FALSE_POSITIVES	ANNOTATED_GENES
GO:0019932	second-messenger-mediated signaling	2.82e-08	7.21e-11	9	12	947	46301	0	0	ADRA1B, ADRA1D, DRD4, DRD2, DRD3, CHRM1, HTR2A, HTR2C, HTR1A
GO:0044093	positive regulation of molecular function	7.12e-08	1.82e-10	8	12	88	46301	0	0	DRD4, DRD2, ADRA2A, CHRM1, ADRA2C, HTR2A, HTR2C, DRD3
GO:0007186	G-protein coupled receptor protein signaling pathway	1.98e-07	5.07e-10	12	12	1310	46301	0	0	ADRA1A, ADRA1B, ADRA1D, DRD4, DRD2, ADRA2A, CHRM1, ADRA2C, HTR2A, HTR2C, DRD3, HTR1A
GO:0007166	cell surface receptor linked signal transduction	2.65e-07	6.77e-10	12	12	16	46301	0	0	ADRA1A, ADRA1B, ADRA1D, DRD4, DRD2, ADRA2A, CHRM1, ADRA2C, HTR2A, HTR2C, DRD3, HTR1A
GO:0007242	intracellular signaling cascade	3.18e-07	8.14e-10	12	12	495	46301	0	0	ADRA1A, ADRA1B, ADRA1D, DRD4, DRD2, ADRA2A, CHRM1, ADRA2C, HTR2A, HTR2C, DRD3, HTR1A
GO:0008227	amine receptor activity	3.85e-07	9.86e-10	12	12	18	46301	0	0	ADRA1A, ADRA1B, ADRA1D, DRD4, DRD2, ADRA2A, CHRM1, ADRA2C, HTR2A, HTR2C, DRD3, HTR1A
GO:0050877	neurological system process	4.83e-07	1.24e-09	8	12	538	46301	0	0	ADRA1B, ADRA1D, DRD4, DRD2, DRD3, CHRM1, HTR2A, HTR2C
GO:0007267	cell-cell signaling	6.72e-07	1.72e-09	10	12	1605	46301	0	0	ADRA1A, ADRA1B, ADRA1D, DRD4, DRD2, DRD3, CHRM1, ADRA2C, HTR2A, HTR2C
GO:0043085	positive regulation of catalytic activity	8.42e-07	2.15e-09	8	12	162	46301	0	0	DRD4, DRD2, ADRA2A, CHRM1, ADRA2C, HTR2A, HTR2C, DRD3
GO:0042127	regulation of cell proliferation	1.2e-06	3.08e-09	8	12	177	46301	0	0	ADRA1A, ADRA1D, DRD2, ADRA2A, CHRM1, DRD3, HTR2A, HTR1A
